# Supplementary material for: Synthesis of sugar-derived spiroaminals via lactamization and metathesis reactions
Source: Royal Society of Chemistry journal article supplement (doi:10.1039/c0ob00555j), 2010-11-24
Supplement: c0ob00555j.pdf [file c0ob00555j.pdf]

## **Synthesis of sugar-derived spiroaminals via lactamization and metathesis reactions**

**Adabala Pal John Pal,<sup>a</sup> Parasuraman Kadigachalam,<sup>a</sup> Asadulla Mallick,<sup>a</sup> Venkata Ramana  
Doddi<sup>a</sup> and Yashwant D. Vankar<sup>\*a</sup>**

Department of Chemistry, Indian Institute of Technology,  
Kanpur – 208 016, India.

### **Contents List of the Supporting Information**

| <b>Contents</b>                                                                                                                                                                                                                                                               | <b>Page Number</b> |
|-------------------------------------------------------------------------------------------------------------------------------------------------------------------------------------------------------------------------------------------------------------------------------|--------------------|
| <sup>1</sup> H, <sup>13</sup> C NMR, COSY (for selected compounds) and<br>nOe (for selected compounds) spectra of compounds<br><b>21, 22, 23a, 23b, 24a, 24b, 25a, 25b, 26a, 27a, 27b,<br/>28a, 30, 32a, 32b, 33a, 33b, 34, 35, 36, 37a, 37b, 38a,<br/>38b, 39a, 39b, 40.</b> | 2-63               |

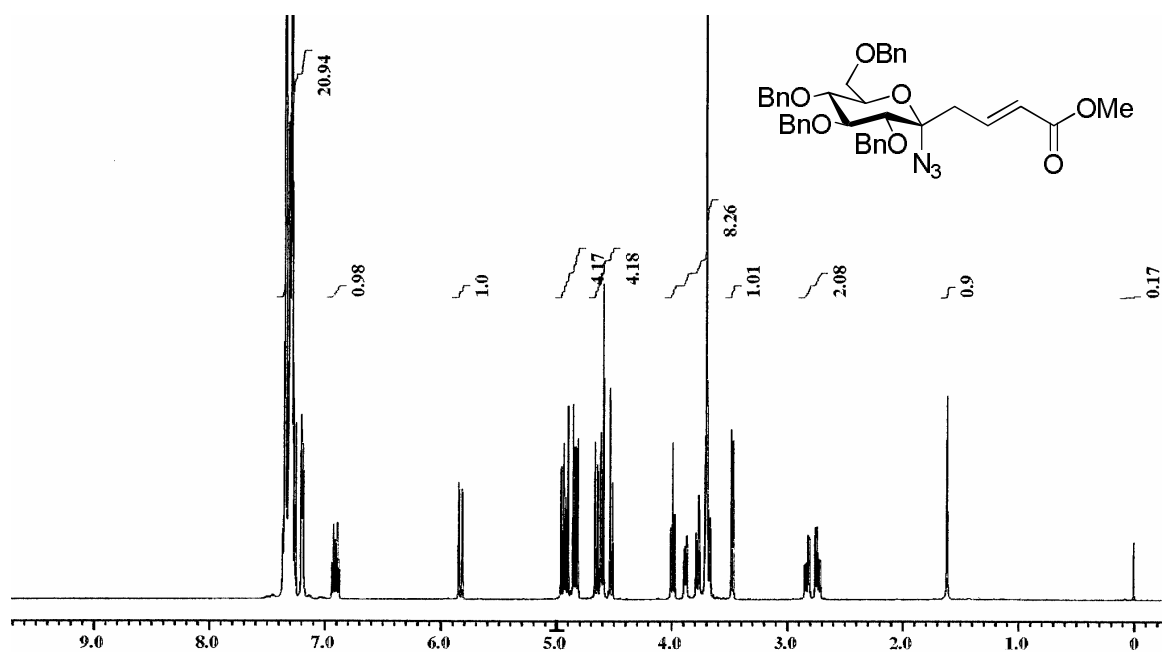

**Figure 1:** <sup>1</sup>H NMR (500 MHz) spectrum of compound **21**

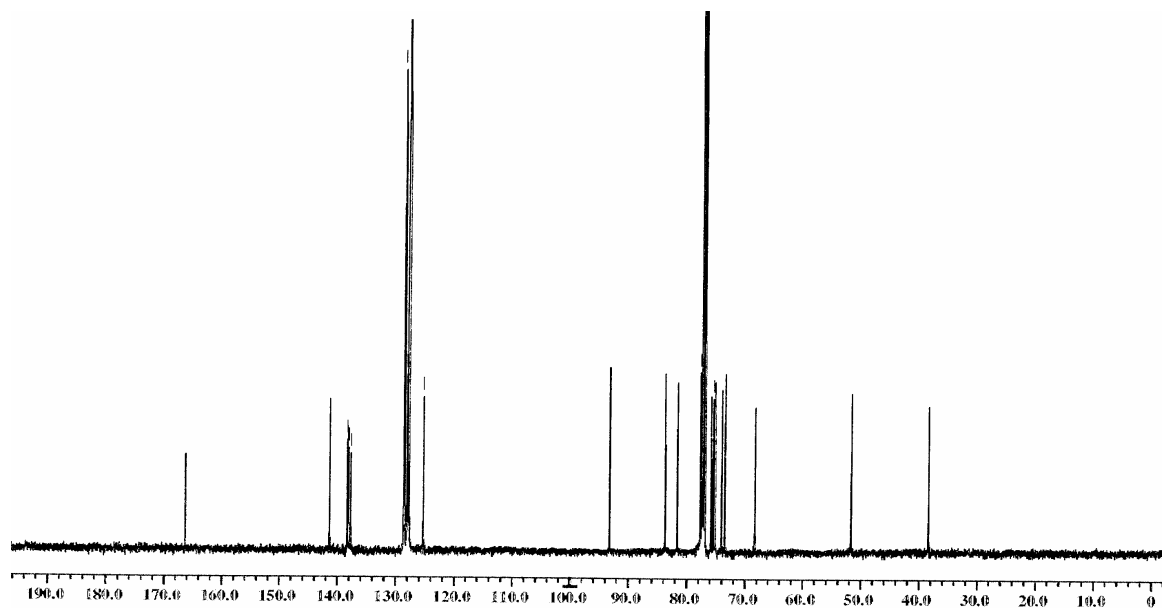

**Figure 2:** <sup>13</sup>C NMR (500 MHz) spectrum of compound **21**

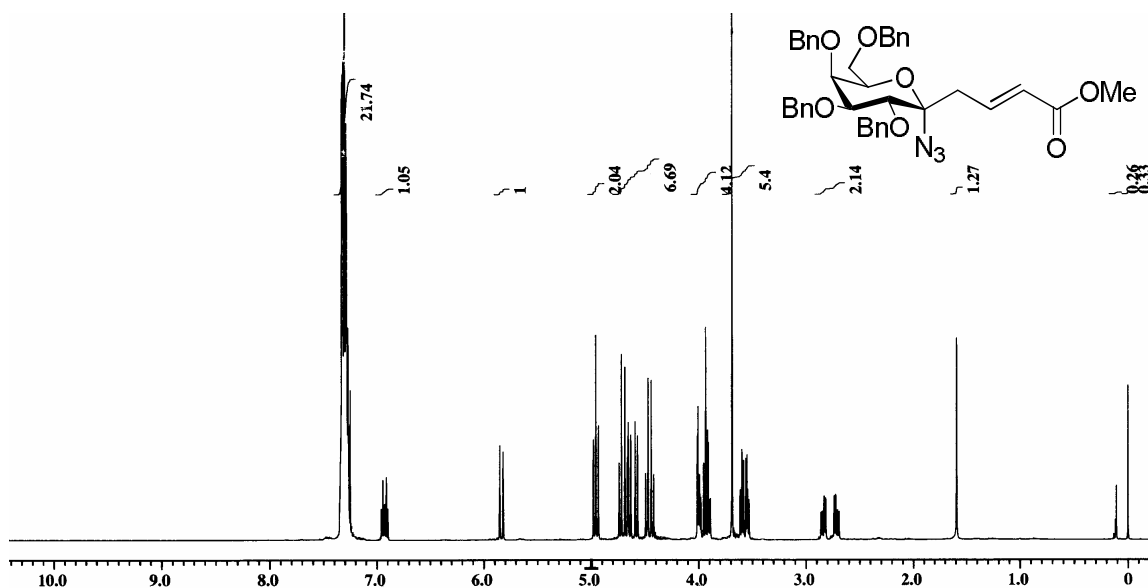

**Figure 3:** <sup>1</sup>H NMR (500 MHz) spectrum of compound 22

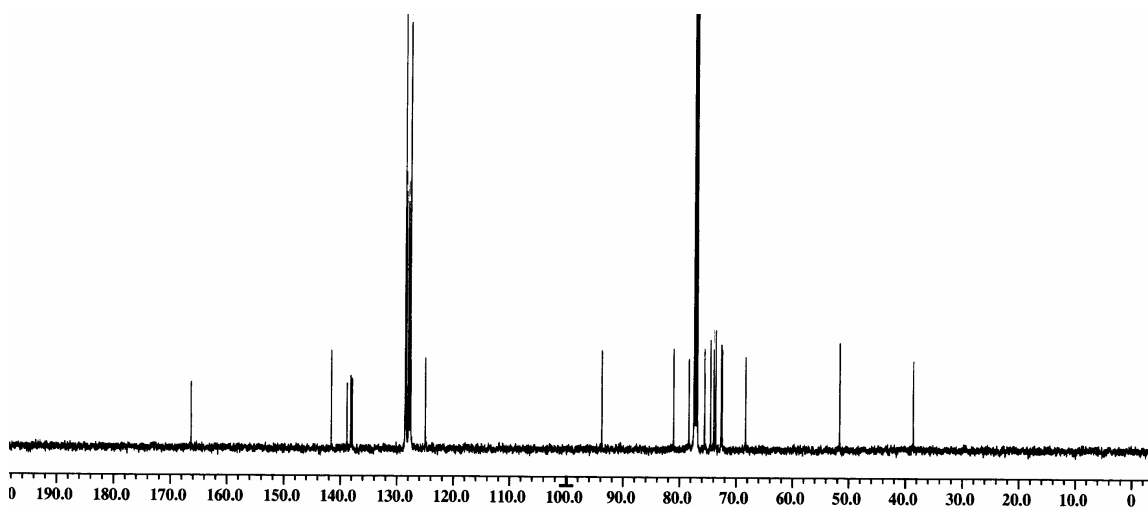

**Figure 4:** <sup>13</sup>C NMR (500 MHz) spectrum of compound 22

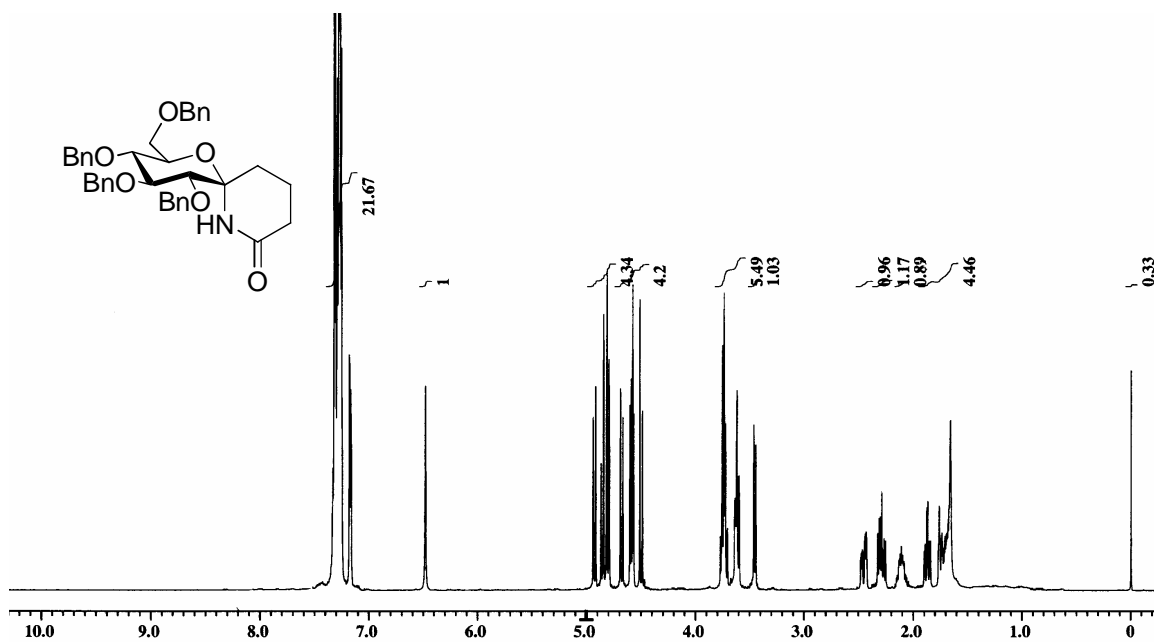

Figure 5: <sup>1</sup>H NMR (500 MHz) spectrum of compound 23a

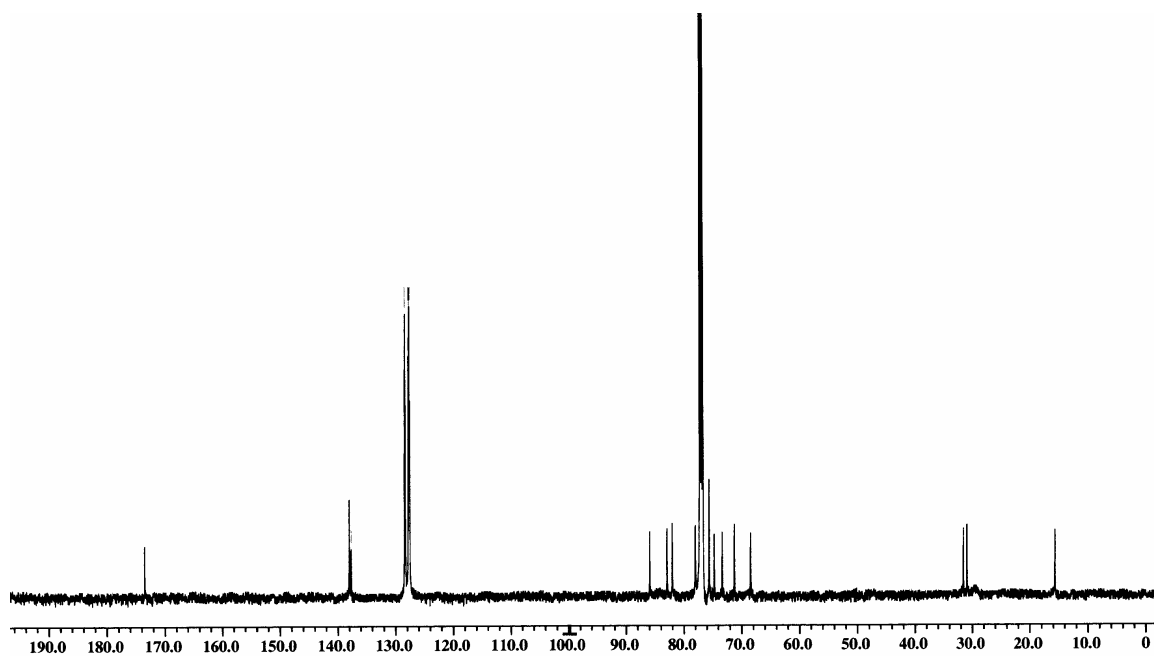

Figure 6: <sup>13</sup>C NMR (500 MHz) spectrum of compound 23a

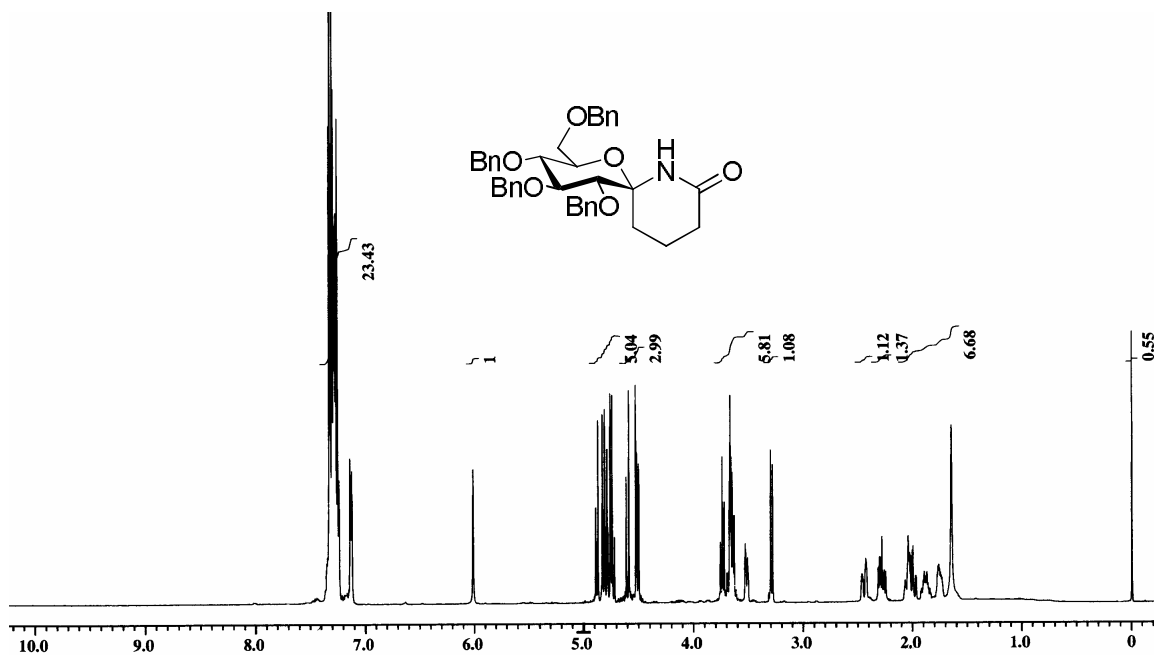

**Figure 7:**  $^1\text{H}$  NMR (500 MHz) spectrum of compound **23b**

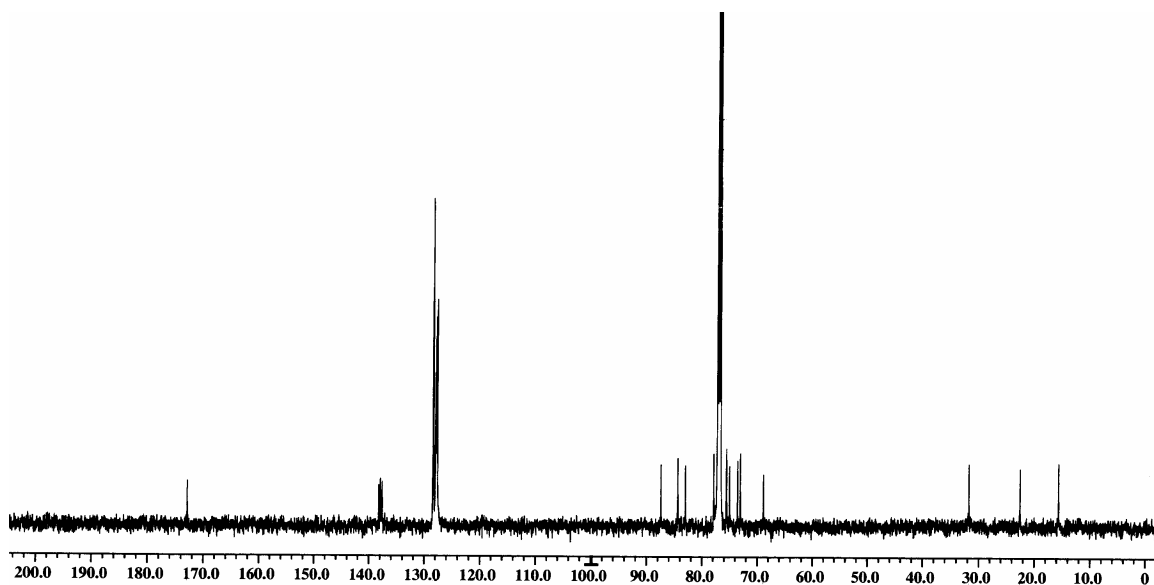

**Figure 8:**  $^{13}\text{C}$  NMR (500 MHz) spectrum of compound **23b**

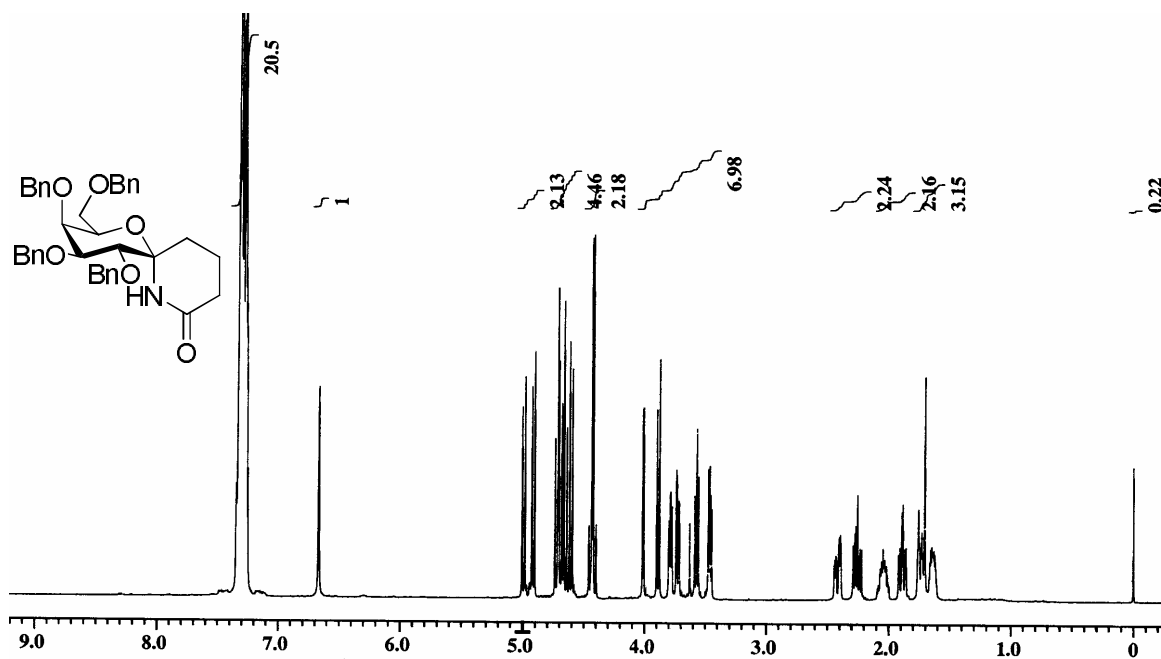

Figure 9: <sup>1</sup>H NMR (500 MHz) spectrum of compound 24a

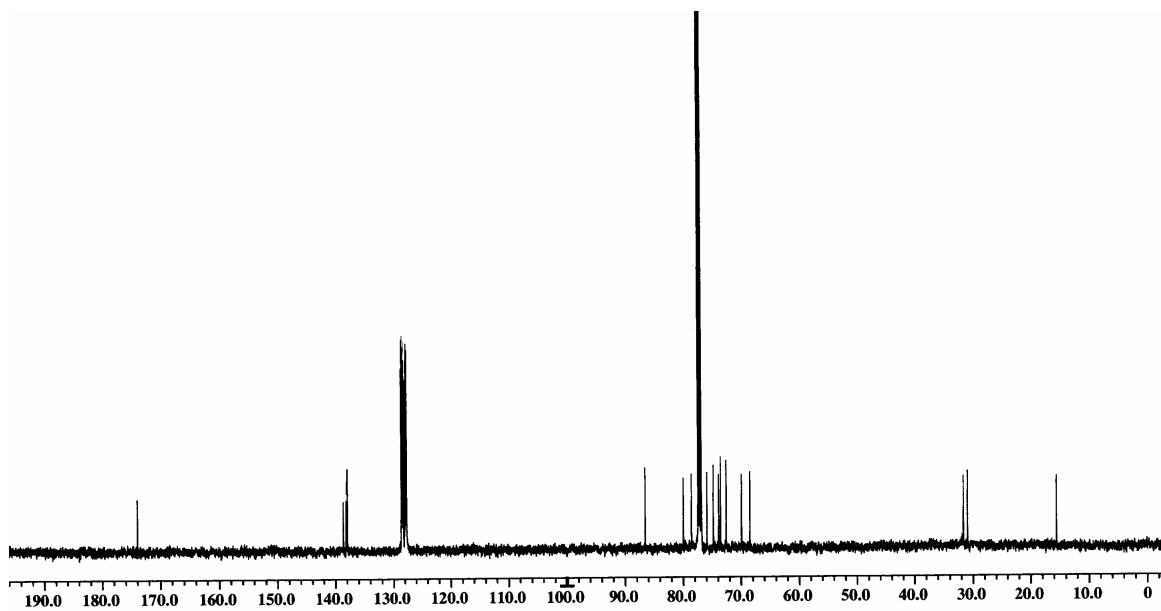

Figure 10: <sup>13</sup>C NMR (500 MHz) spectrum of compound 24a

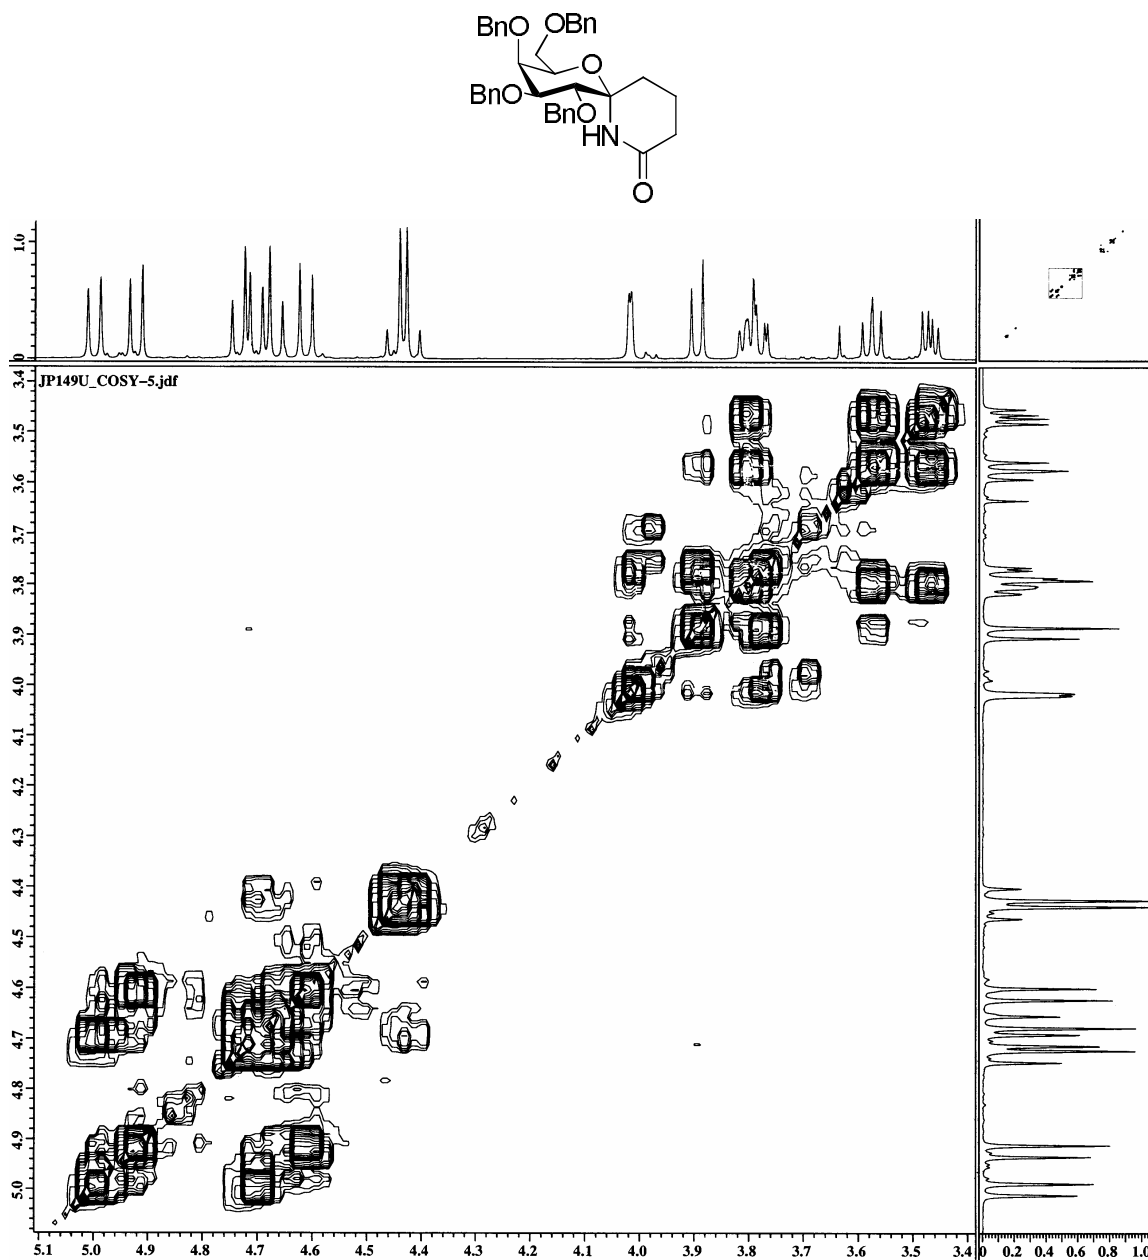

**Figure 11:**  $^1\text{H}$ - $^1\text{H}$  COSY (500 MHz) spectrum of compound **24a**

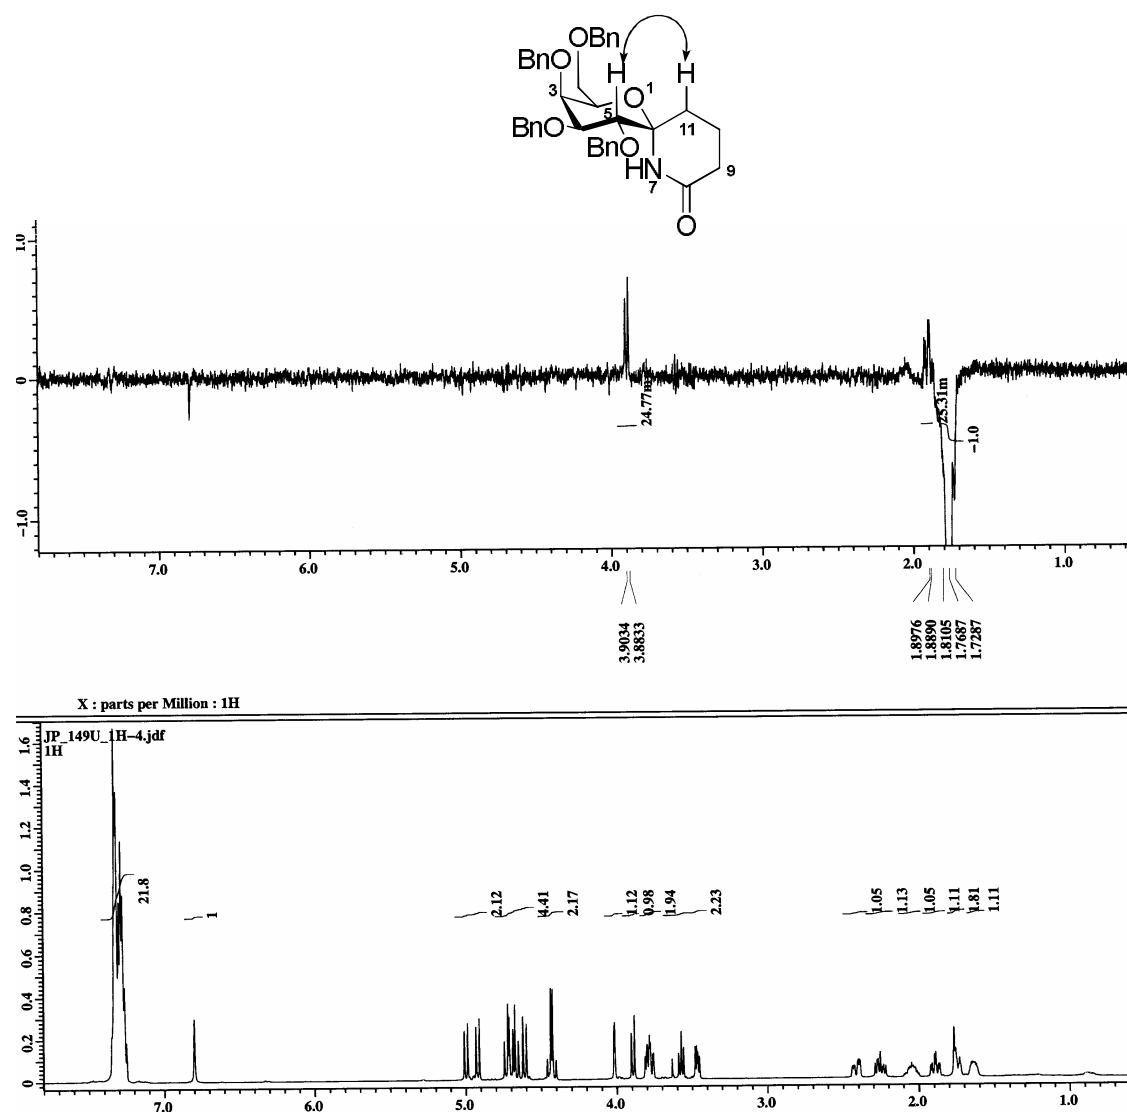

**Figure 12:** nOe (irradiation of H-11) spectrum of compound **24a**



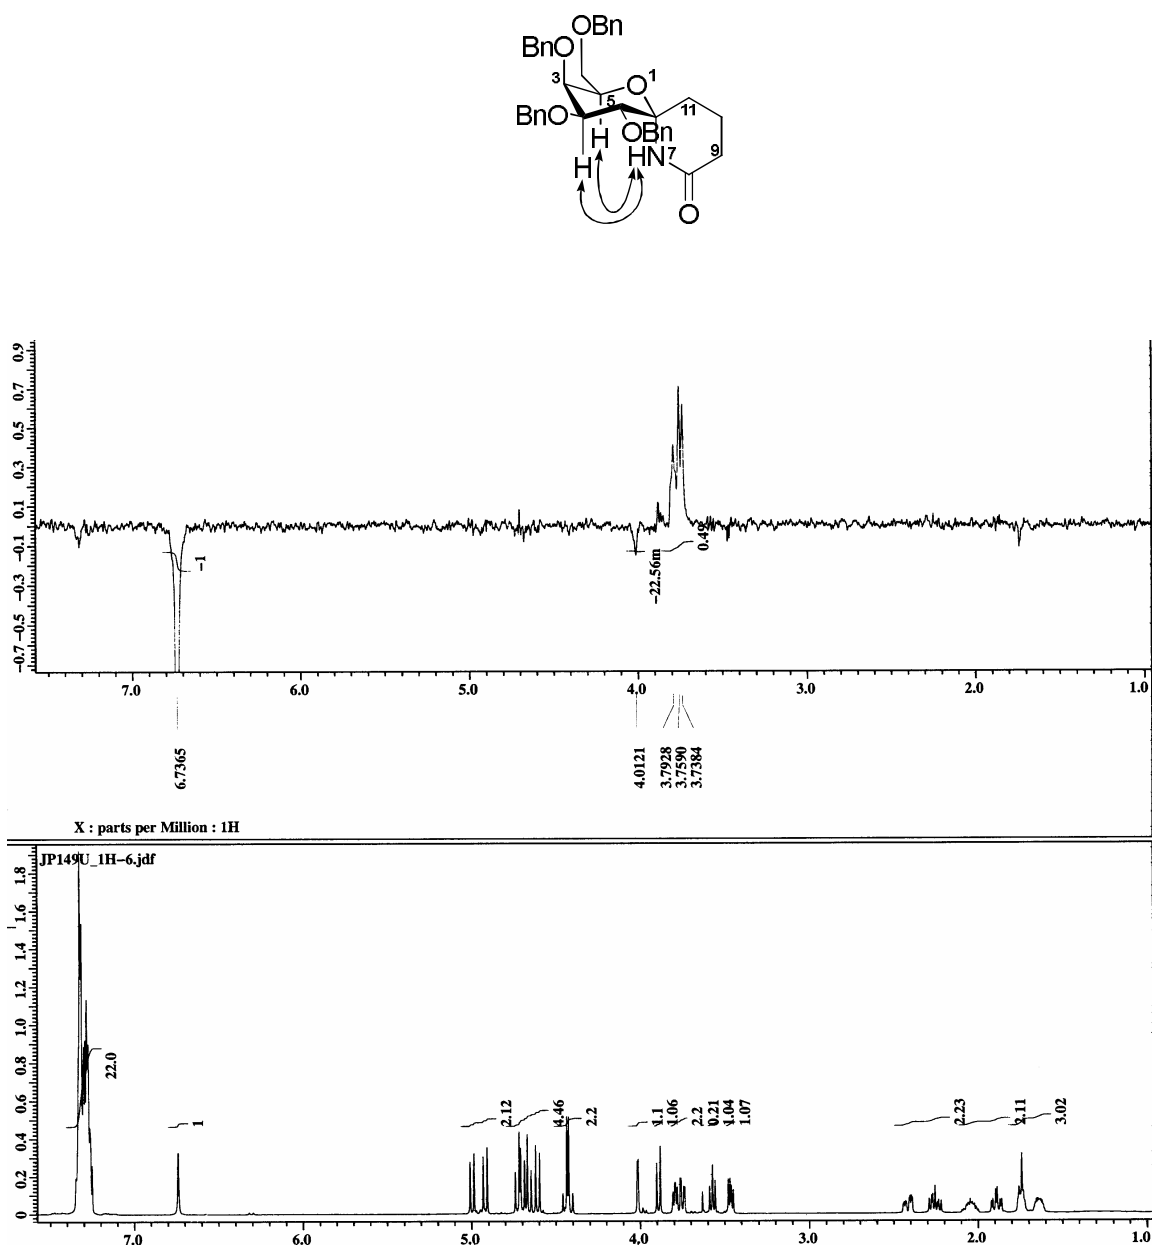

**Figure 13:** nOe (irradiation of -NH) spectrum of compound **24a**

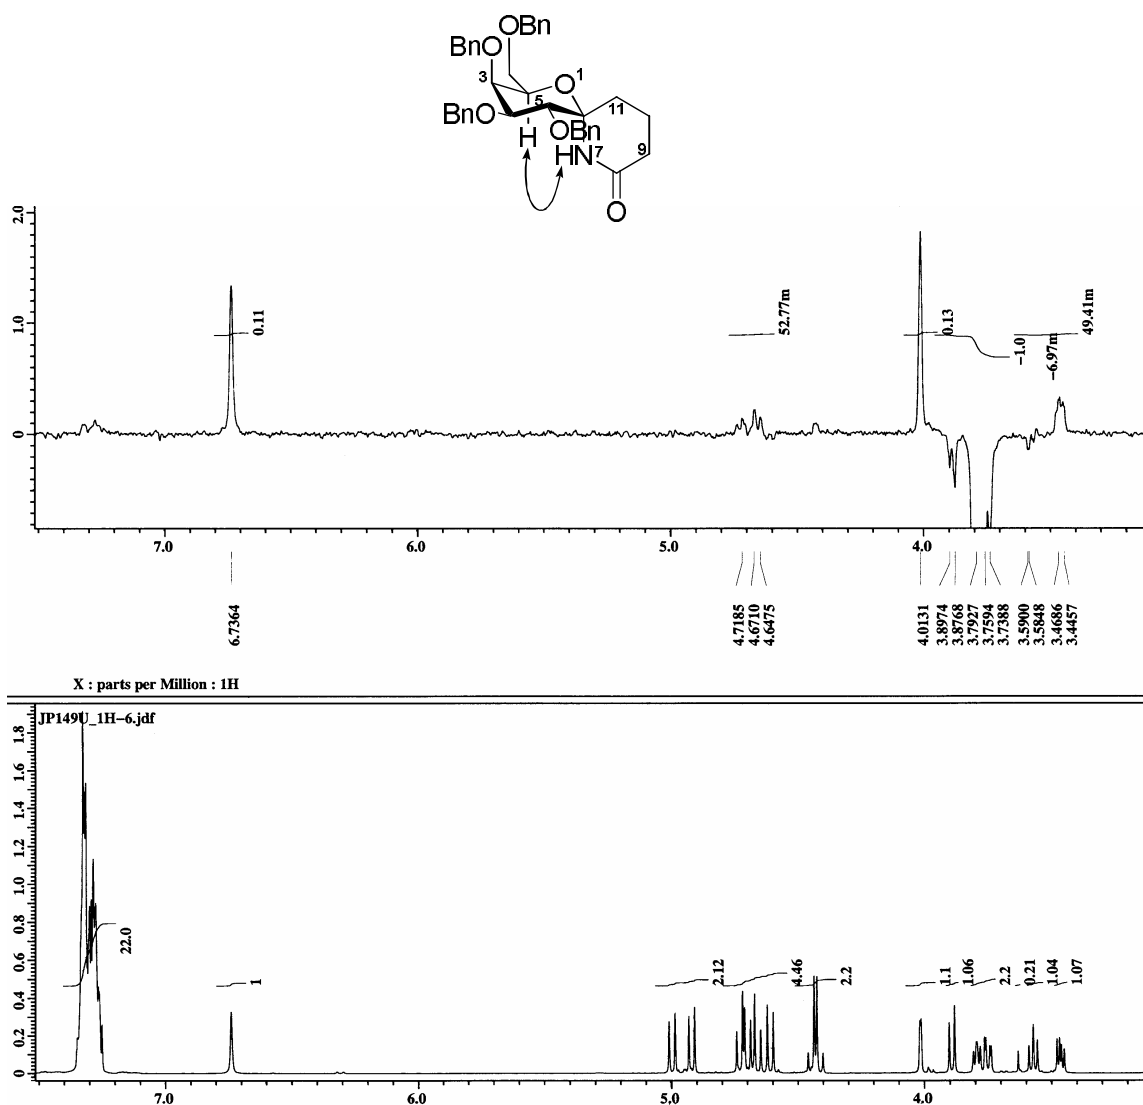

**Figure 14:** nOe (irradiation of H-2) spectrum of compound **24a**

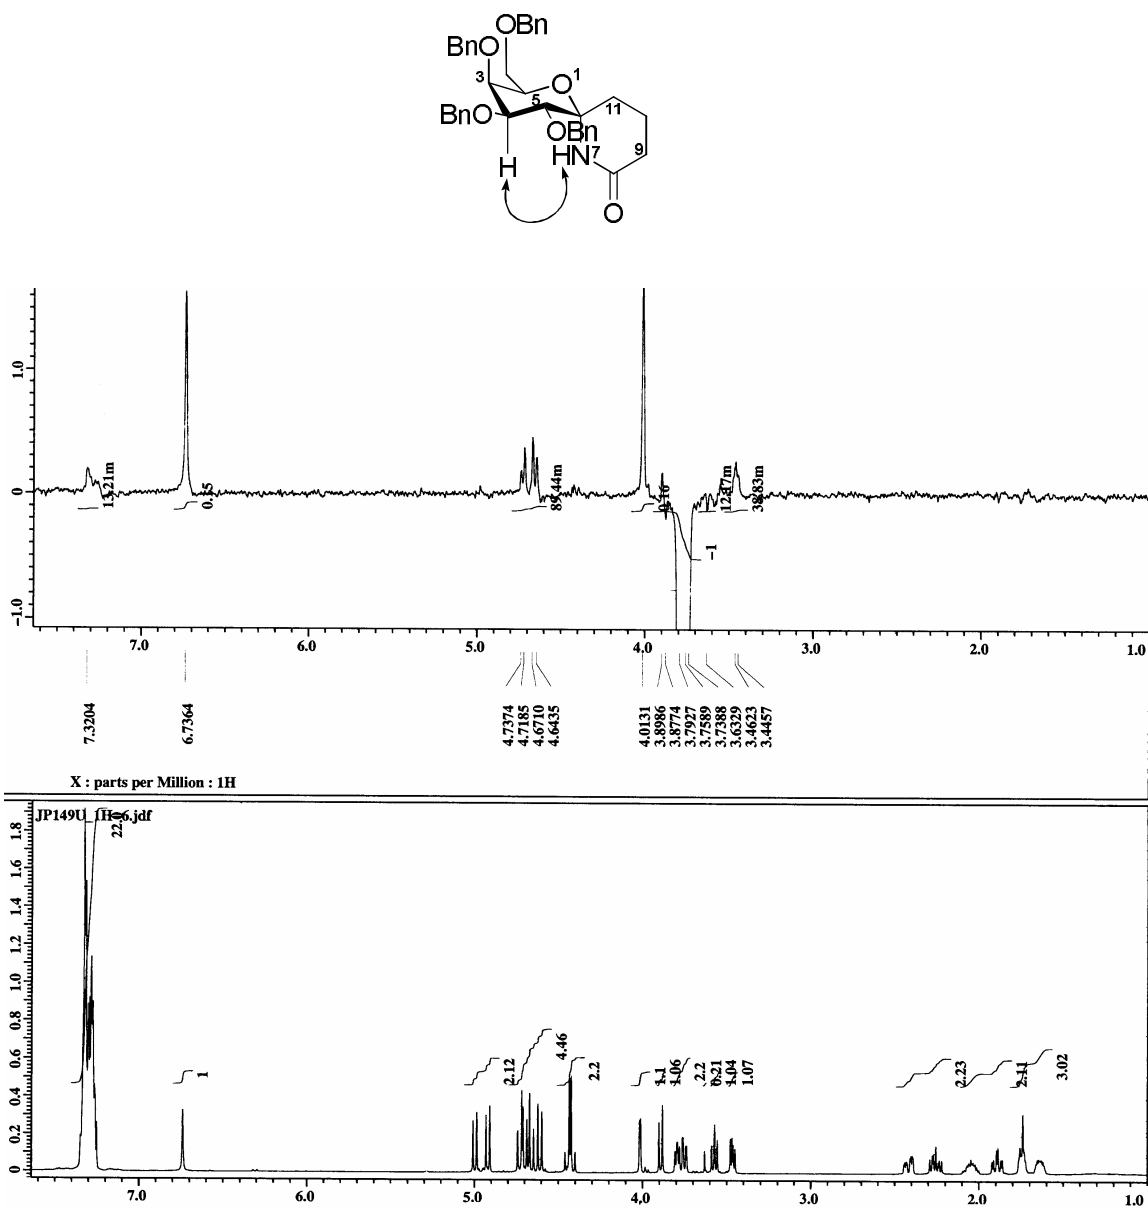

**Figure 15:** nOe (irradiation of H-4) spectrum of compound **24a**

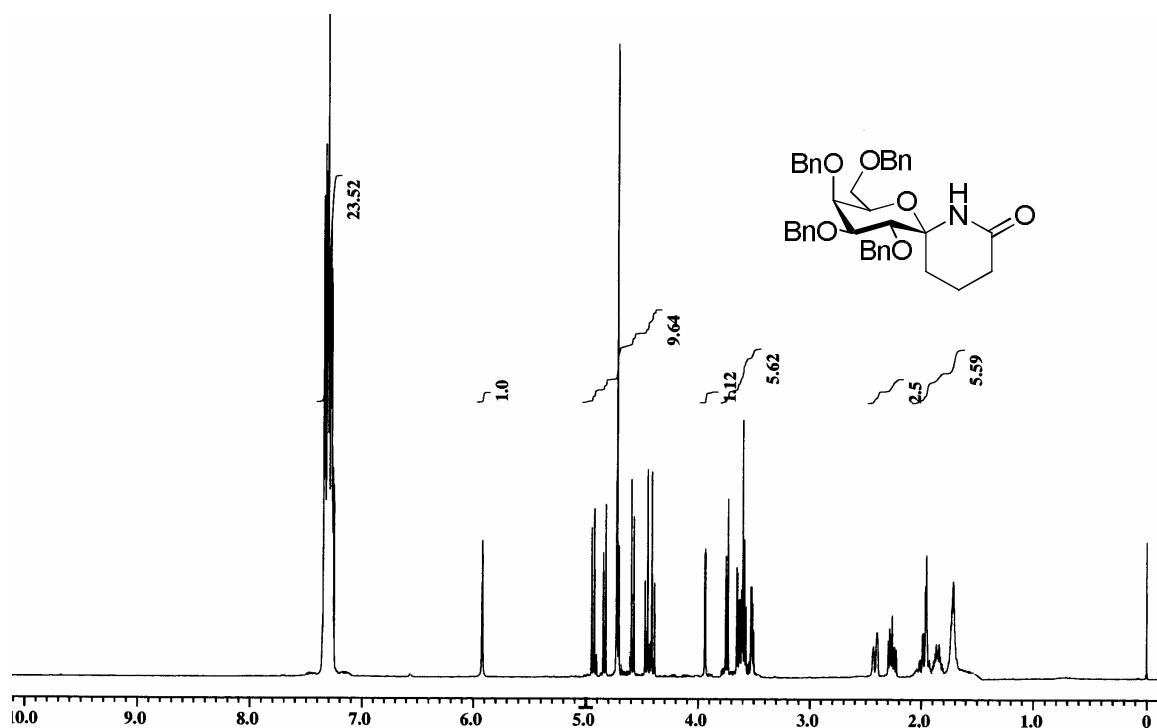

**Figure 16:**  $^1\text{H}$  NMR (500 MHz) spectrum of compound **24b**

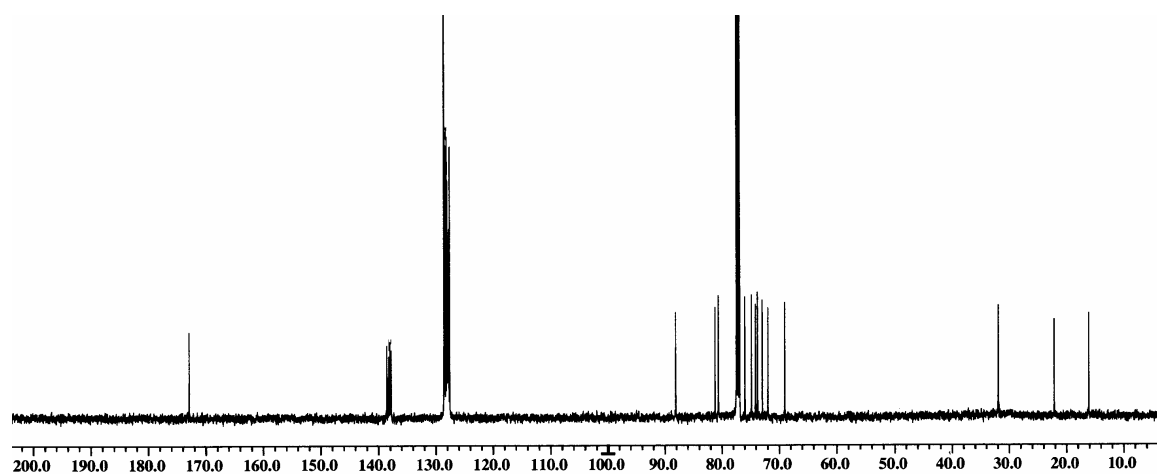

**Figure 17:**  $^{13}\text{C}$  NMR (500 MHz) spectrum of compound **24b**

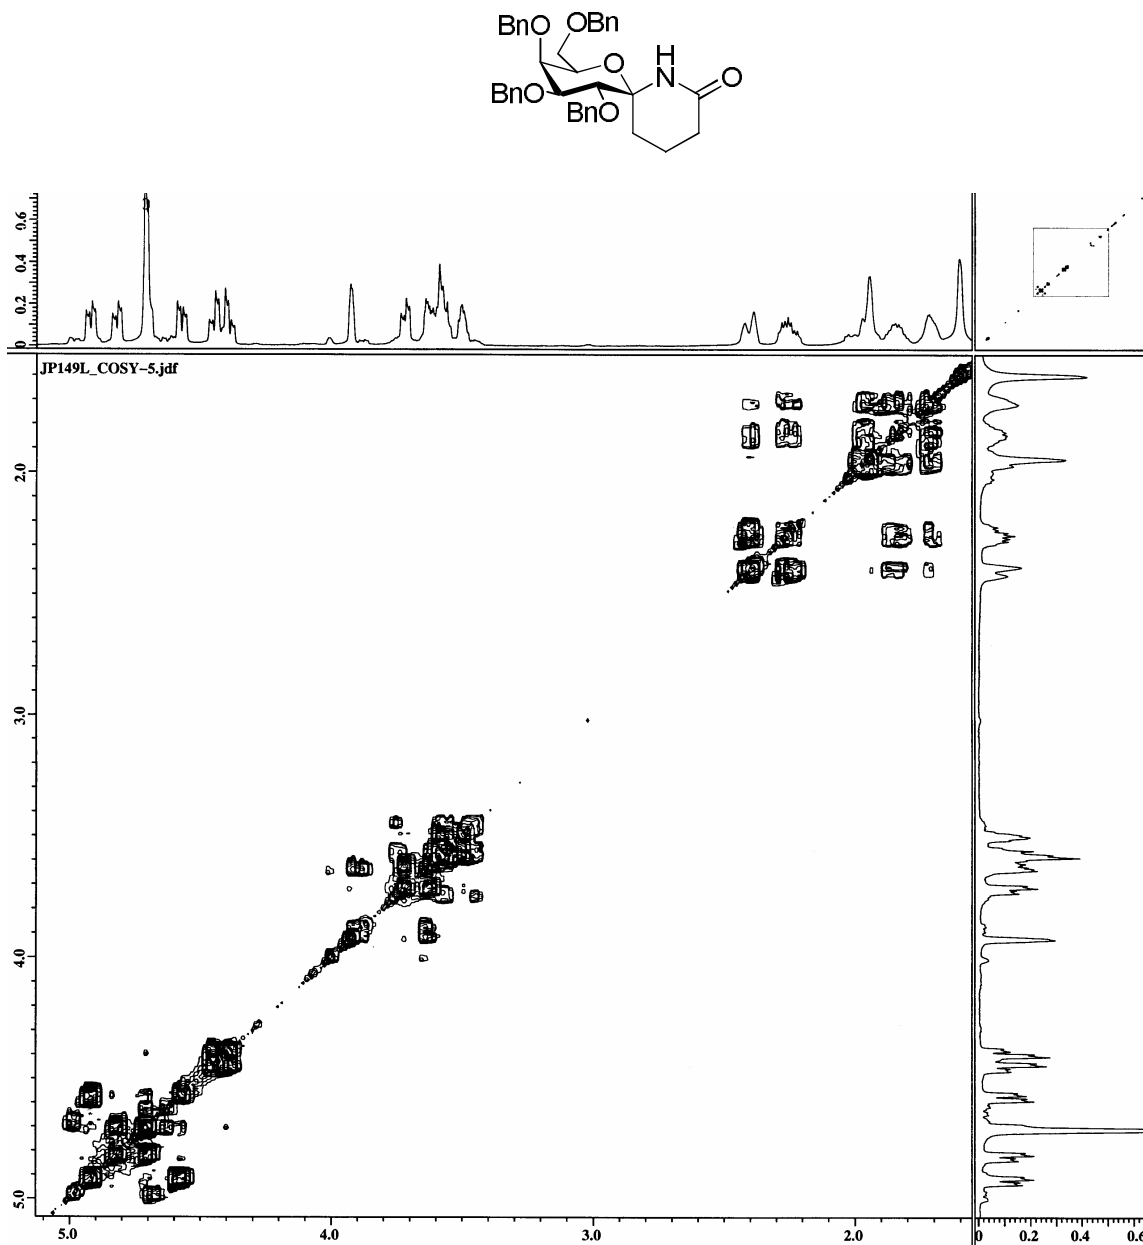

Figure 18:  $^1\text{H}$ - $^1\text{H}$  COSY (500 MHz) spectrum of compound **24b**

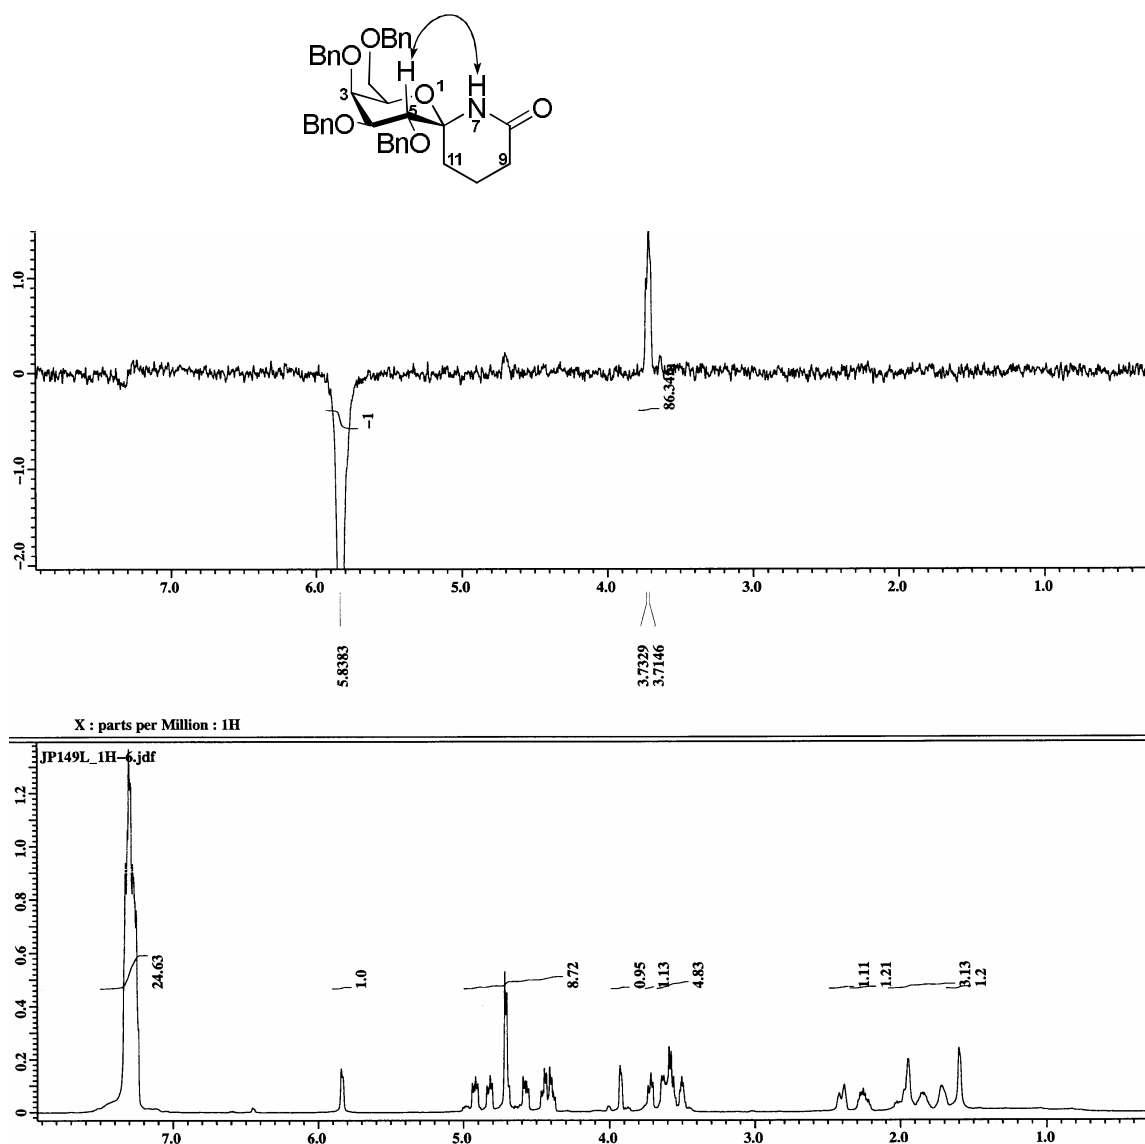

**Figure 19:** nOe (irradiation of -NH) spectrum of compound **24b**

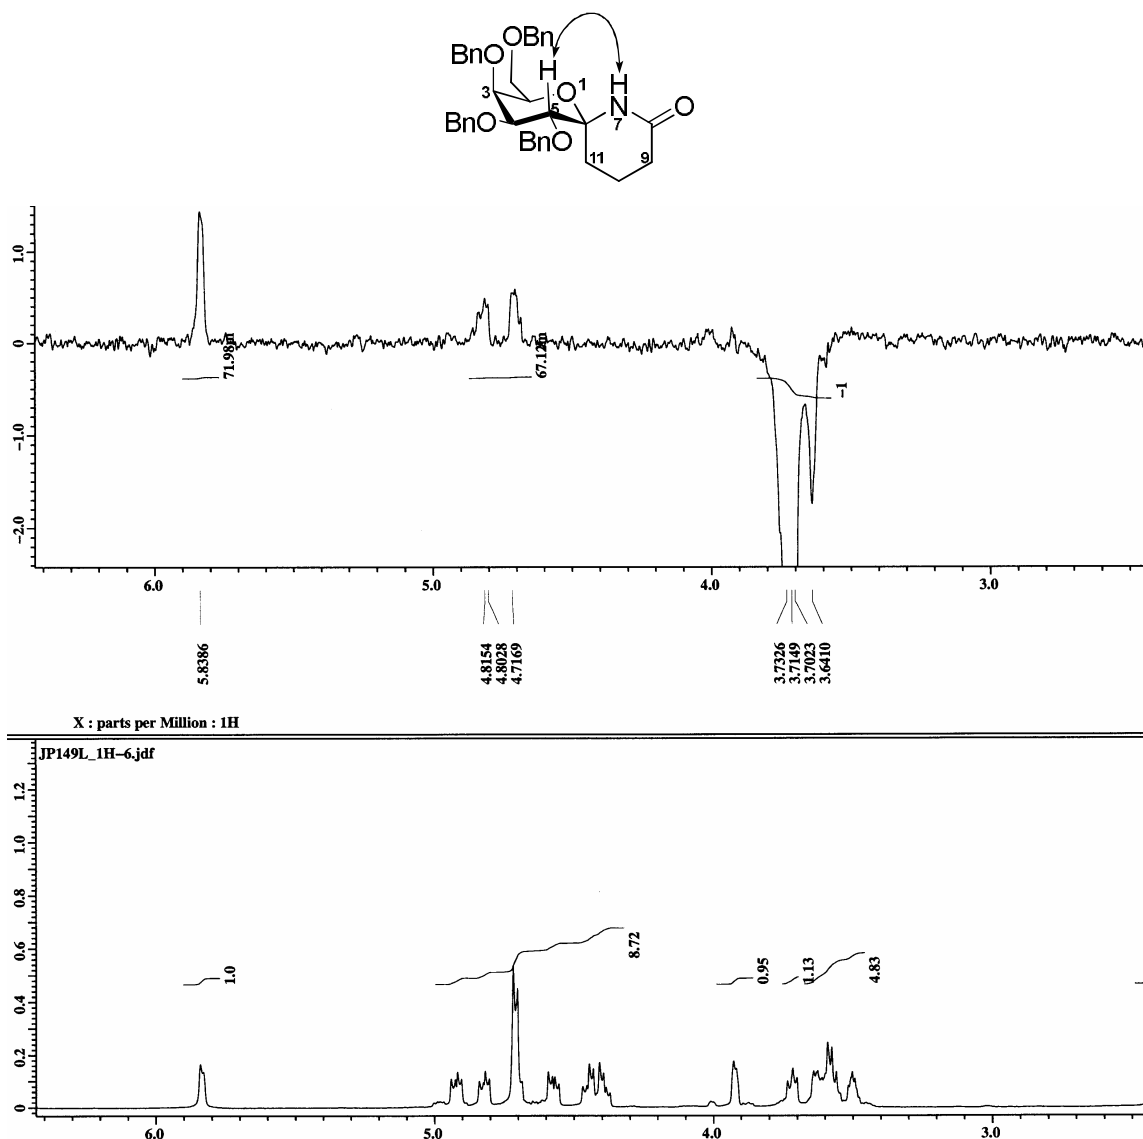

**Figure 20:** nOe (irradiation of H-5) spectrum of compound **24b**

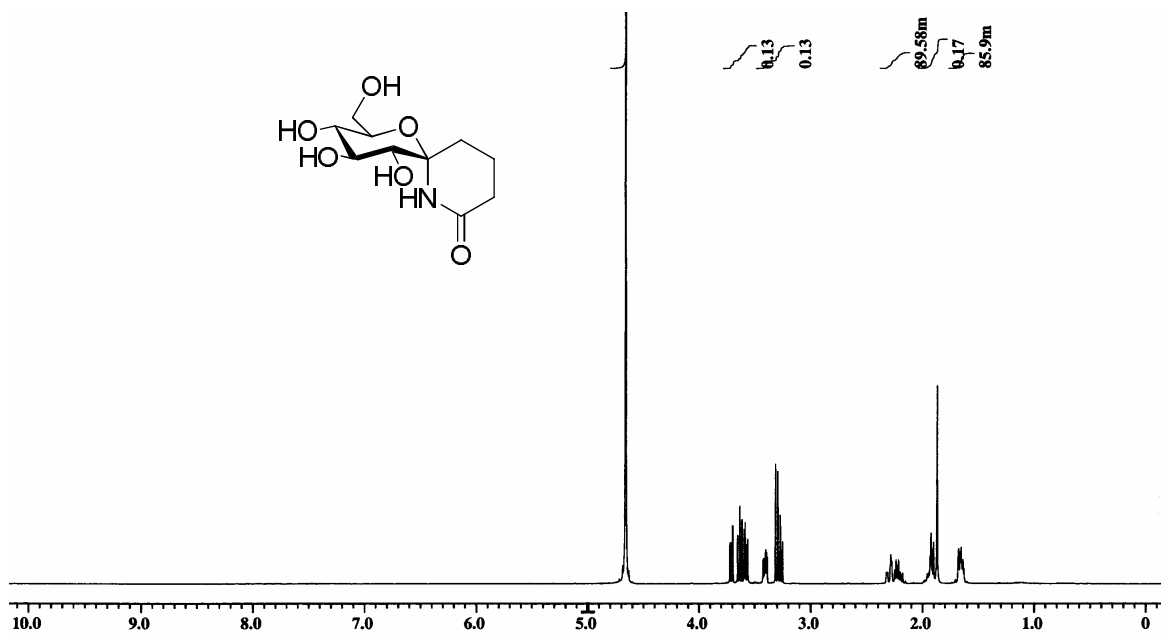

**Figure 21:** <sup>1</sup>H NMR (500 MHz) spectrum of compound **25a**

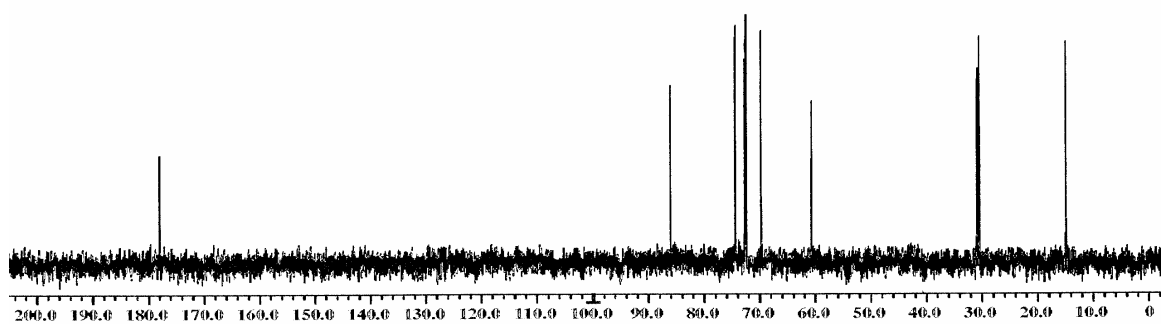

**Figure 22:** <sup>13</sup>C NMR (500 MHz) spectrum of compound **25a**



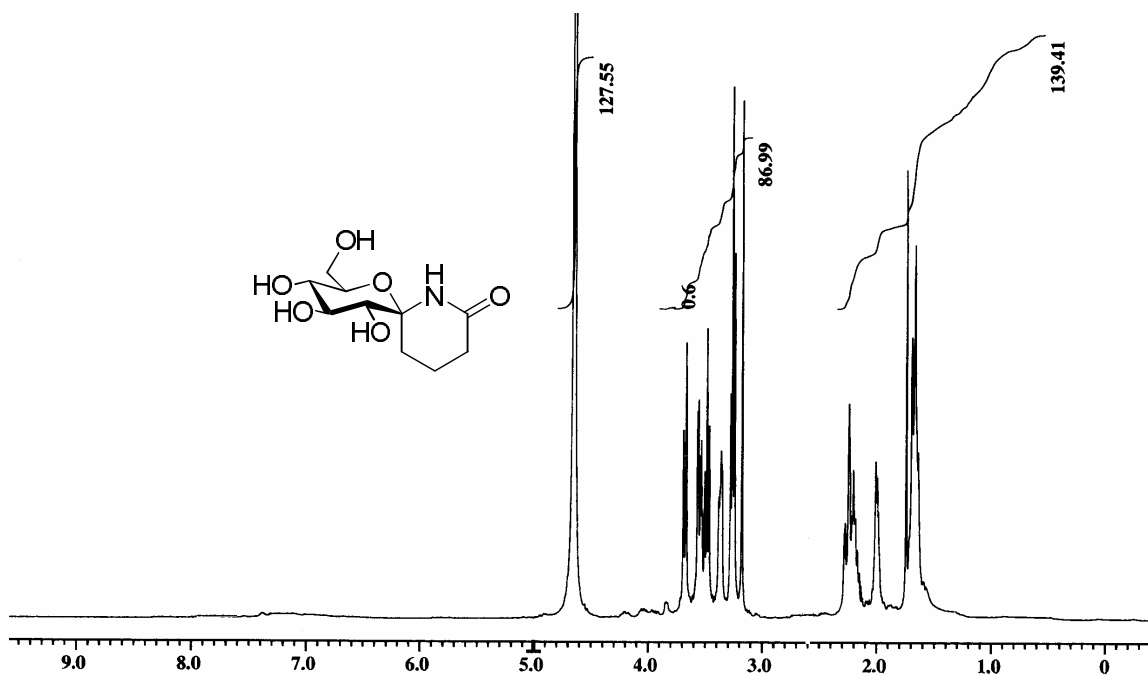

Figure 23:  $^1\text{H}$  NMR (500 MHz) spectrum of compound 25b

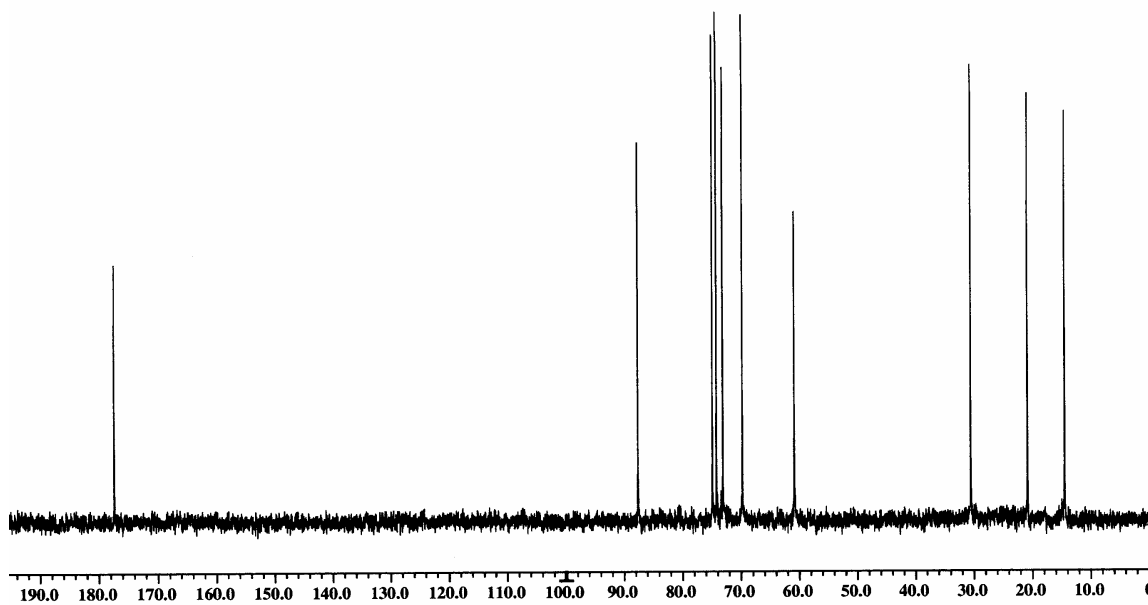

Figure 24:  $^{13}\text{C}$  NMR (500 MHz) spectrum of compound 25b

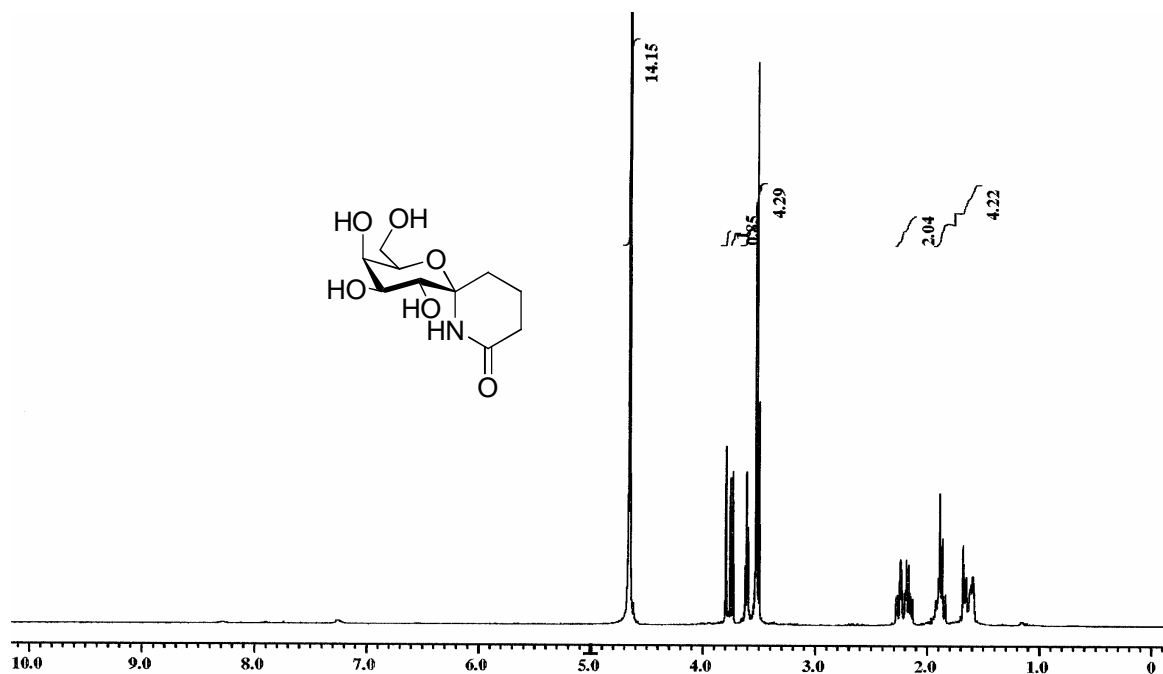

**Figure 25:**  $^1\text{H}$  NMR (500 MHz) spectrum of compound **26a**

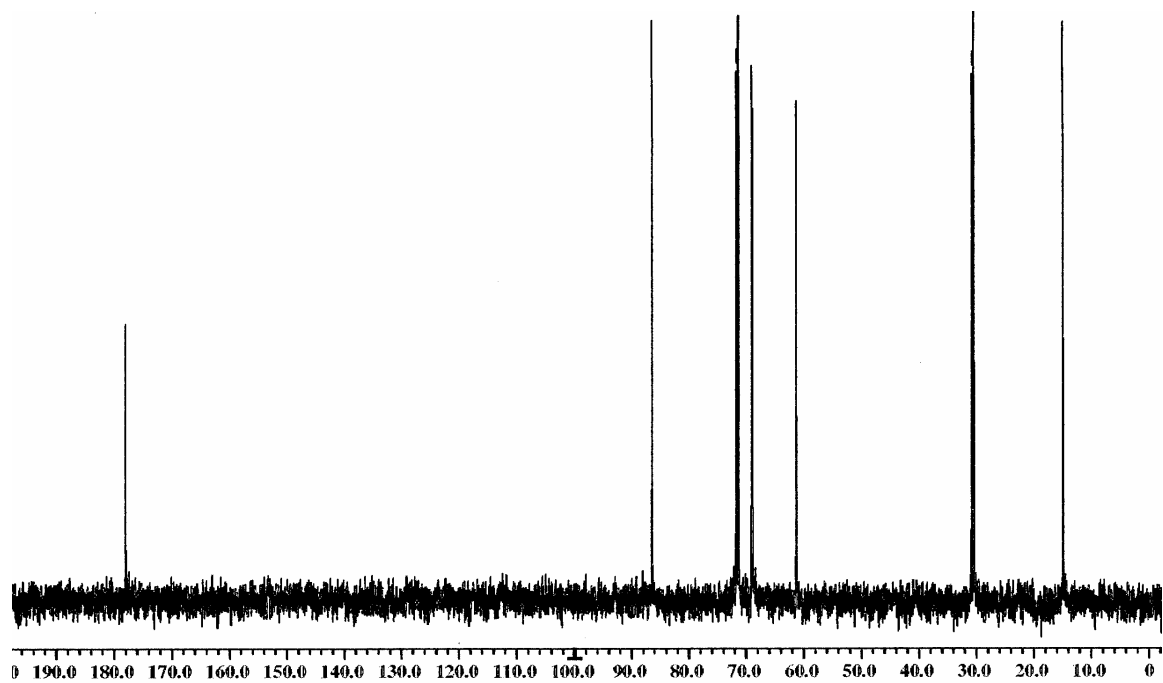

**Figure 26:**  $^{13}\text{C}$  NMR (500 MHz) spectrum of compound **26a**

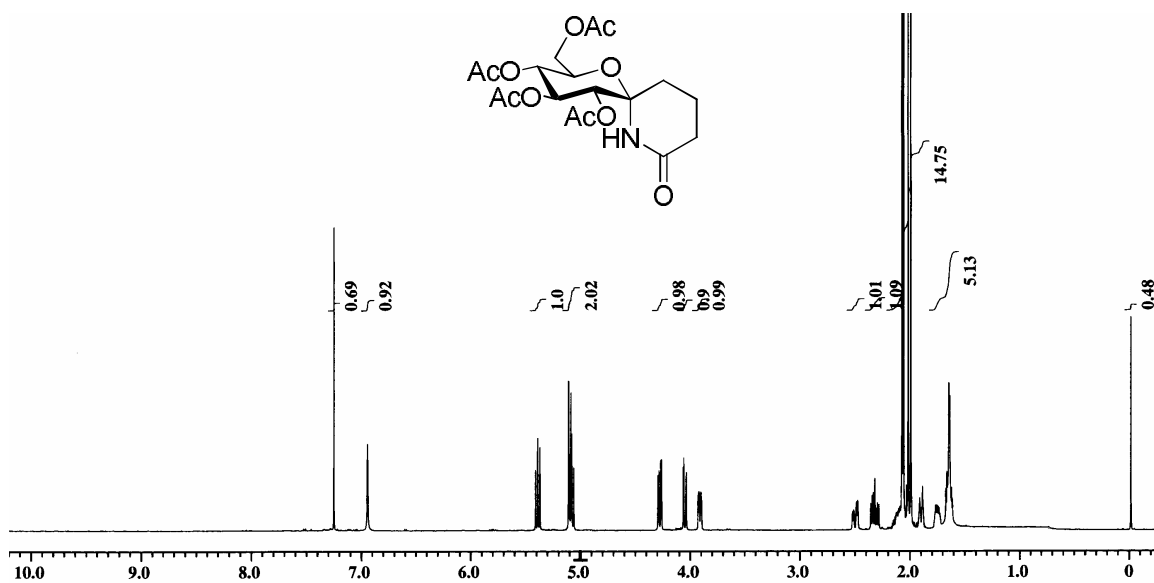

**Figure 27:** <sup>1</sup>H NMR (500 MHz) spectrum of compound 27a

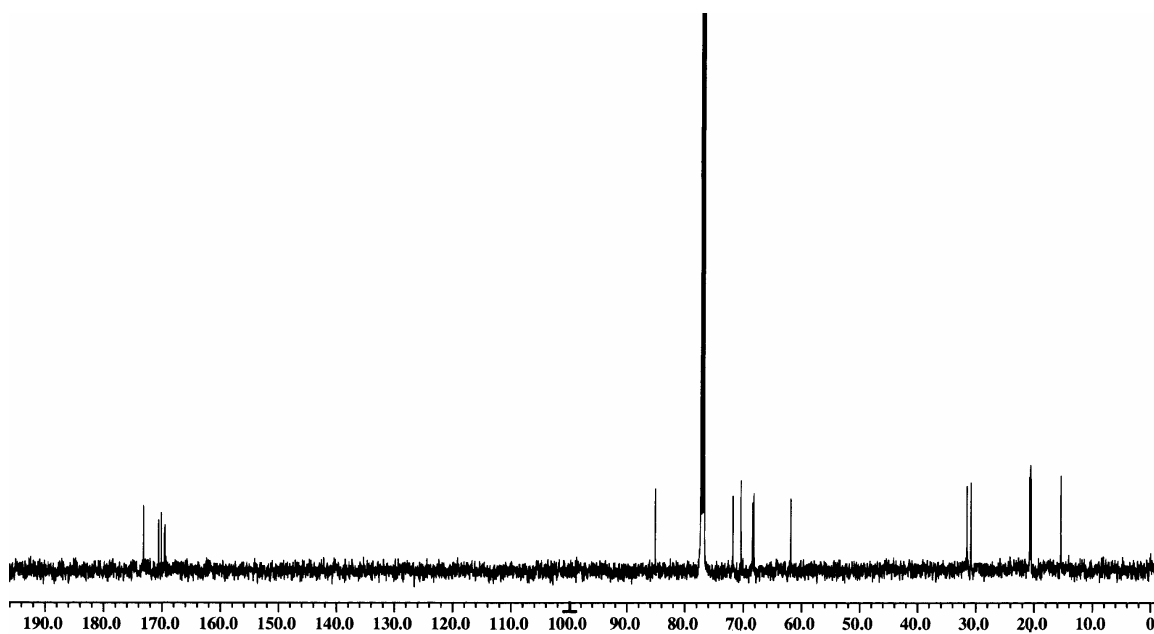

**Figure 28:** <sup>13</sup>C NMR (500 MHz) spectrum of compound 27a

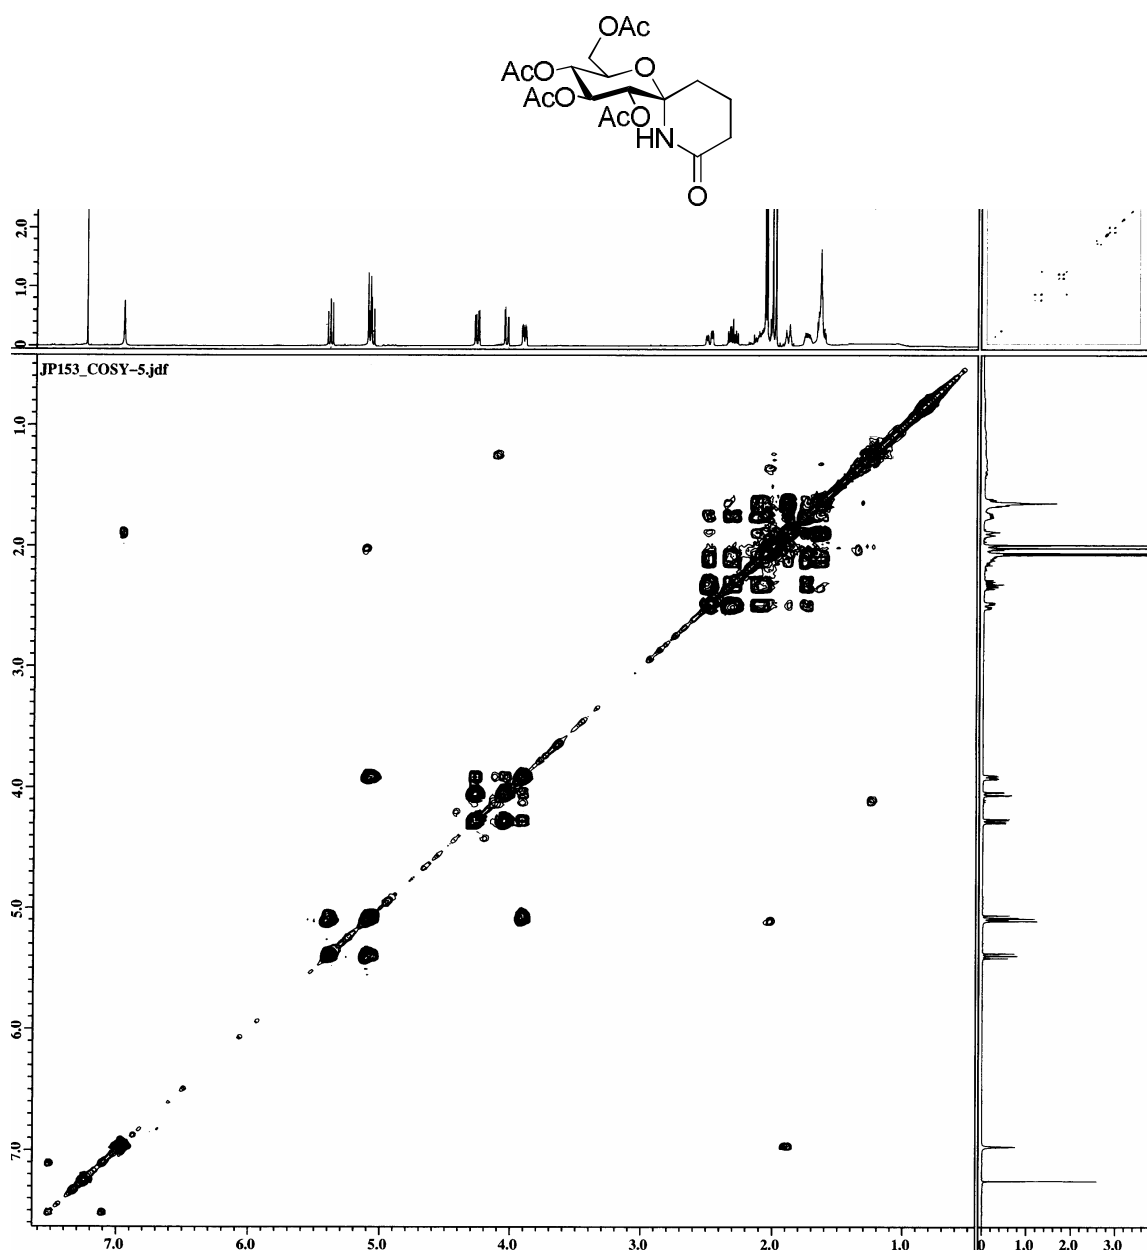

Figure 29:  $^1\text{H}$ - $^1\text{H}$  COSY (500 MHz) spectrum of compound 27a

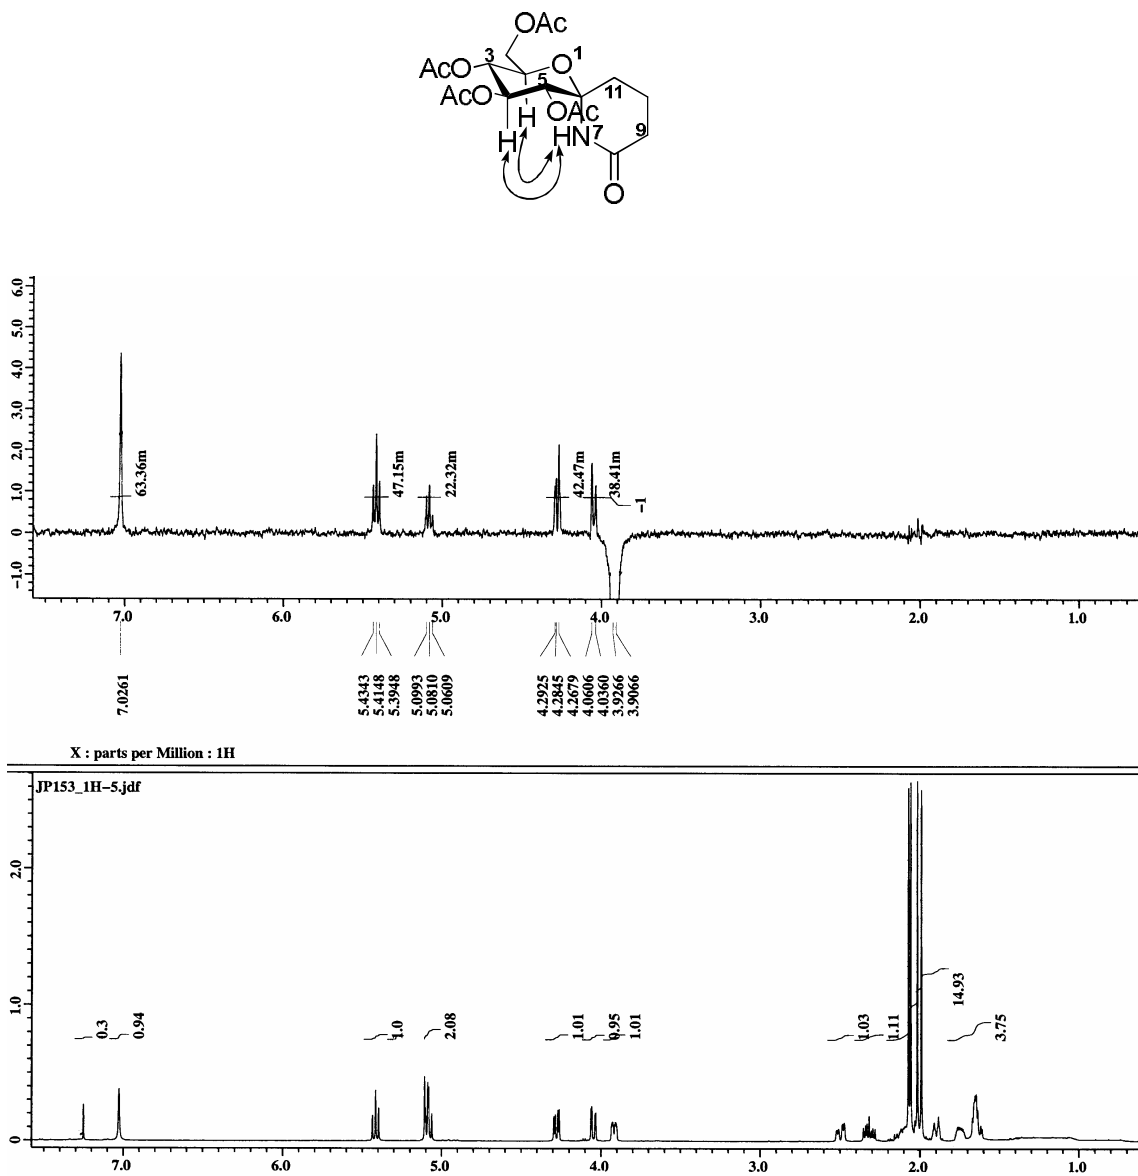

**Figure 30:** nOe (irradiation of H-2) spectrum of compound **27a**  
(Vicinal enhancements were not highlighted in the structure)

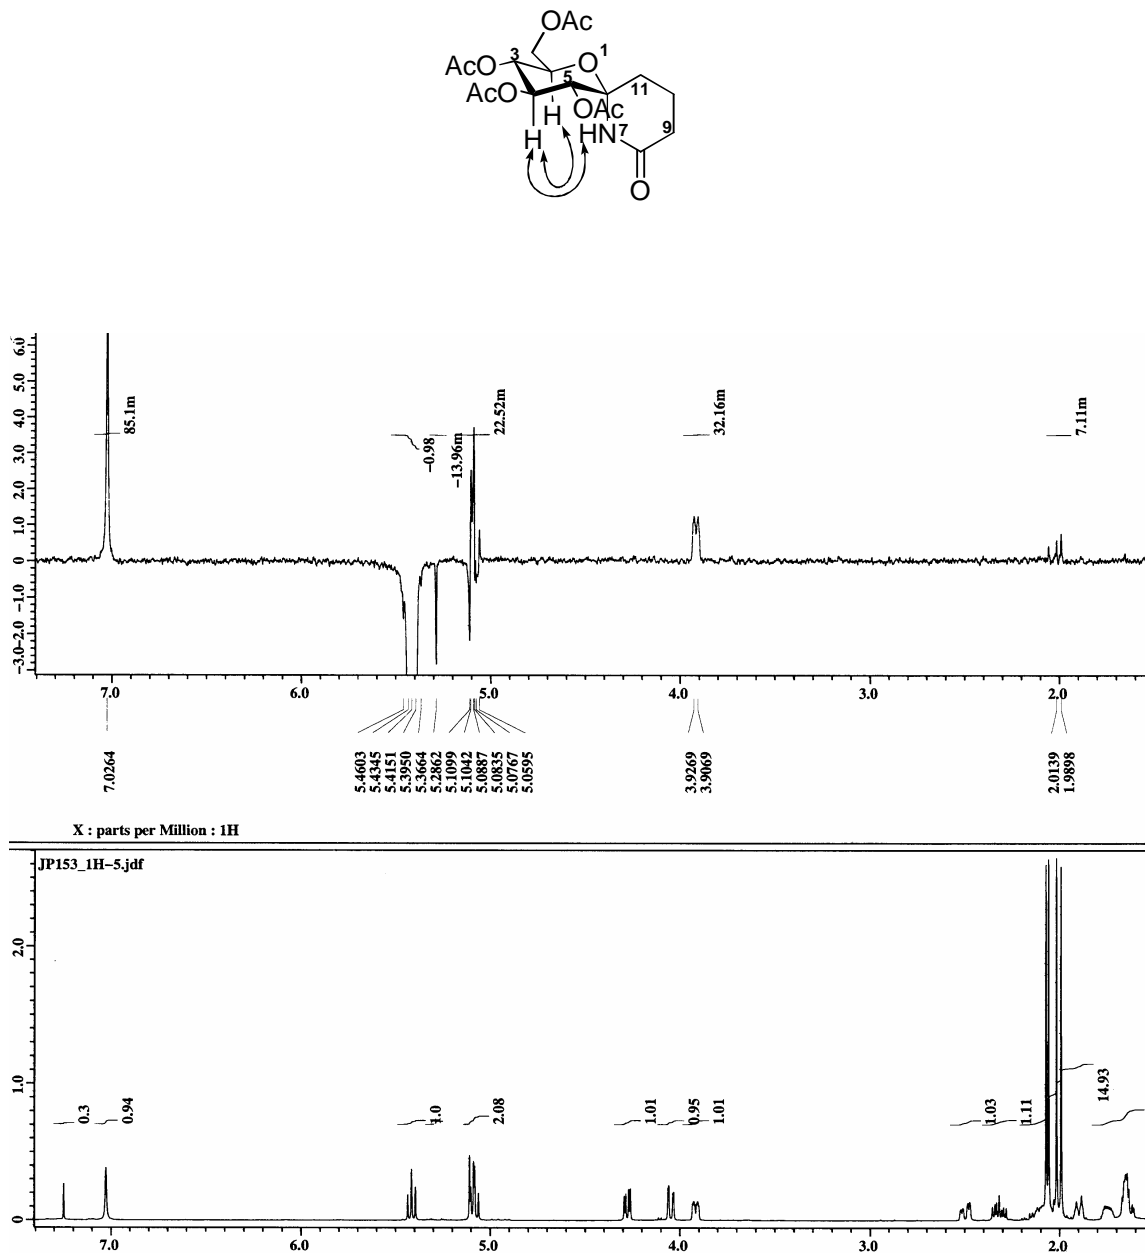

**Figure 31:** nOe (irradiation of H-4) spectrum of compound **27a**

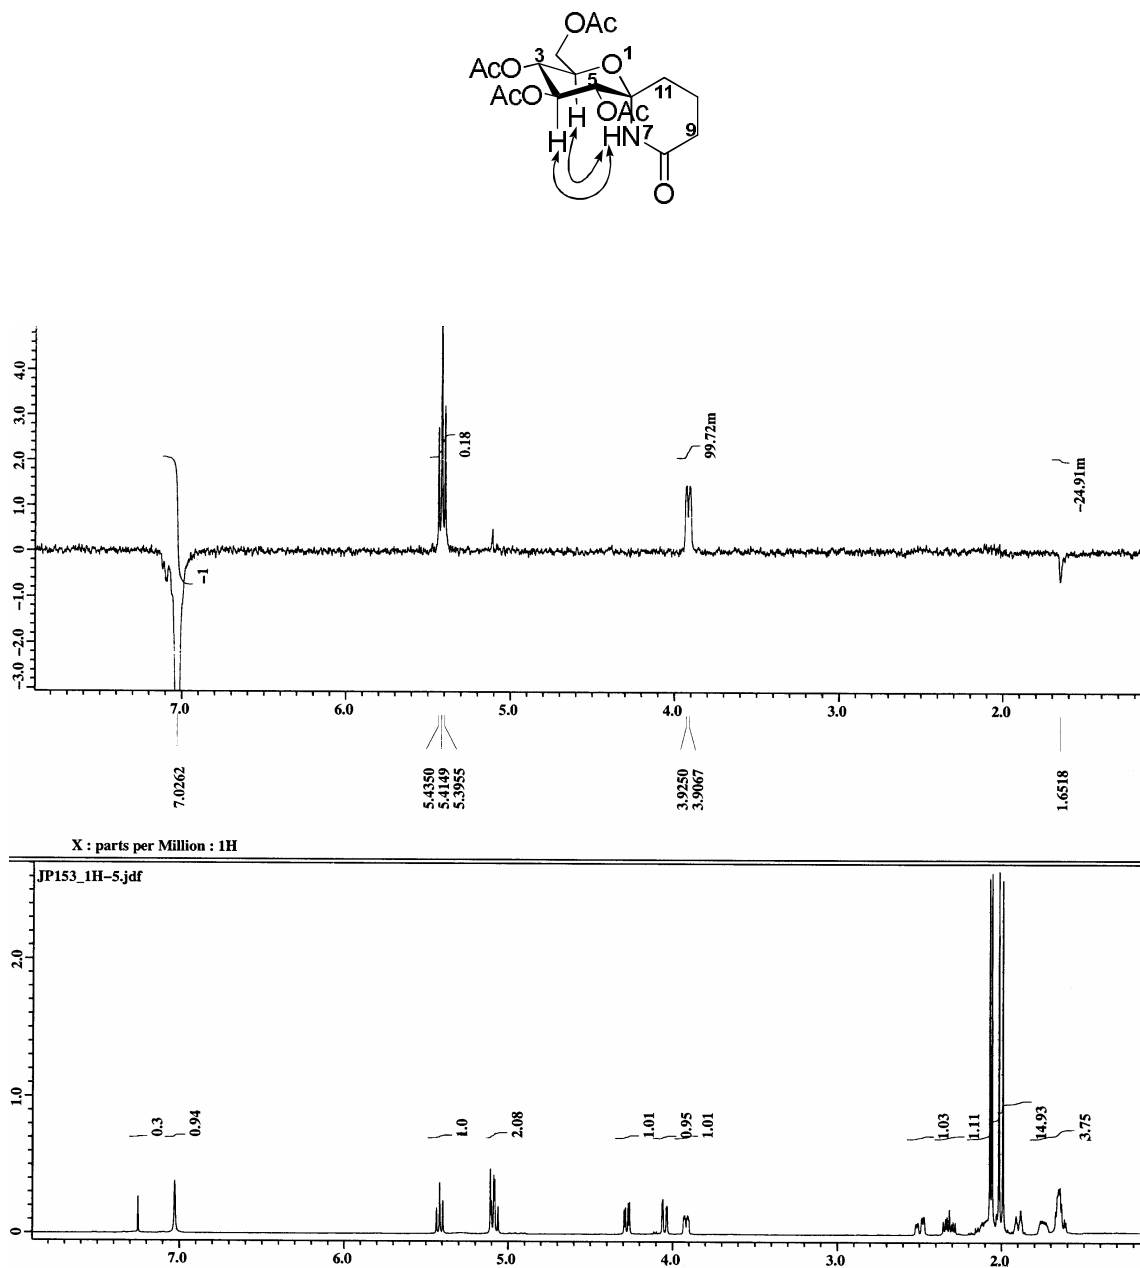

**Figure 32:** nOe (irradiation of -NH) spectrum of compound **27a**

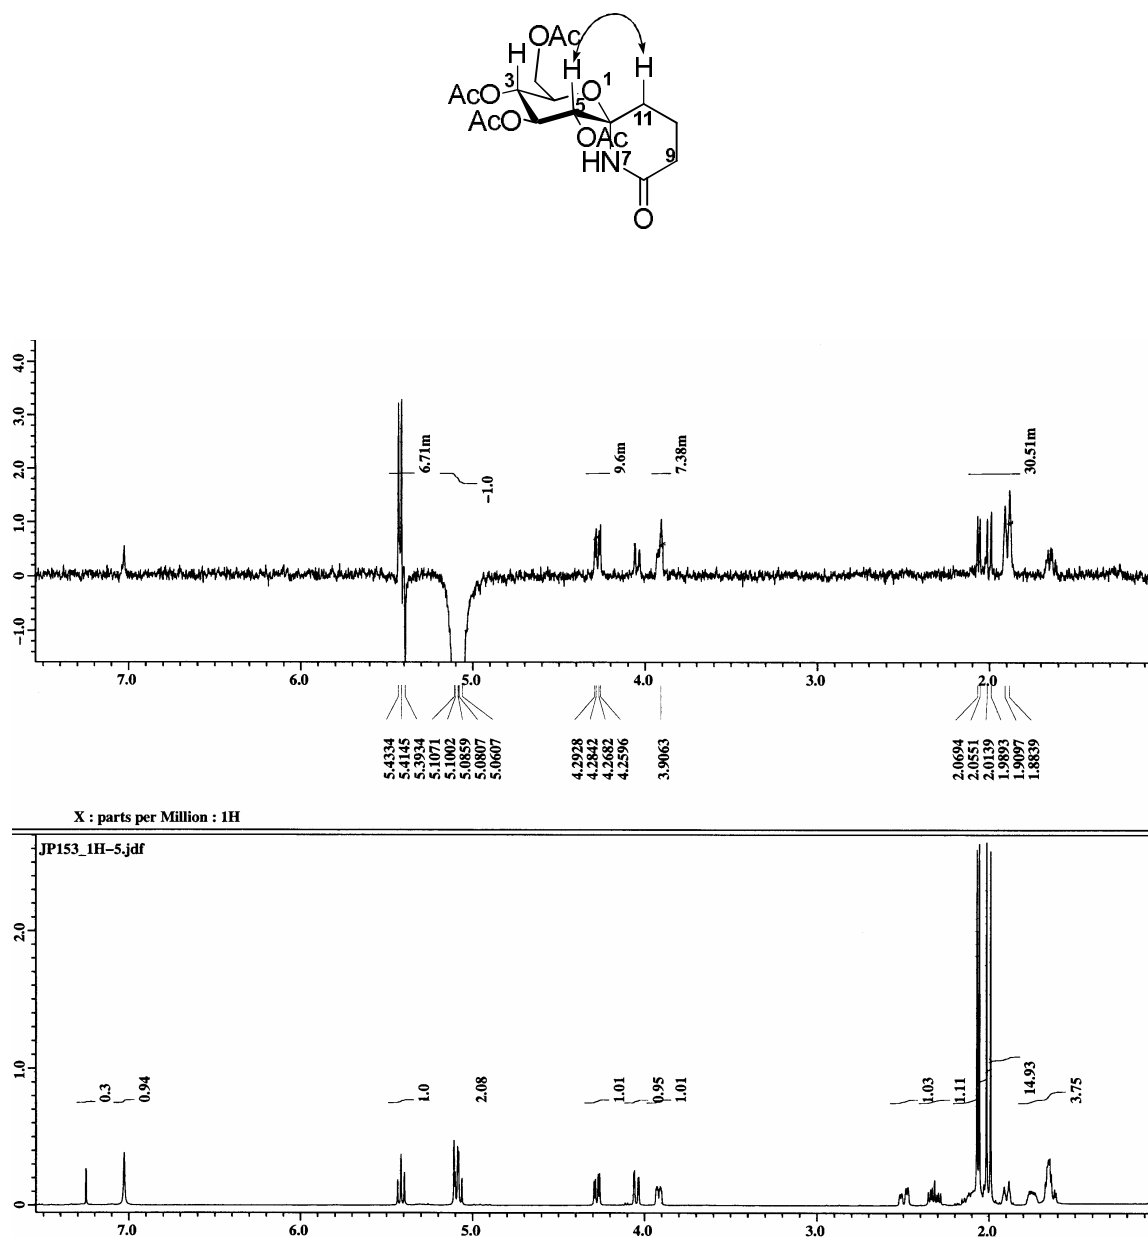

**Figure 33:** nOe (irradiation of H-3 and H-5) spectrum of compound **27a**  
(H-3 enhanced the  $-\text{CH}_2\text{OAc}$  group protons, which were not highlighted in the structure)



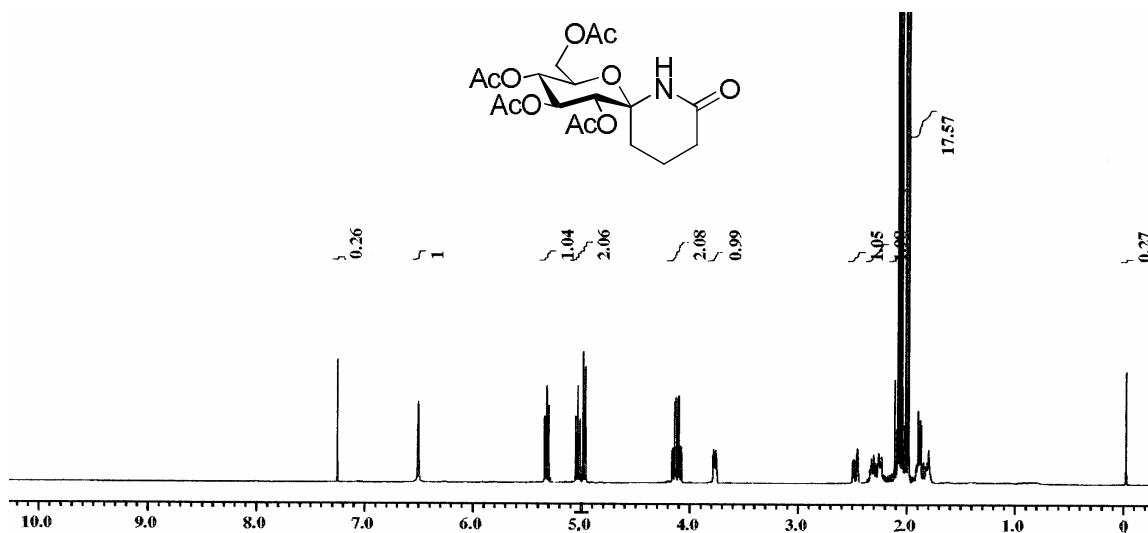

**Figure 34:** <sup>1</sup>H NMR (500 MHz) spectrum of compound **27b**

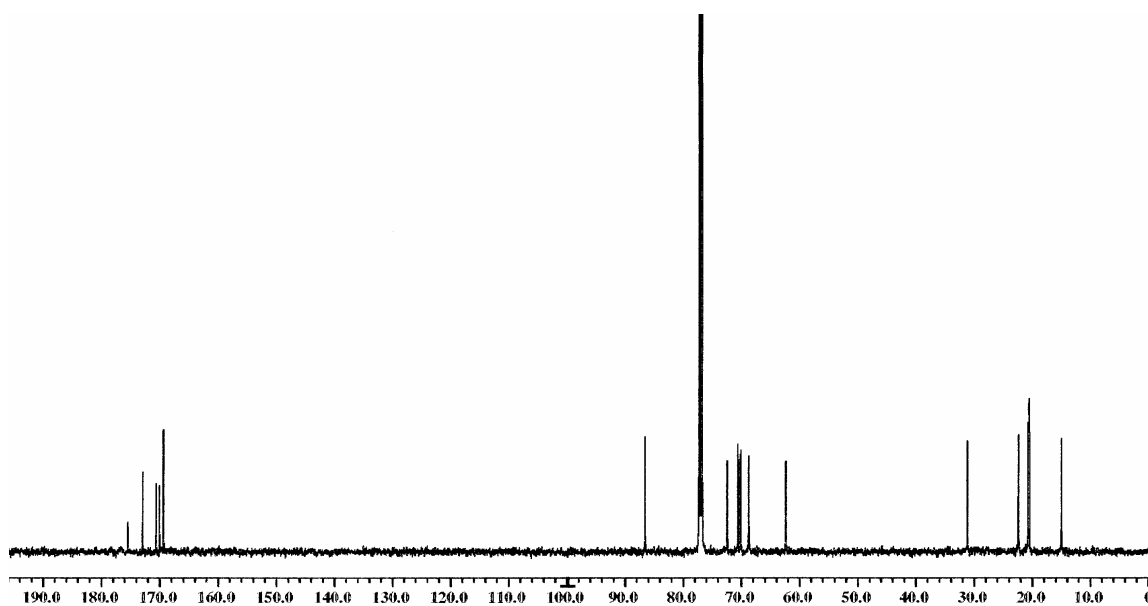

**Figure 35:** <sup>13</sup>C NMR (500 MHz) spectrum of compound **27b**

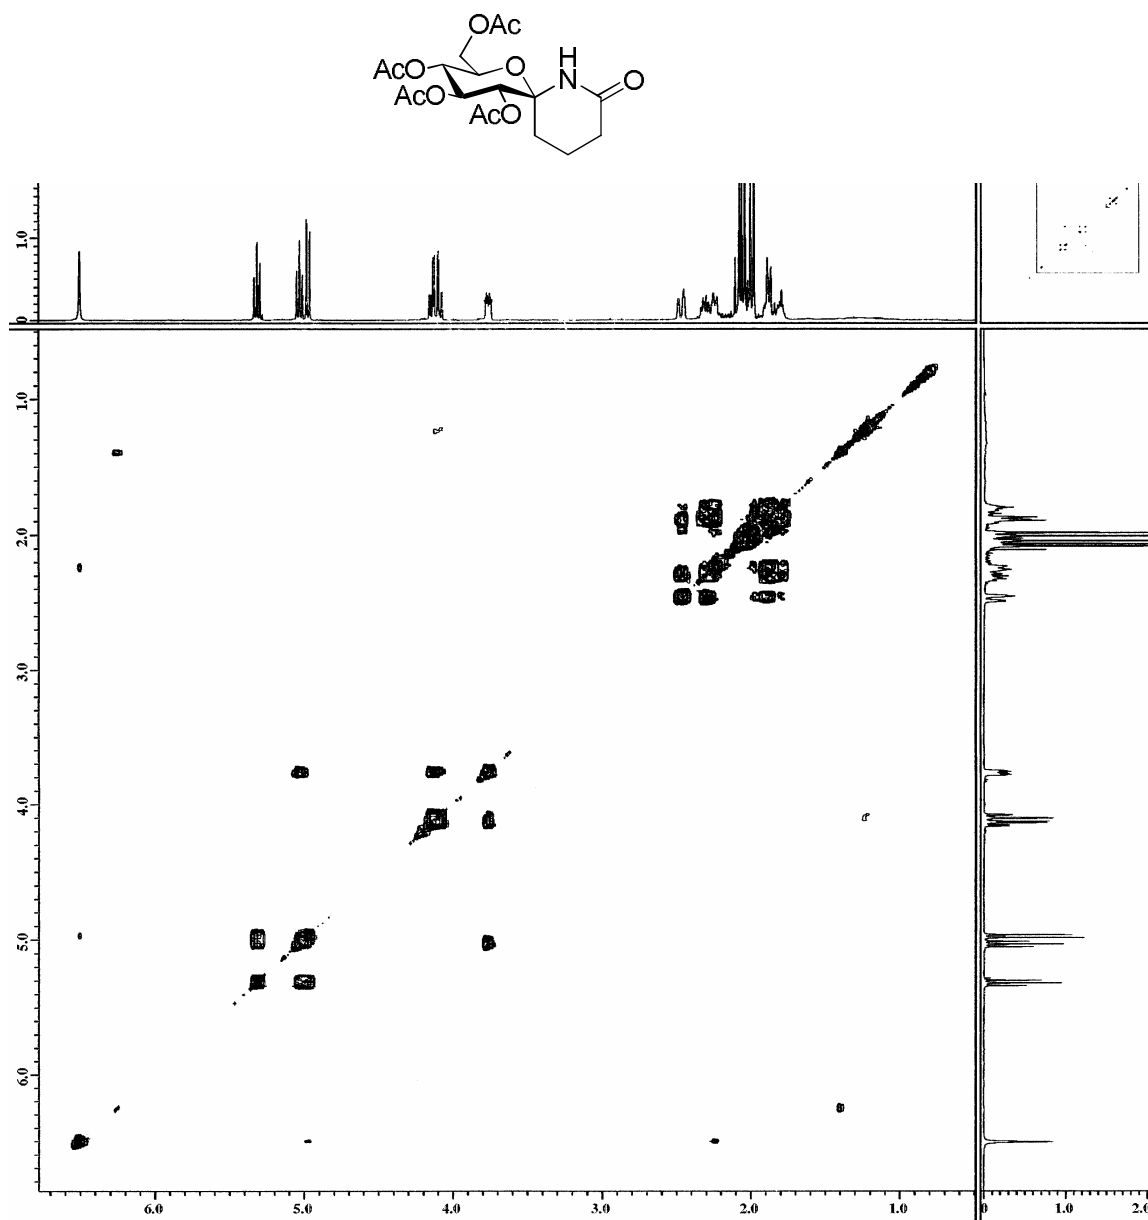

**Figure 36:**  $^1\text{H}$ - $^1\text{H}$  COSY (500 MHz) spectrum of compound **27b**

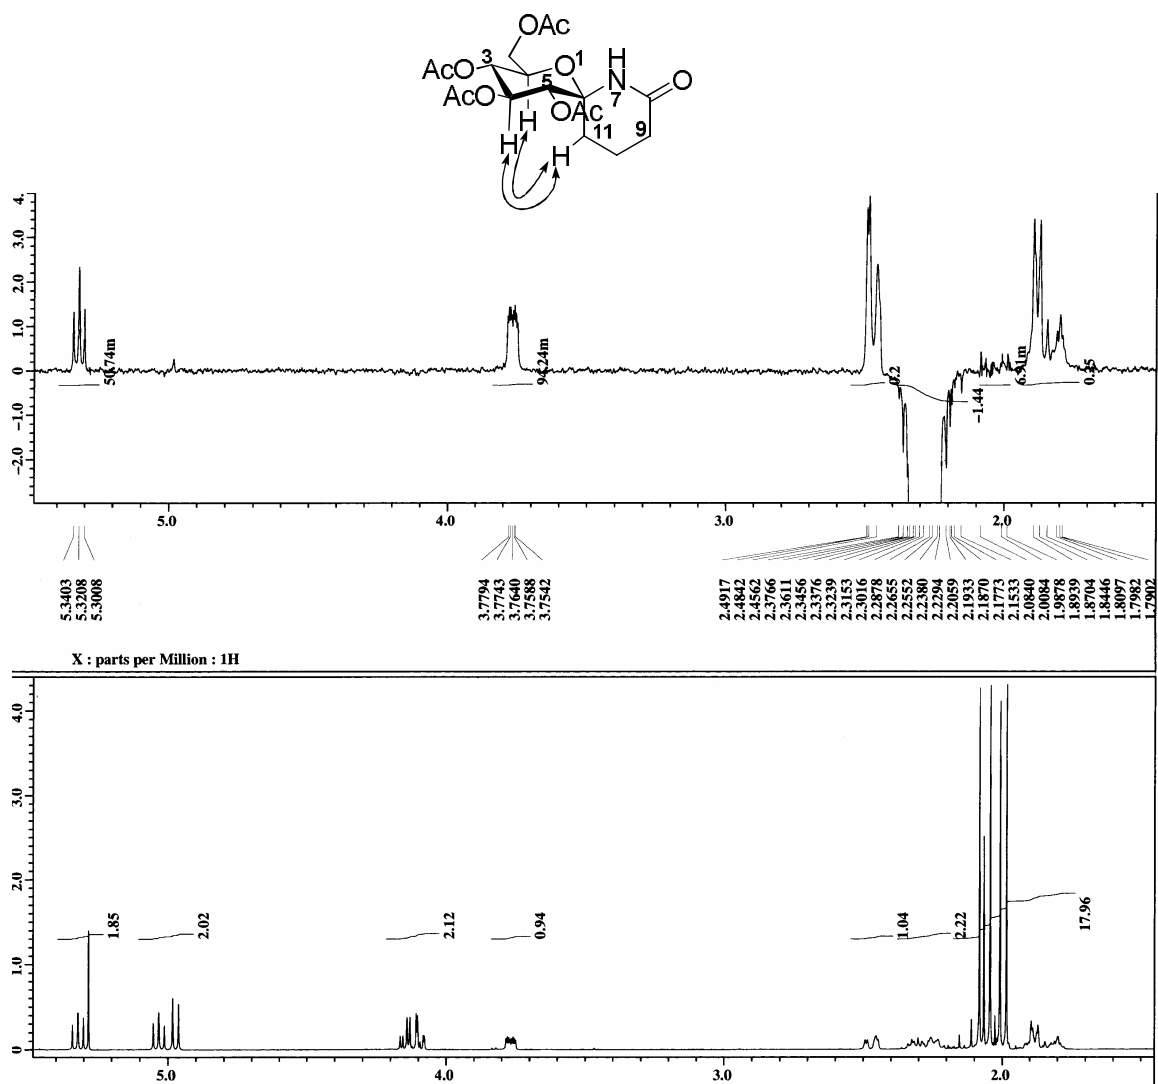

**Figure 37:** nOe (irradiation of H-11) spectrum of compound **27b**

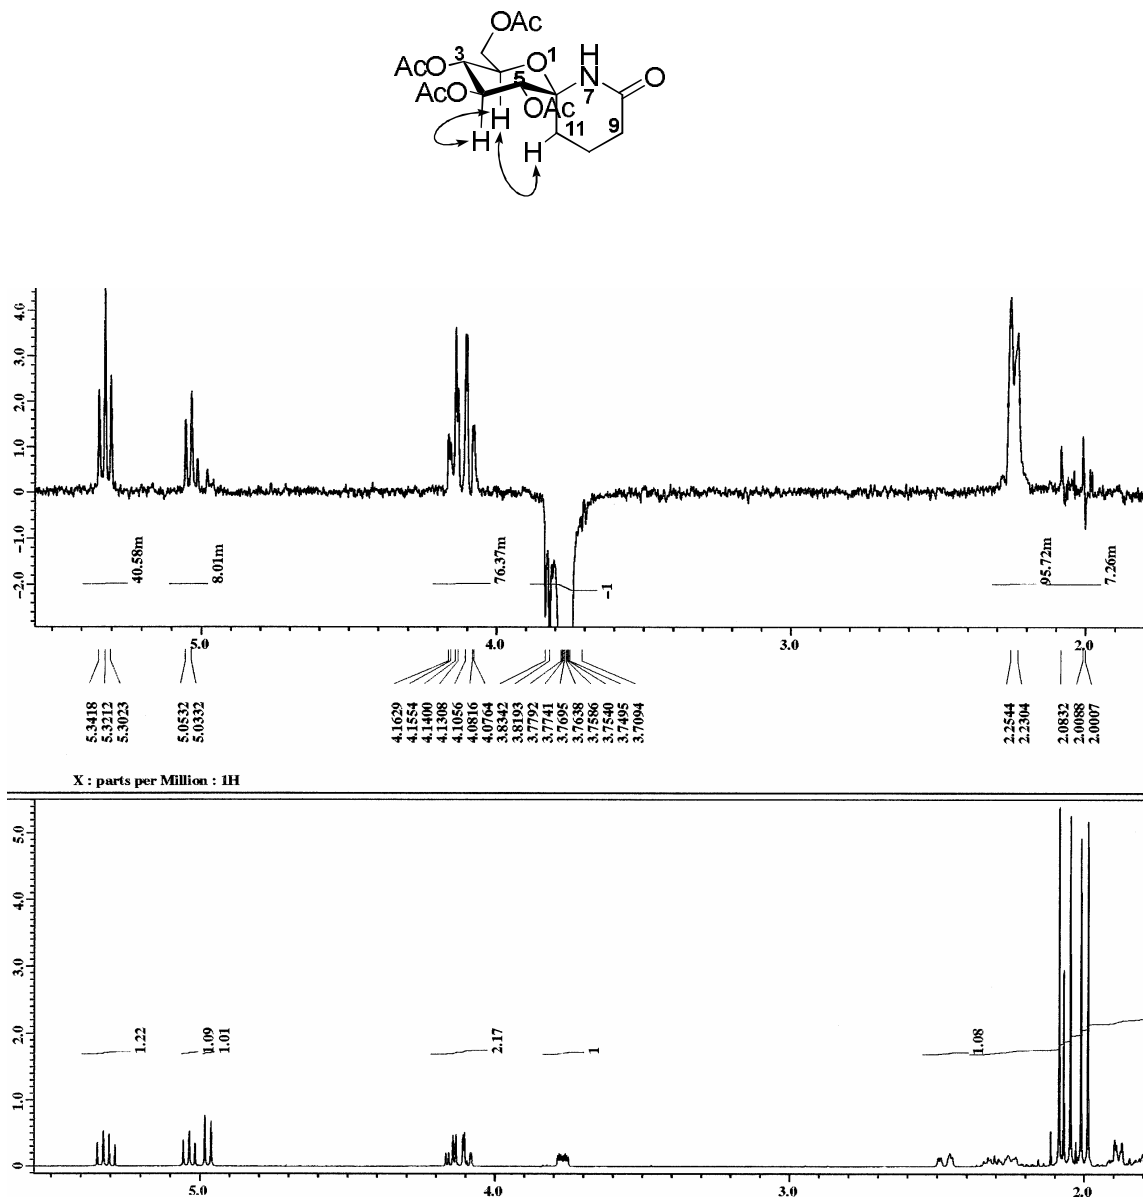

**Figure 38:** nOe (irradiation of H-2) spectrum of compound **27b**  
(Vicinal enhancements were not highlighted in the structure)

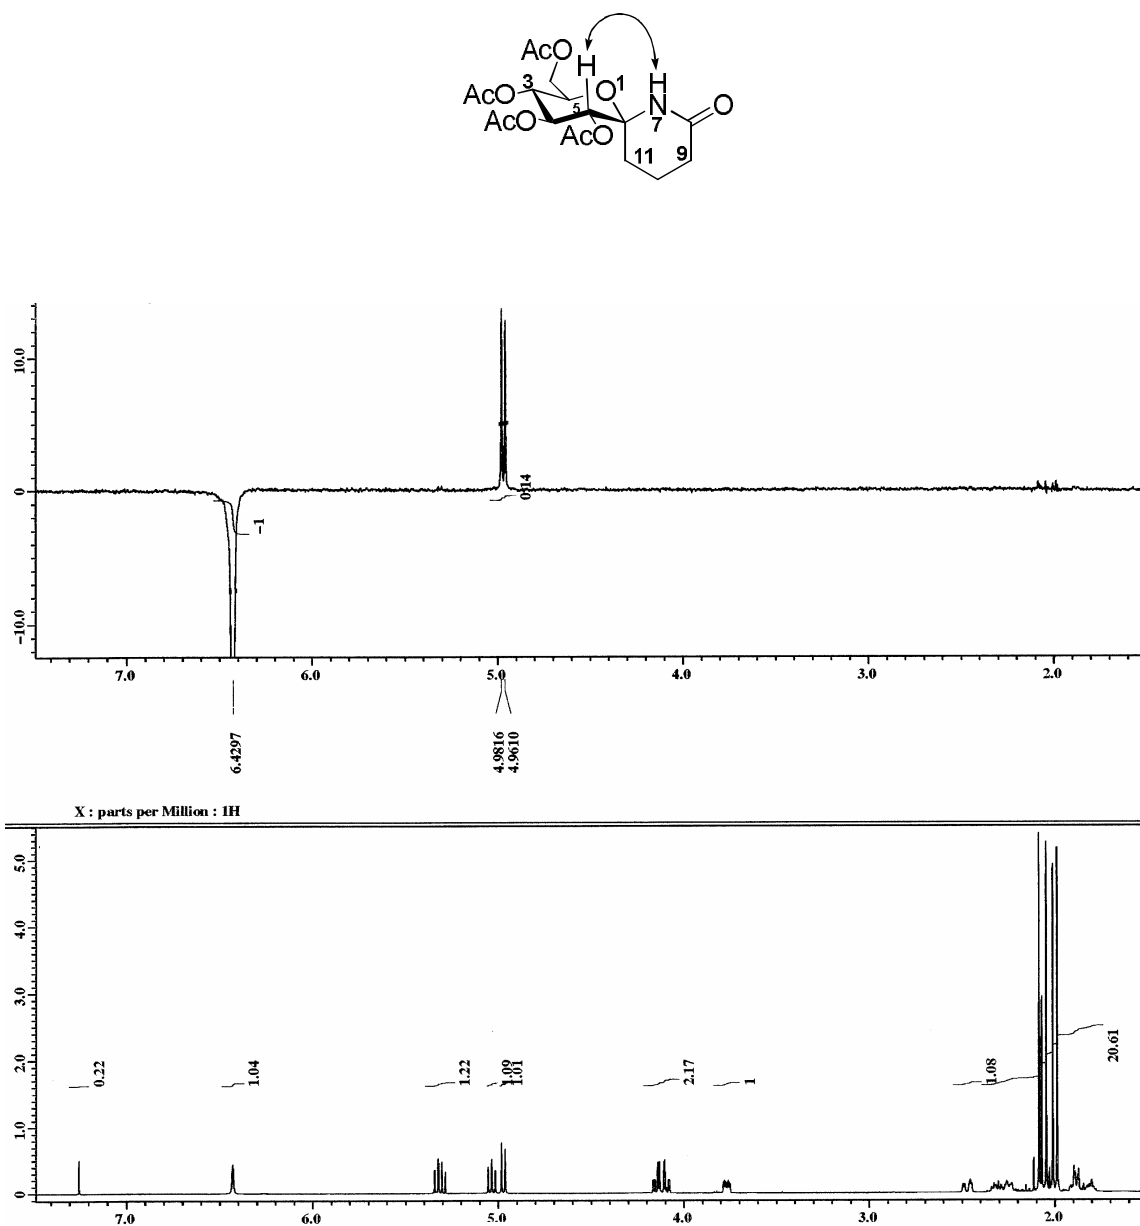

**Figure 39:** nOe (irradiation of -NH) spectrum of compound **27b**

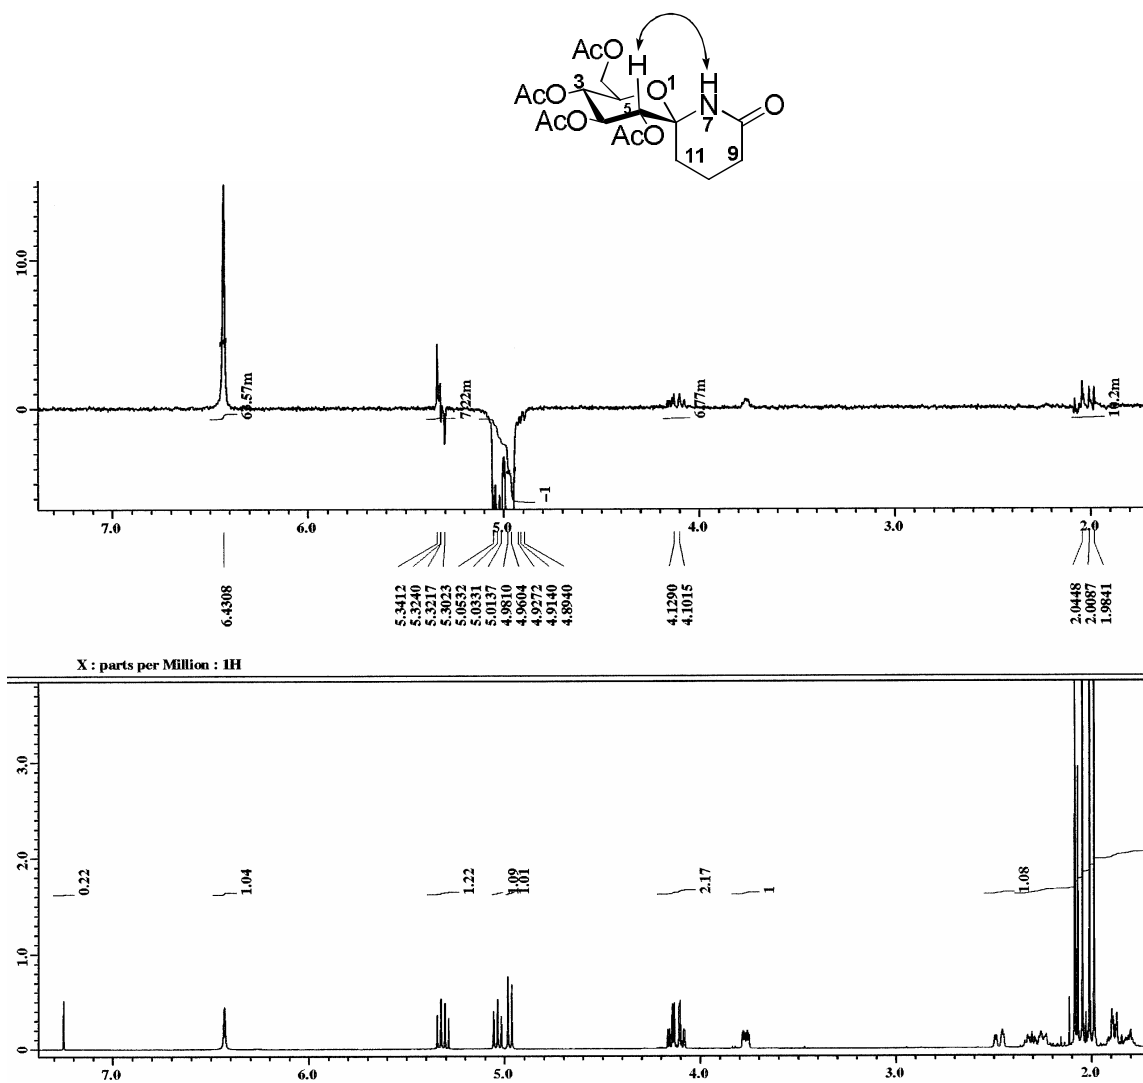

Figure 40: nOe (irradiation of H-5) spectrum of compound 27b

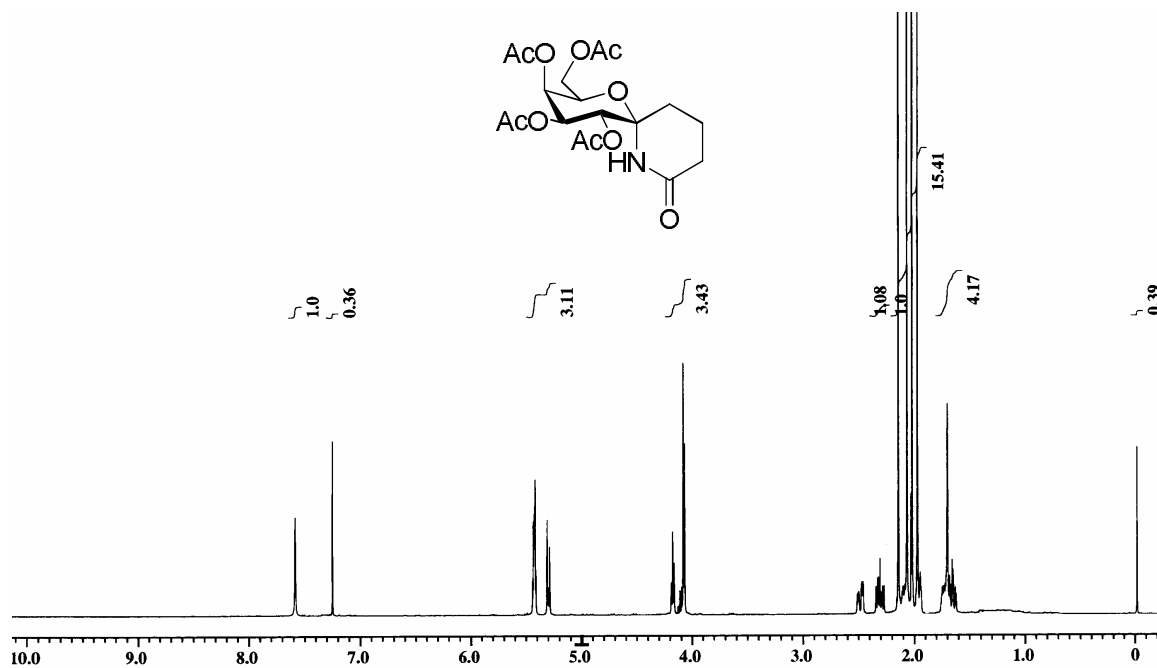

**Figure 41:**  $^1\text{H}$  NMR (500 MHz) spectrum of compound 28a

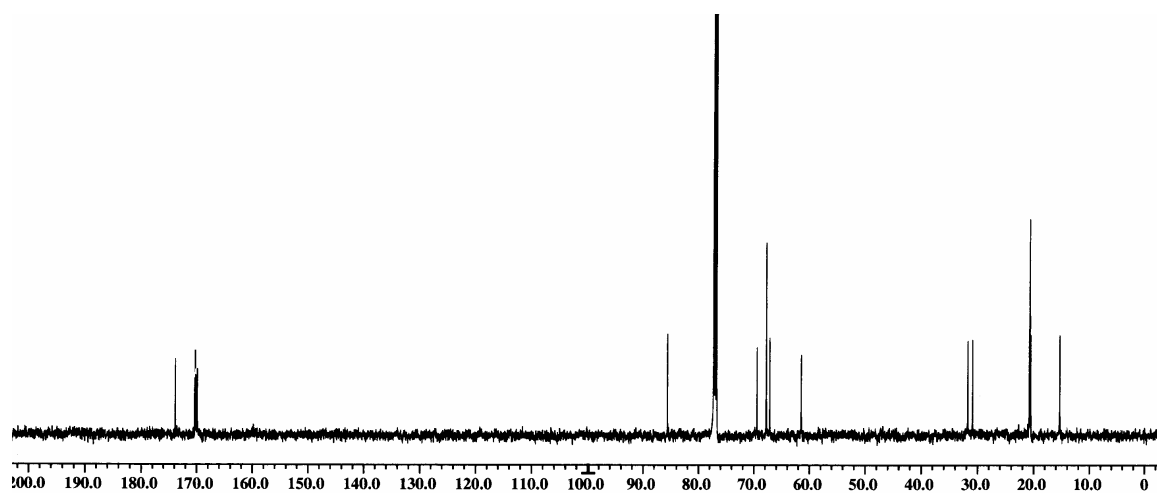

**Figure 42:**  $^{13}\text{C}$  NMR (500 MHz) spectrum of compound 28a

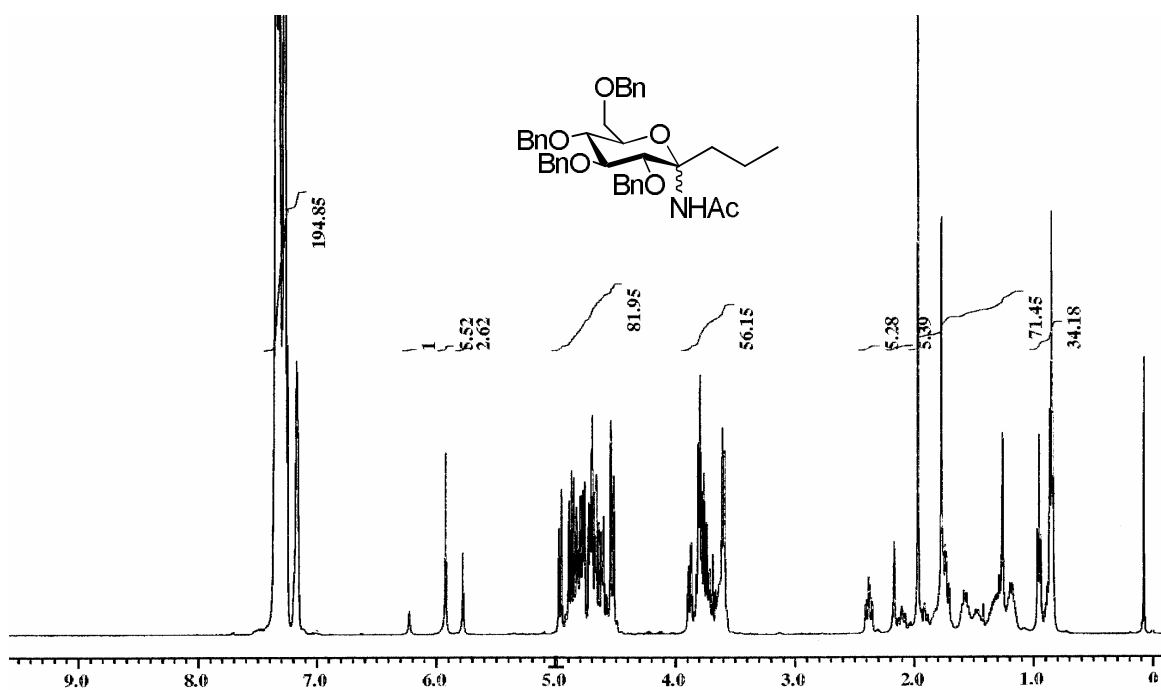

**Figure 43:** <sup>1</sup>H NMR (500 MHz) spectrum of compound **30**

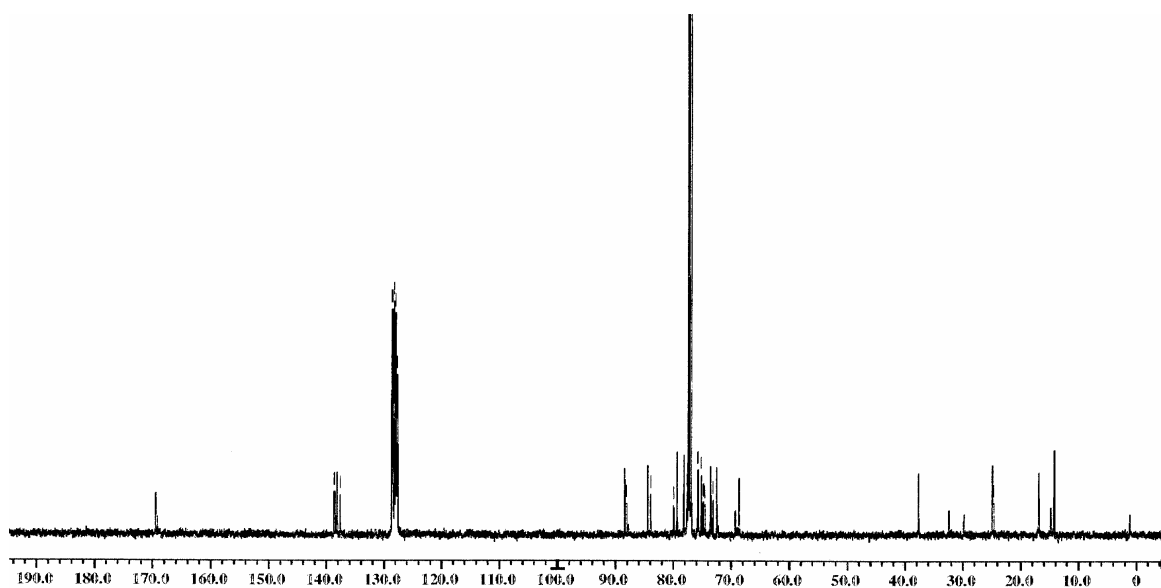

**Figure 44:** <sup>13</sup>C NMR (500 MHz) spectrum of compound **30**



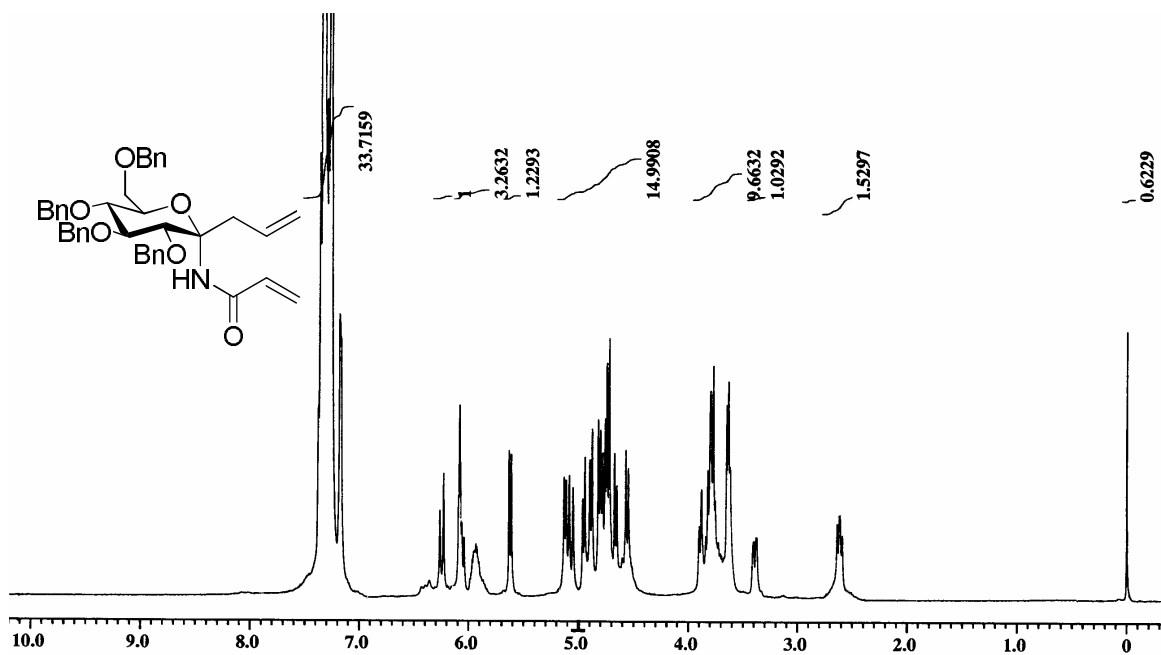

**Figure 45:** <sup>1</sup>H NMR (500 MHz) spectrum of compound 32a

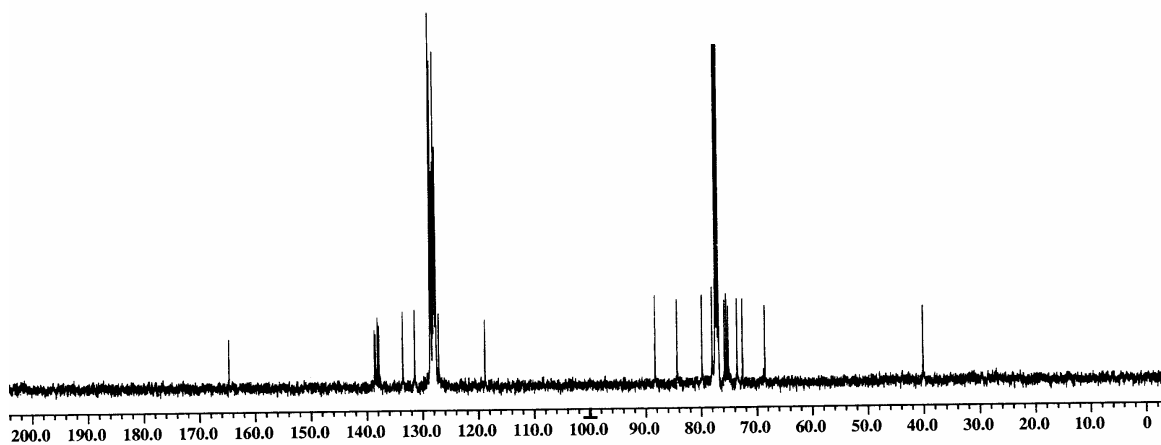

**Figure 46:** <sup>13</sup>C NMR (500 MHz) spectrum of compound 32a

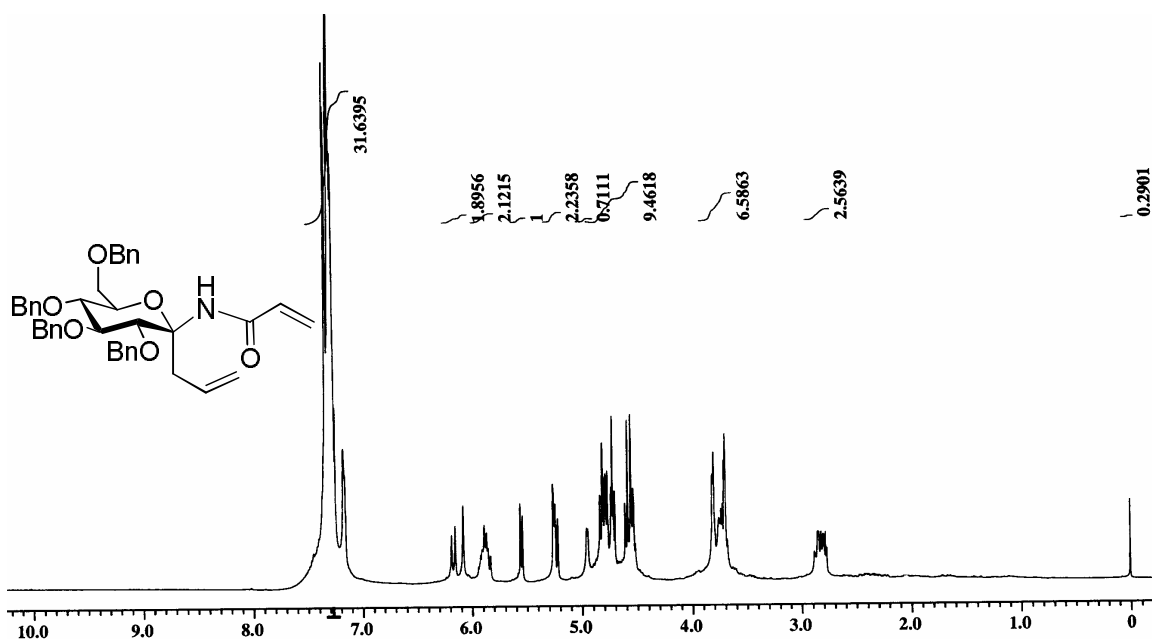

**Figure 47:**  $^1\text{H}$  NMR (500 MHz) spectrum of compound **32b**

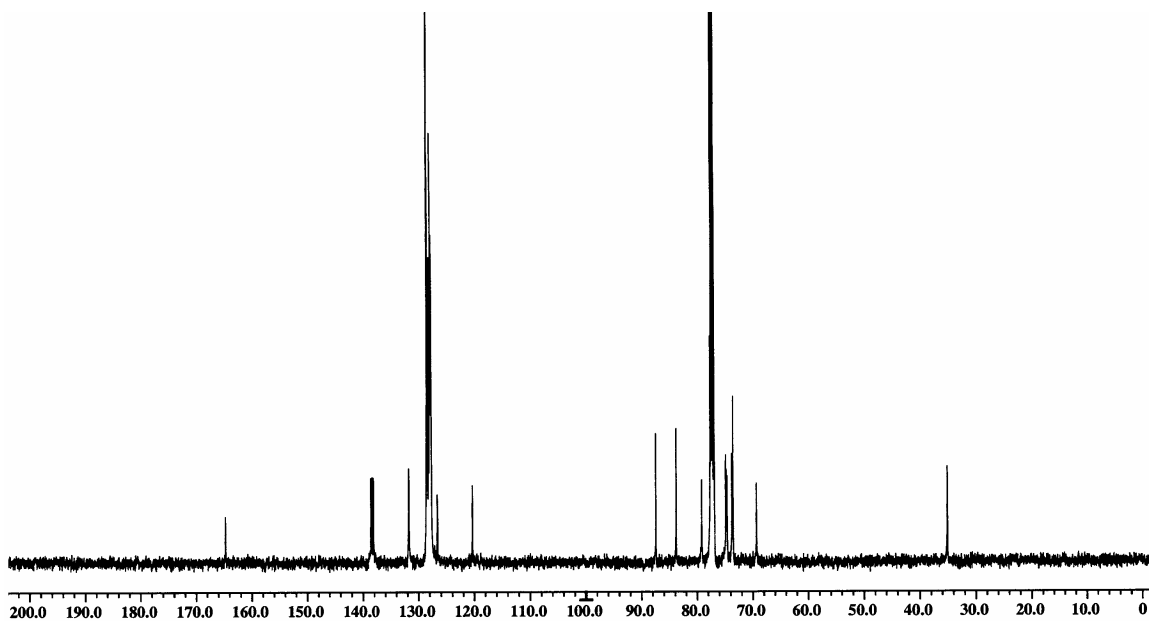

**Figure 48:**  $^{13}\text{C}$  NMR (500 MHz) spectrum of compound **32b**

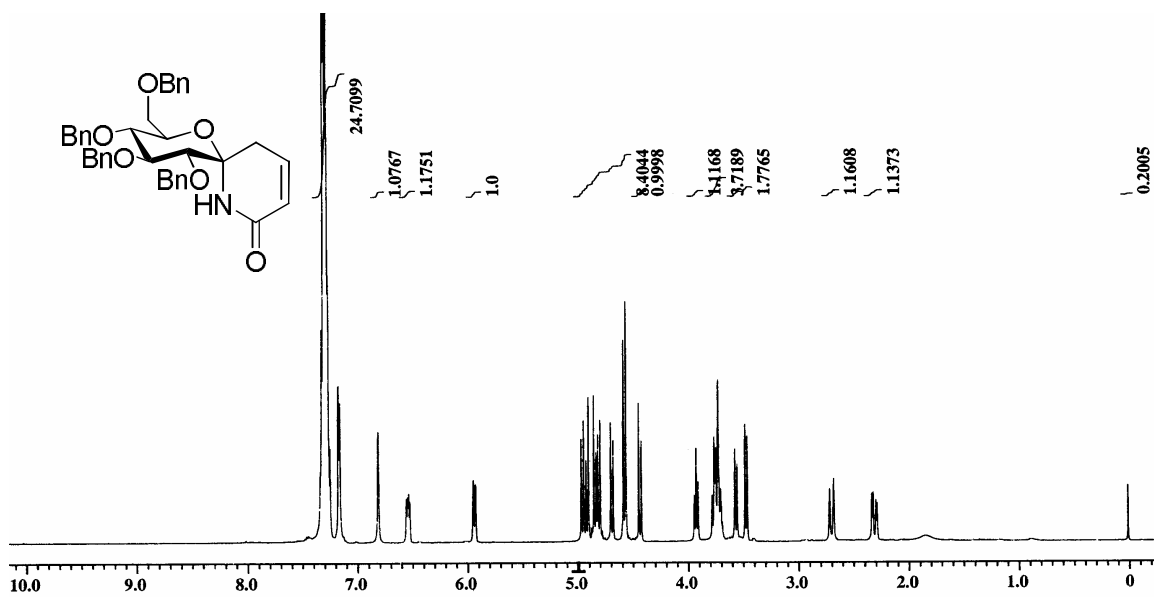

**Figure 49:** <sup>1</sup>H NMR (500 MHz) spectrum of compound 33a

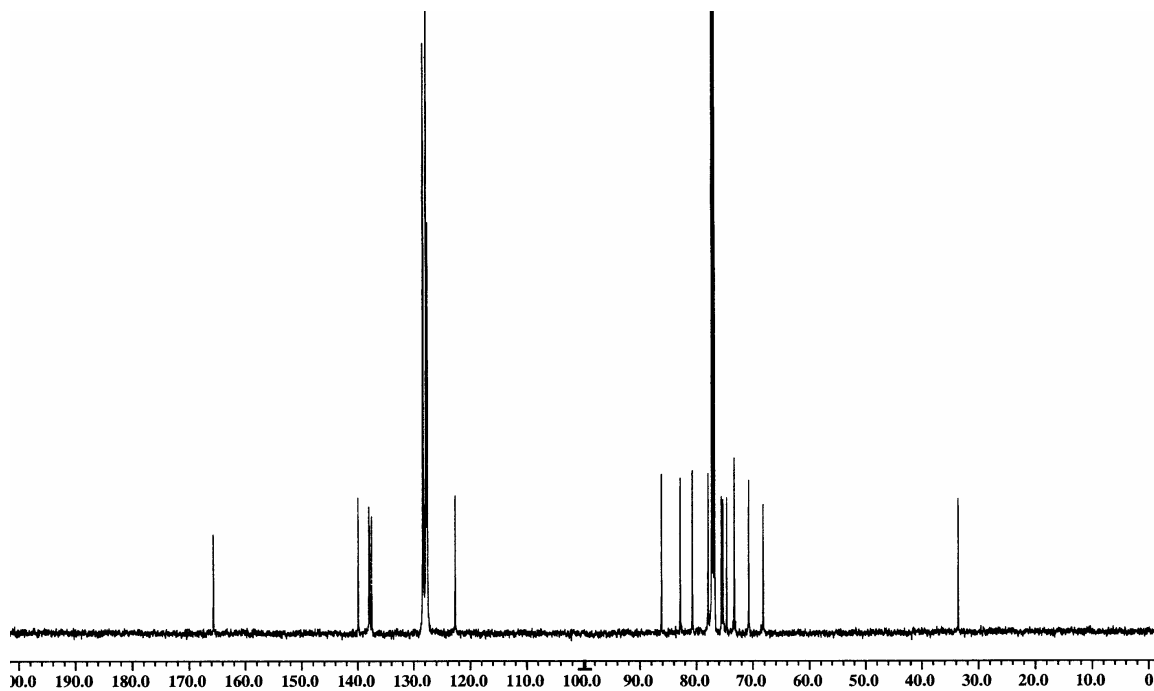

**Figure 50:** <sup>13</sup>C NMR (500 MHz) spectrum of compound 33a

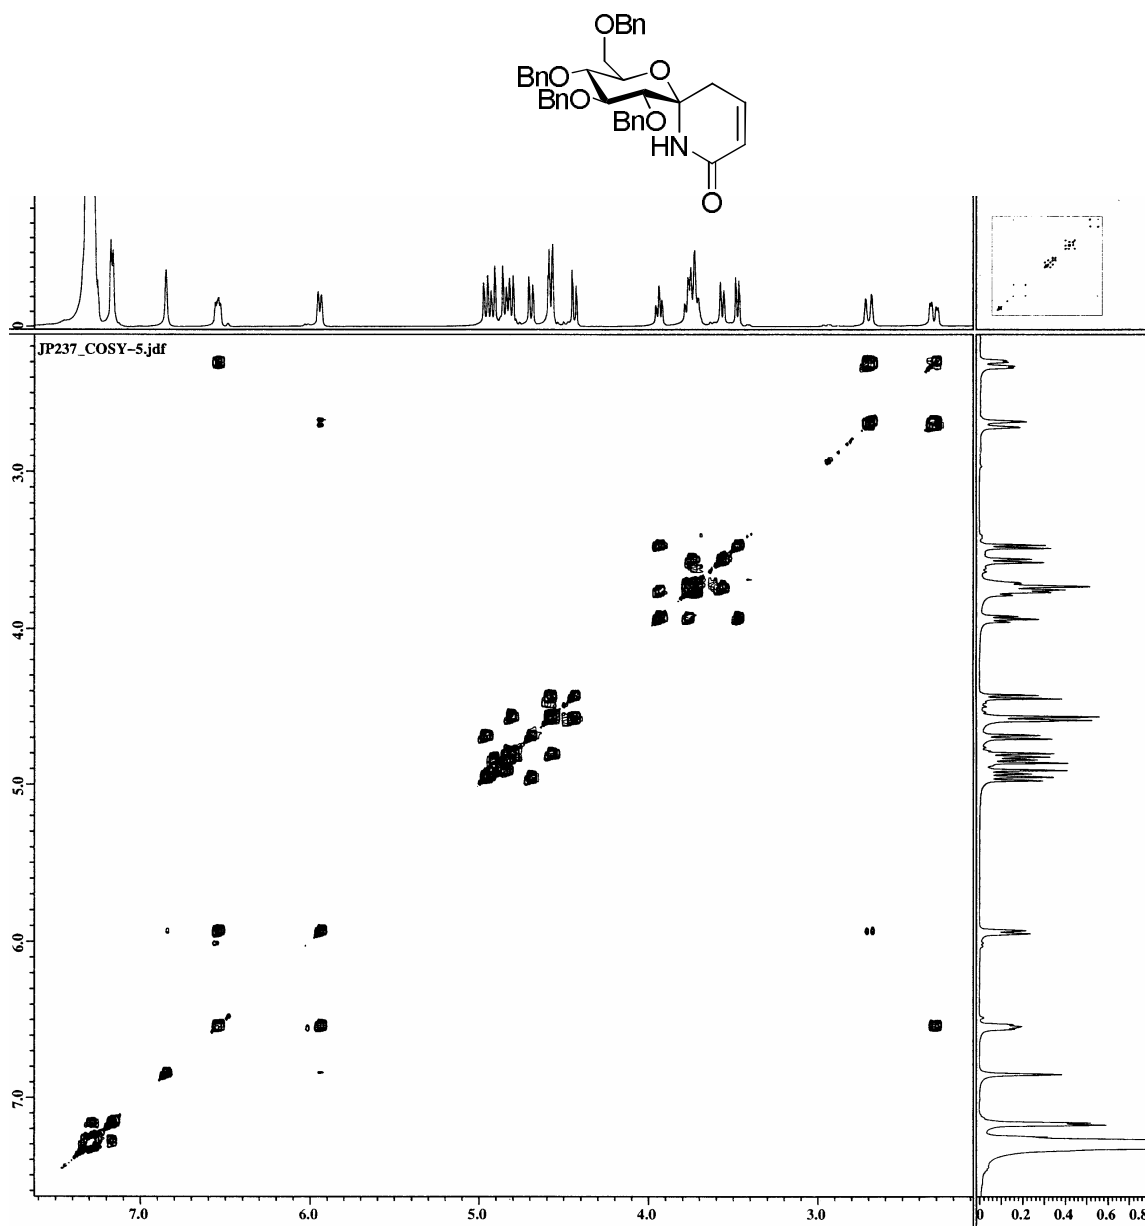

**Figure 51:**  $^1\text{H}$ - $^1\text{H}$  COSY (500 MHz) spectrum of compound **33a**

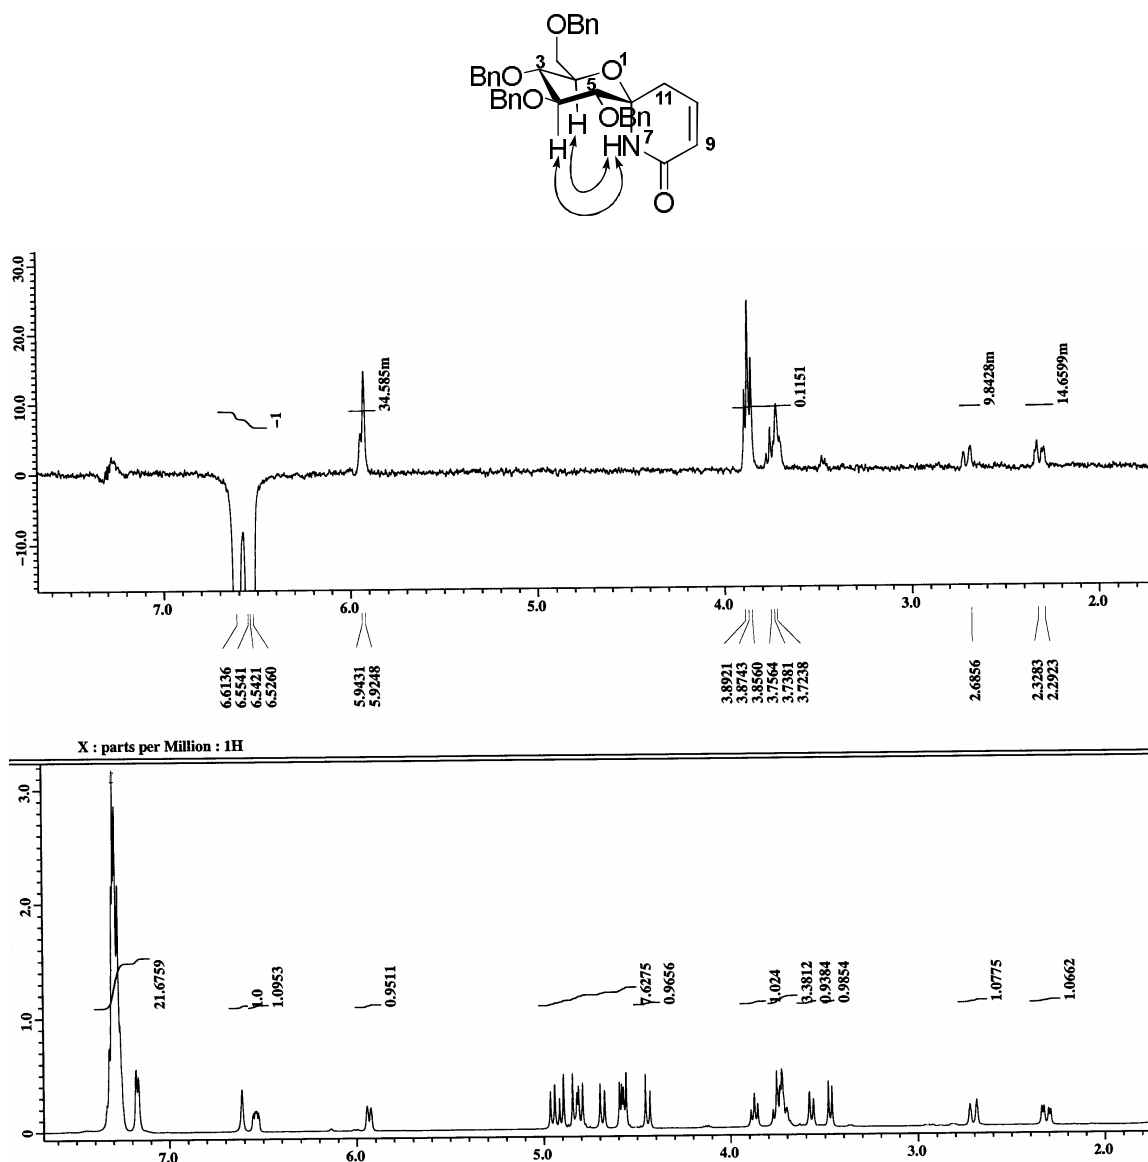

**Figure 52:** nOe (irradiation of -NH) spectrum of compound 33a

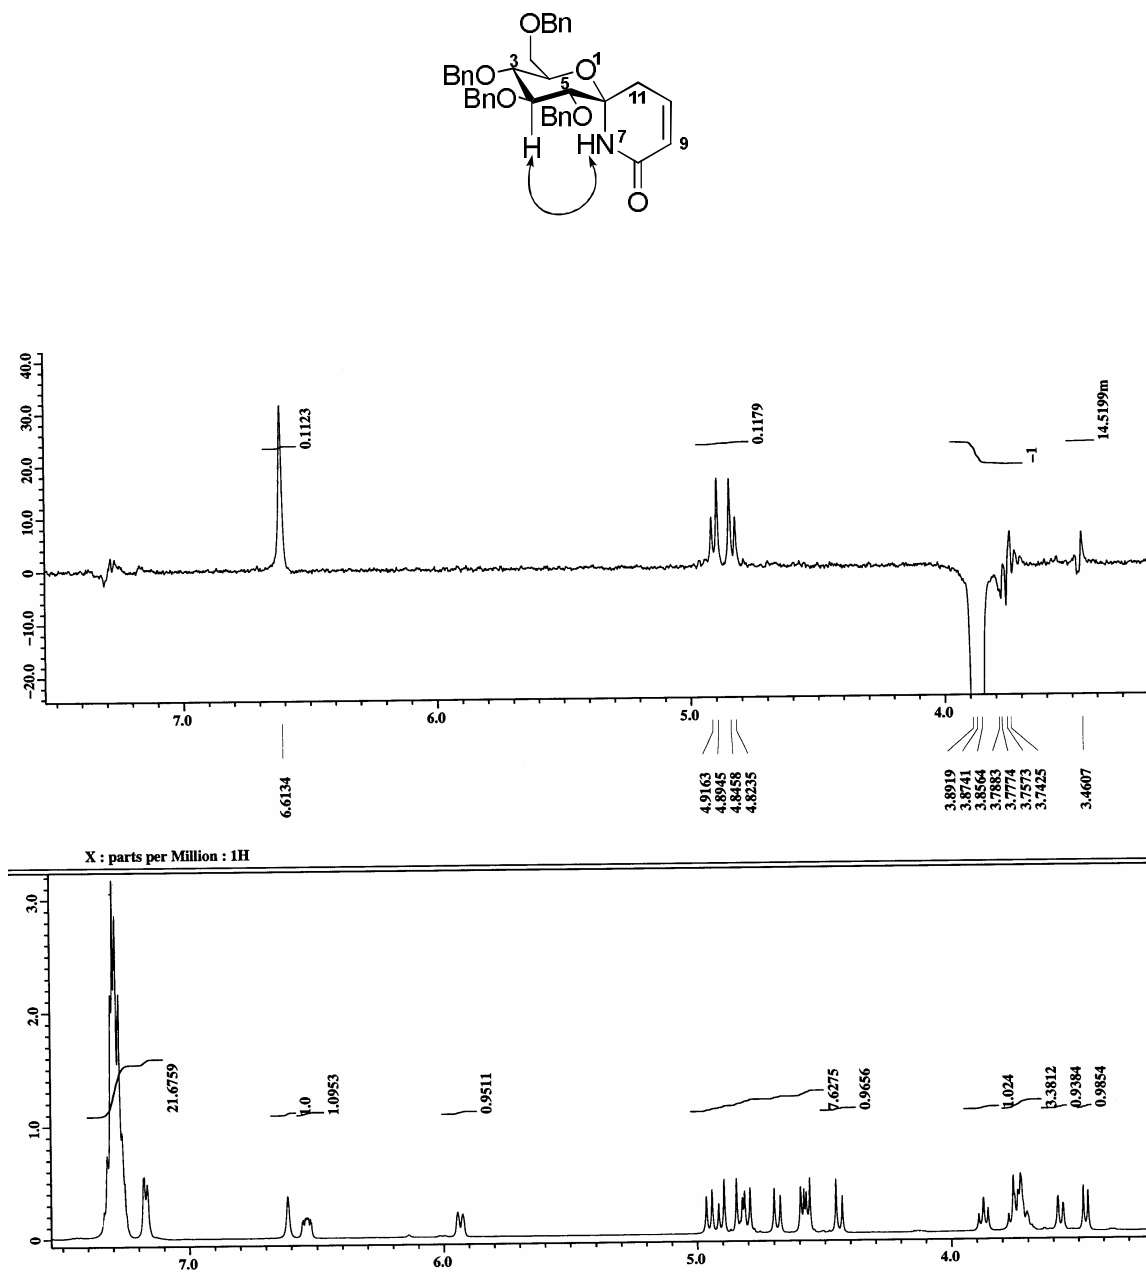

**Figure 53:** nOe (irradiation of H-4) spectrum of compound 33a

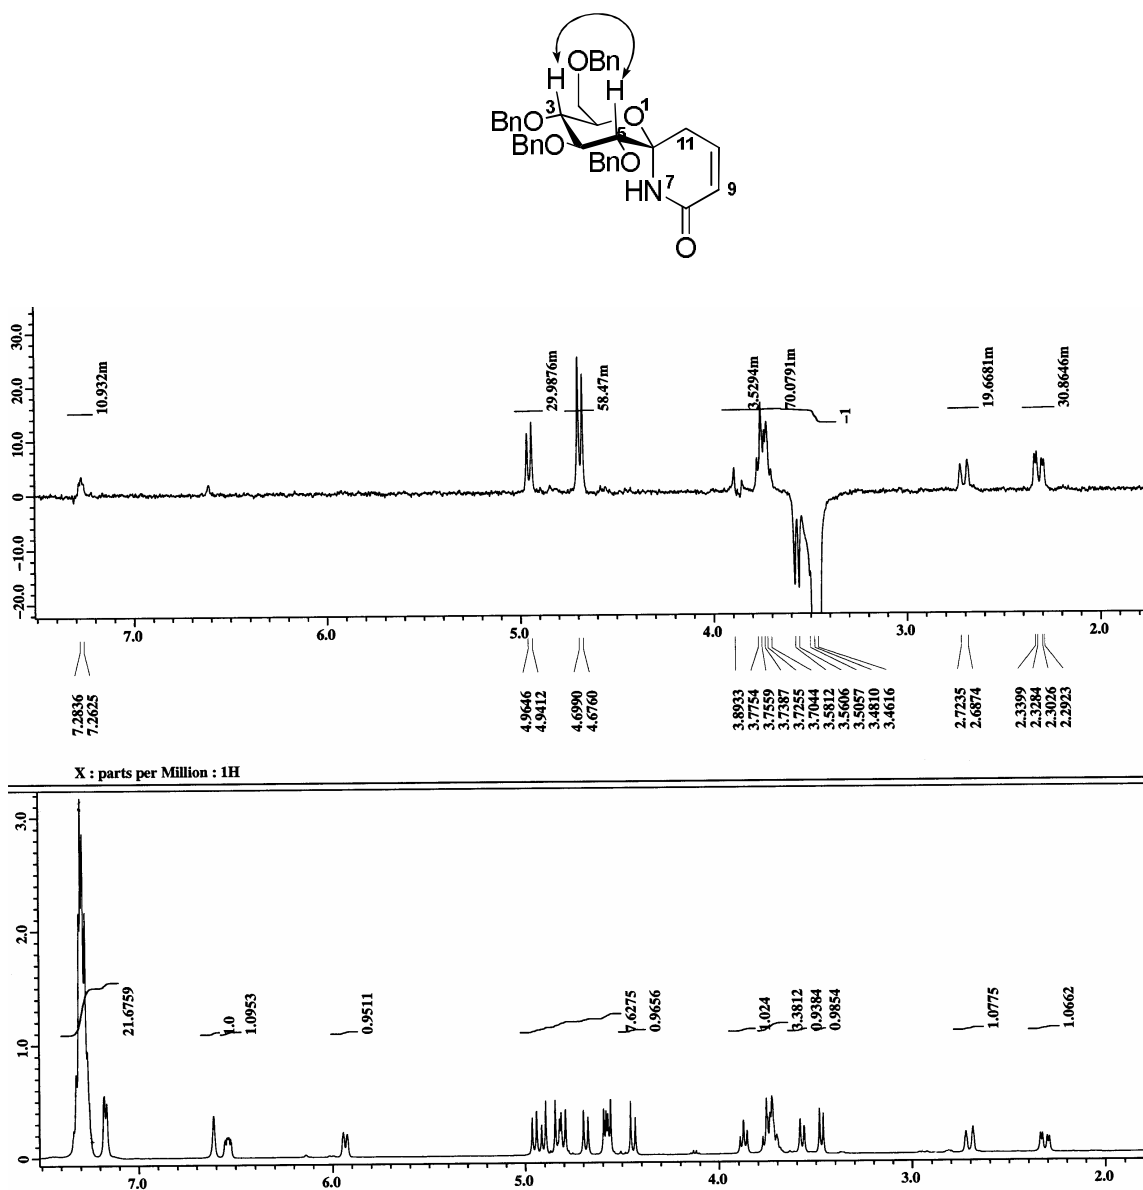

**Figure 54:** nOe (irradiation of H-5) spectrum of compound 33a

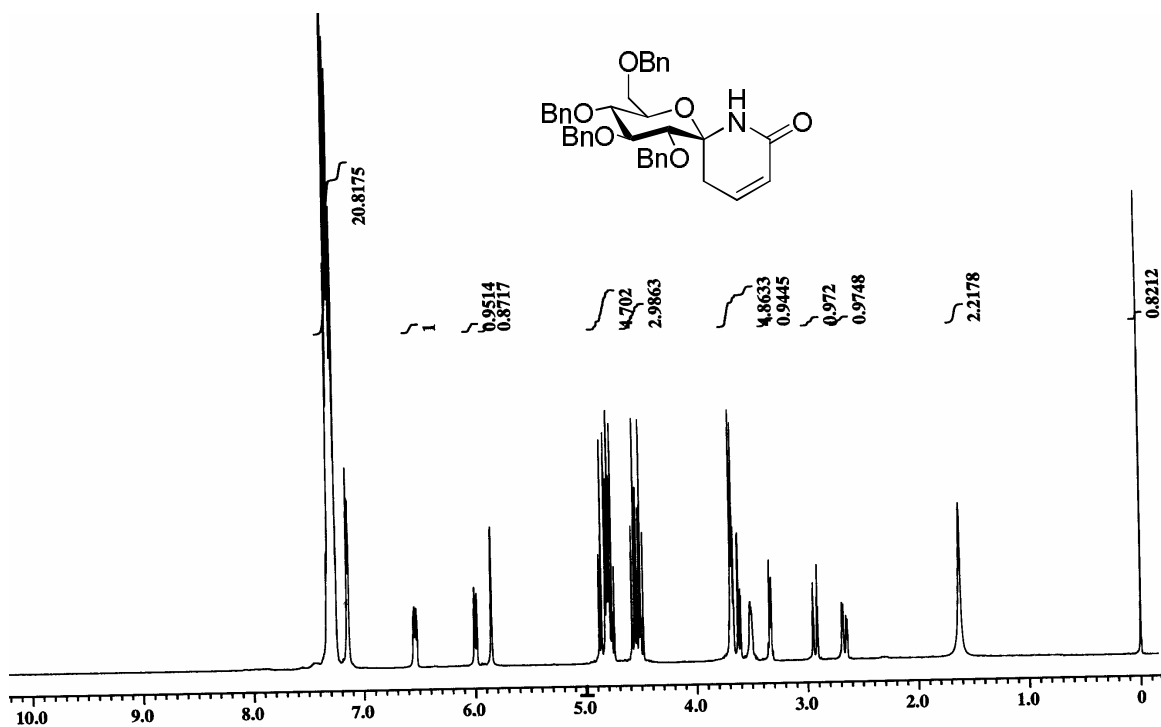

**Figure 55:**  $^1\text{H}$  NMR (500 MHz) spectrum of compound **33b**

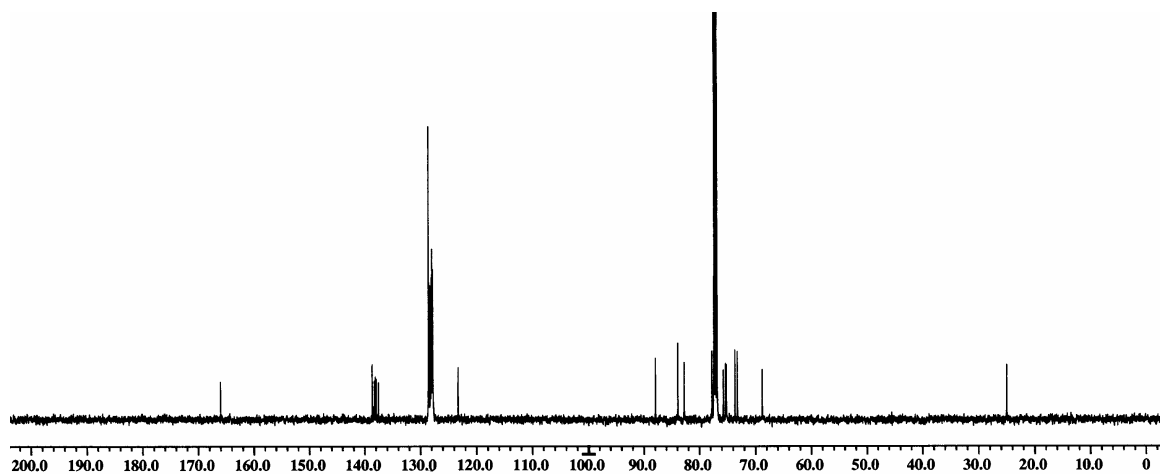

**Figure 56:**  $^{13}\text{C}$  NMR (500 MHz) spectrum of compound **33b**



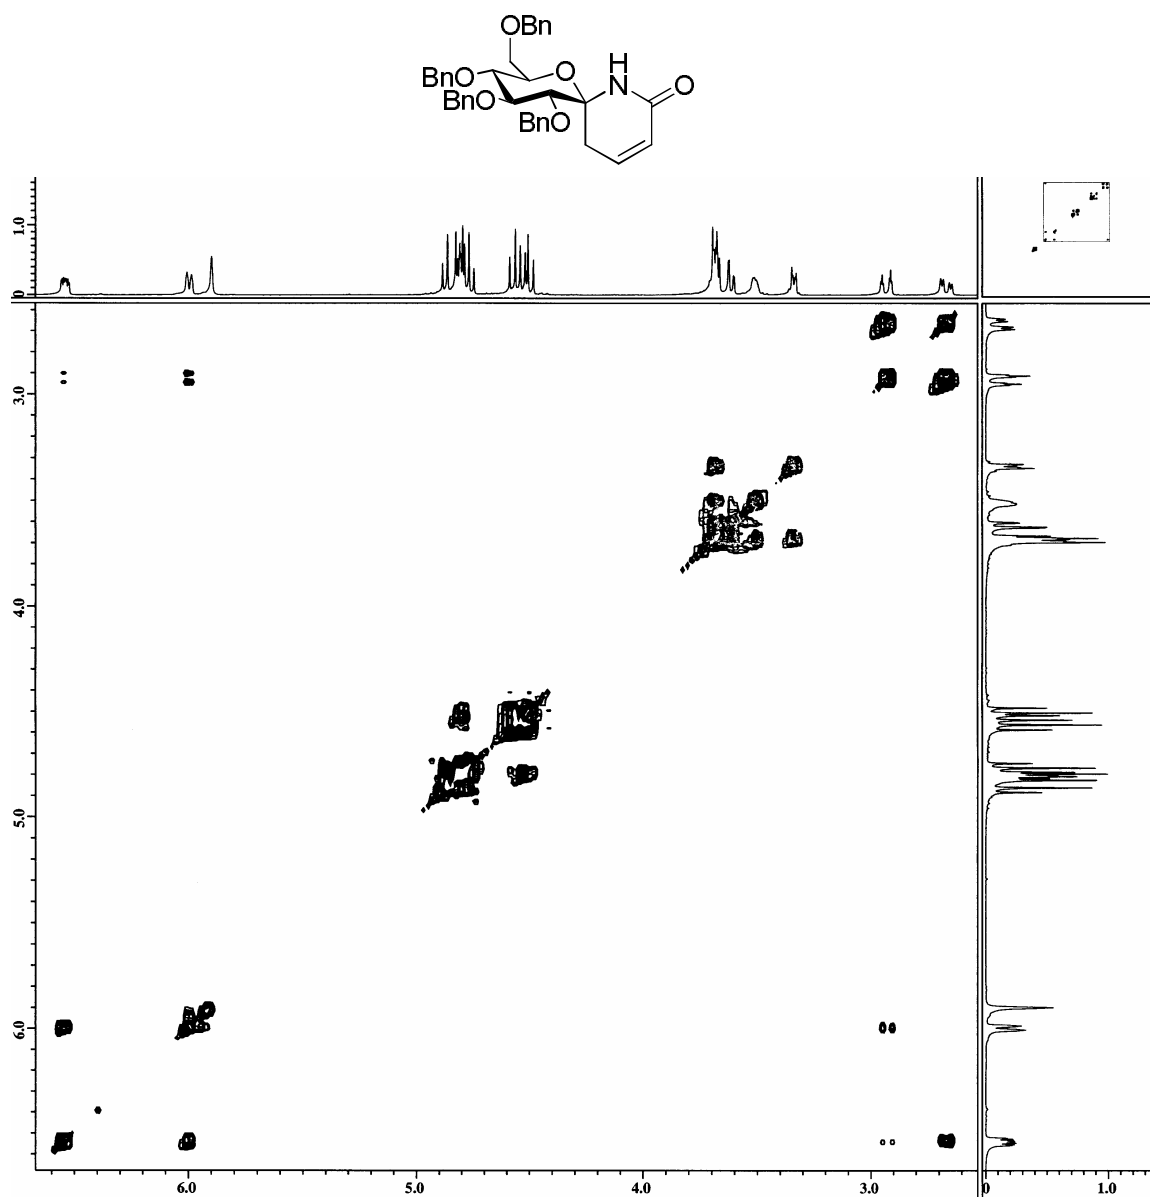

**Figure 57:**  $^1\text{H}$ - $^1\text{H}$  COSY (500 MHz) spectrum of compound **33b**

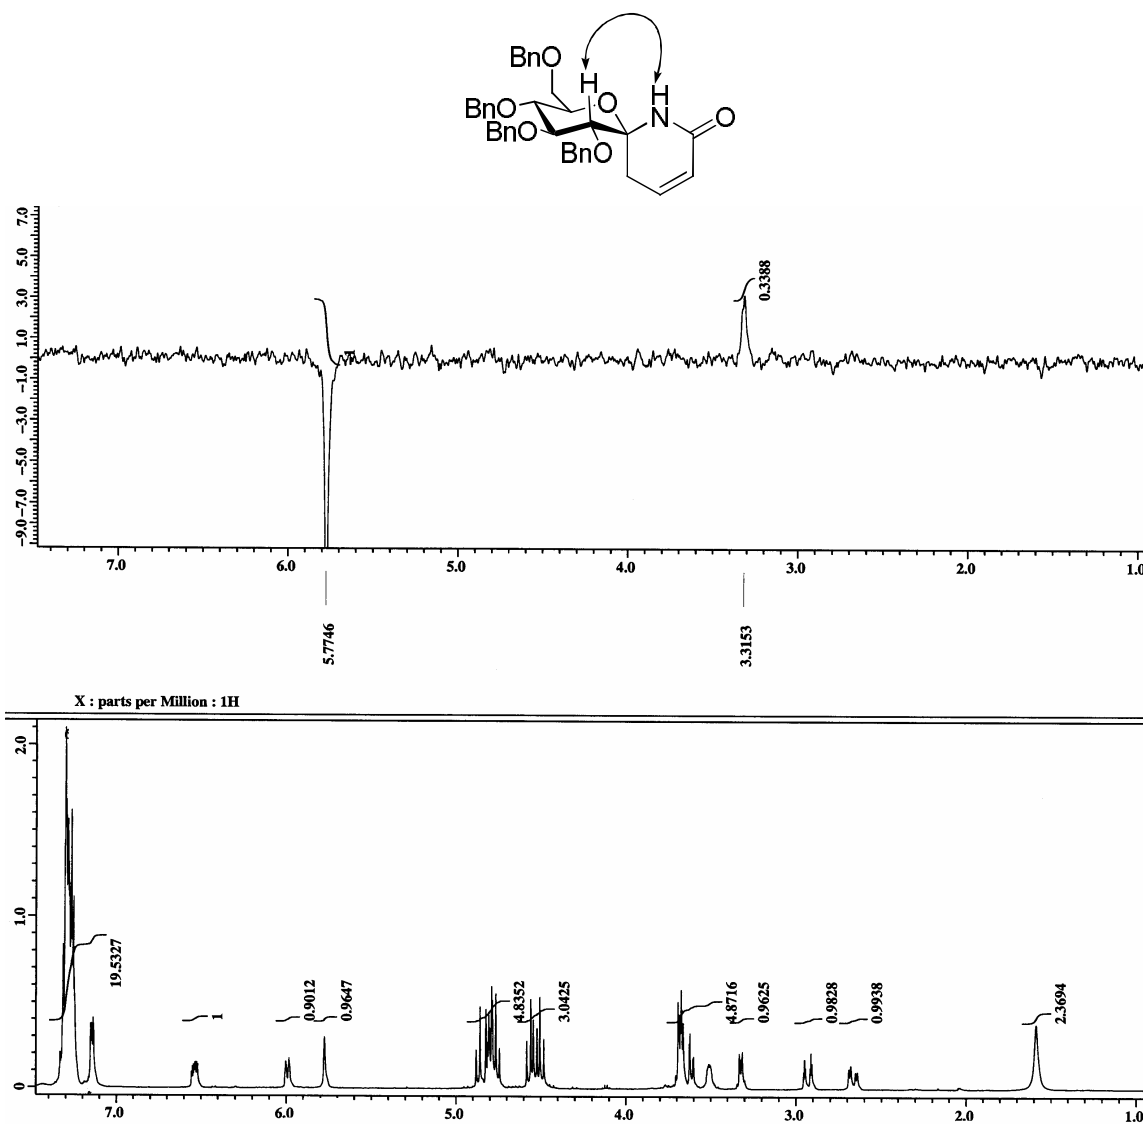

**Figure 58:** nOe (irradiation of -NH) spectrum of compound **33b**

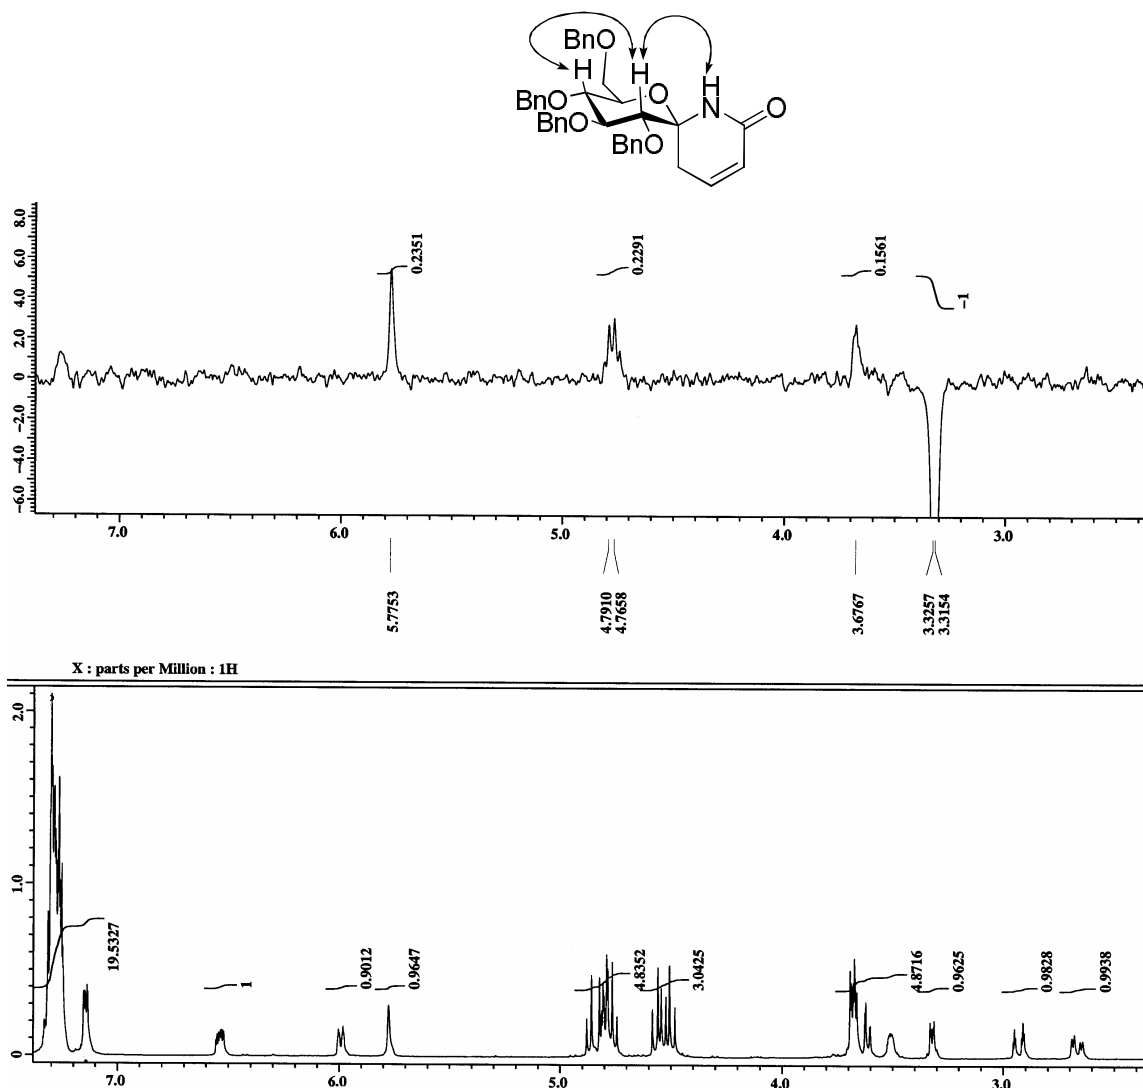

**Figure 59:** nOe (irradiation of H-5) spectrum of compound **33b**

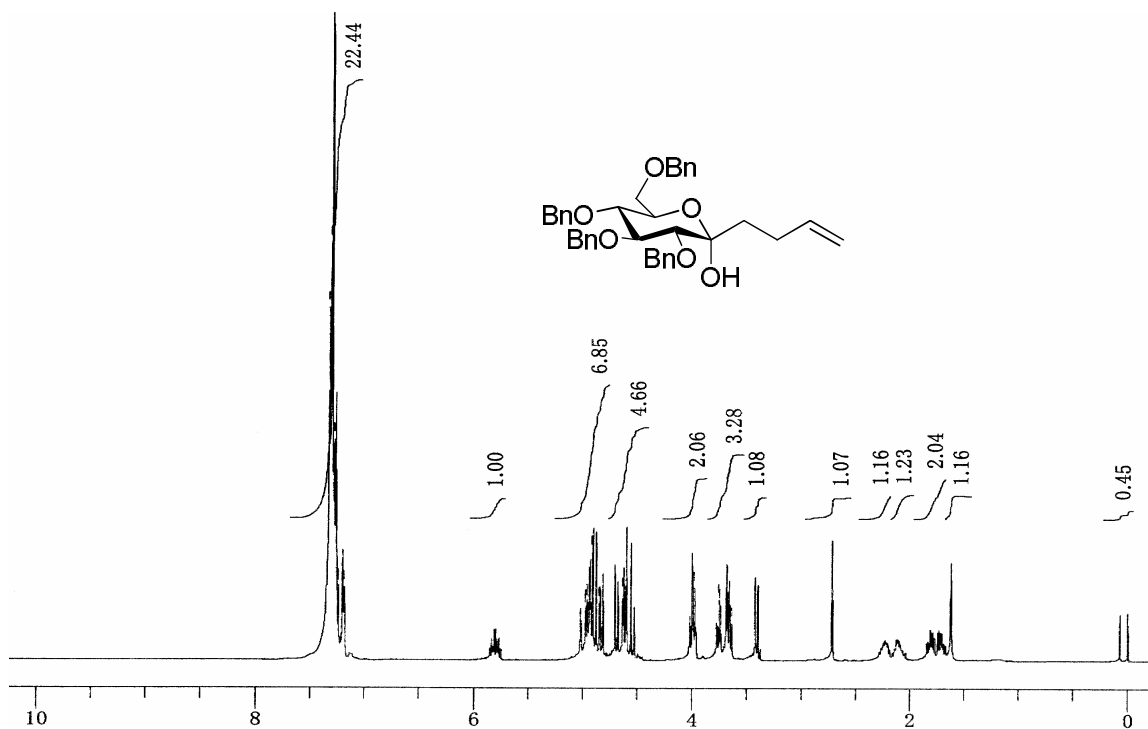

**Figure 60:**  $^1\text{H}$  NMR (400 MHz) spectrum of compound **34**

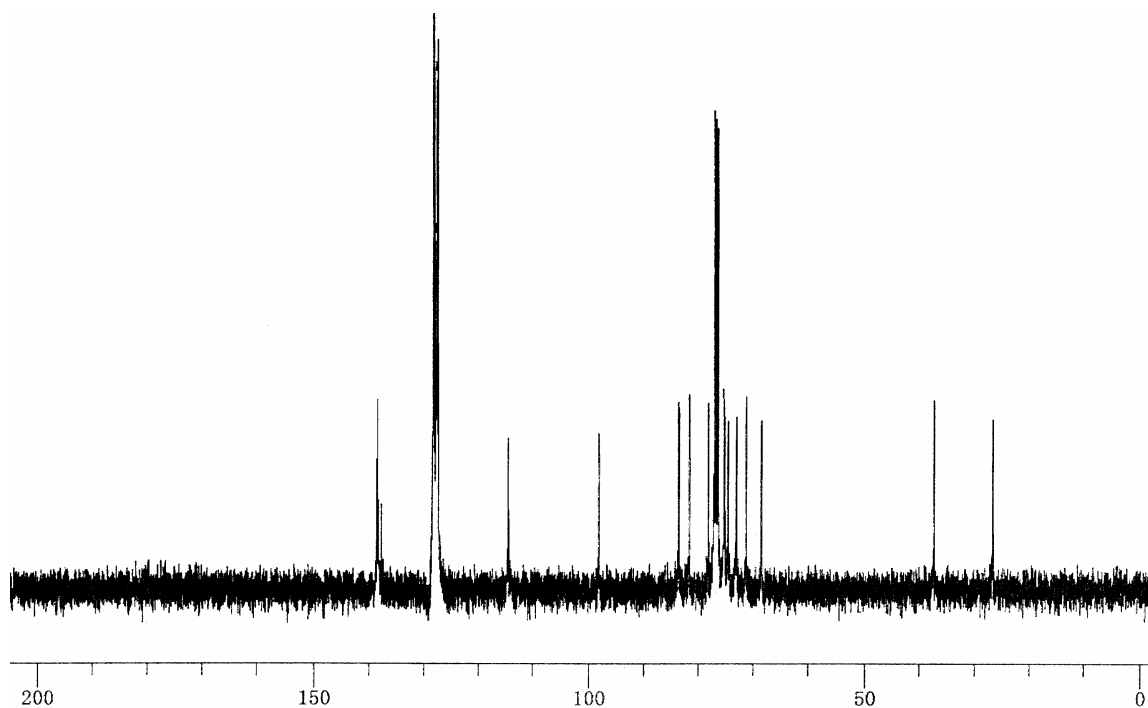

**Figure 61:**  $^{13}\text{C}$  NMR (100 MHz) spectrum of compound **34**

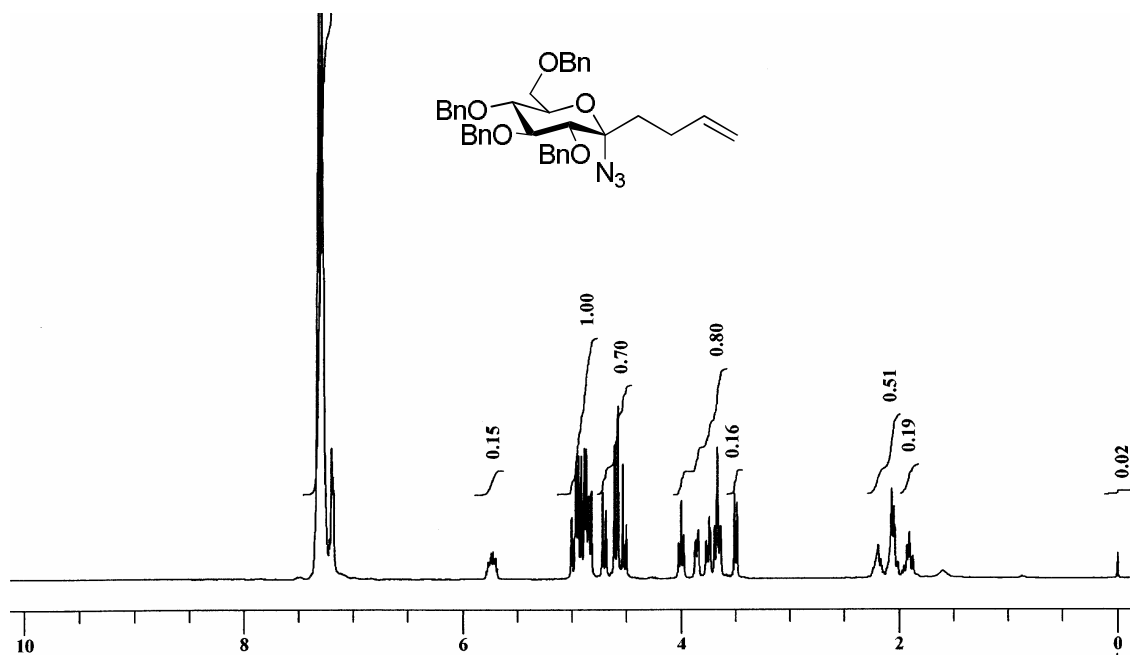

**Figure 62:**  $^1\text{H}$  NMR (400 MHz) spectrum of compound 35

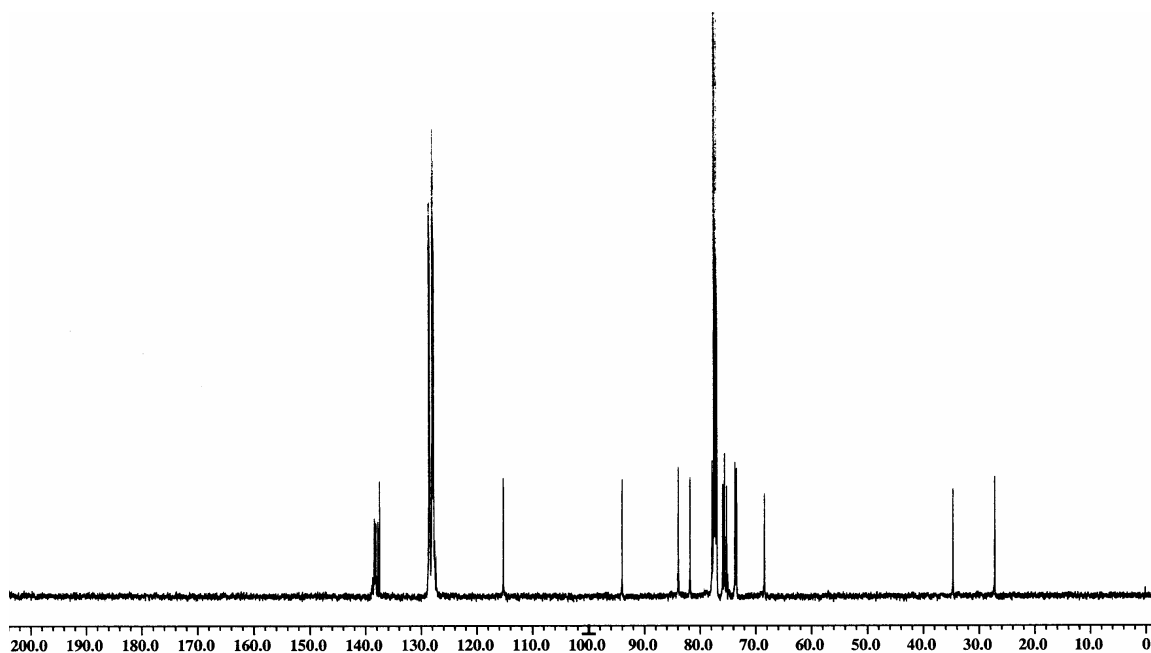

**Figure 63:**  $^{13}\text{C}$  NMR (100 MHz) spectrum of compound 35

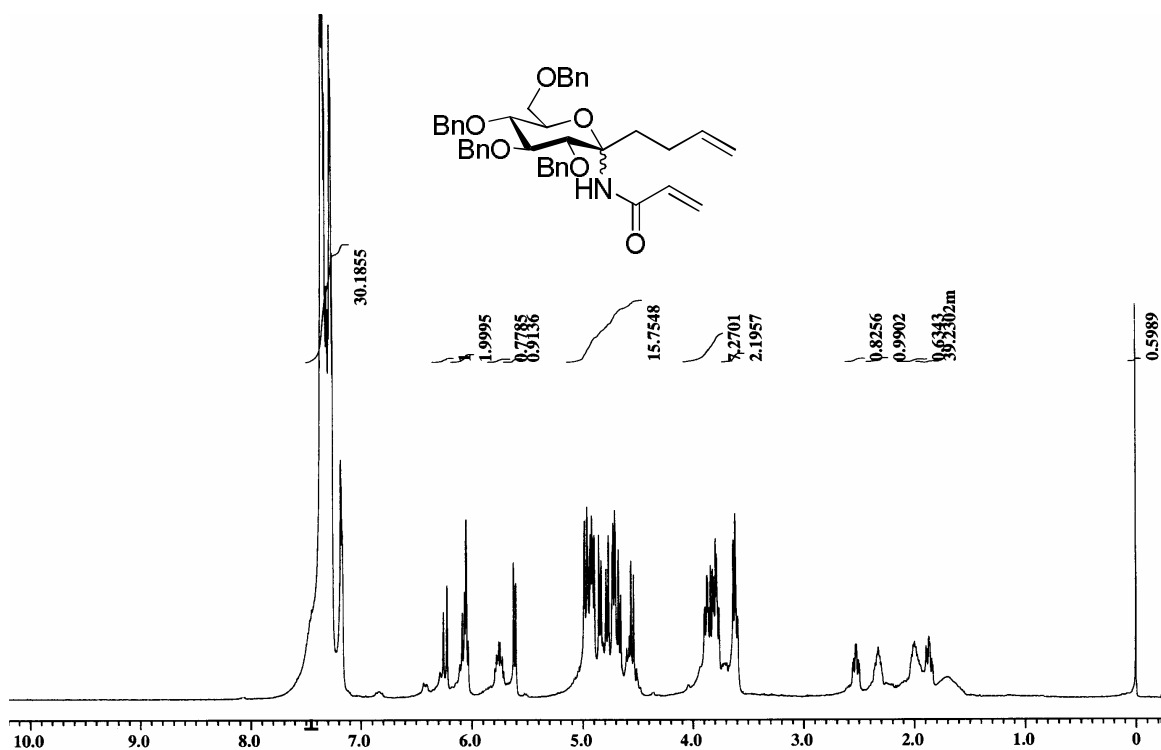

**Figure 64:**  $^1\text{H}$  NMR (500 MHz) spectrum of compound 36

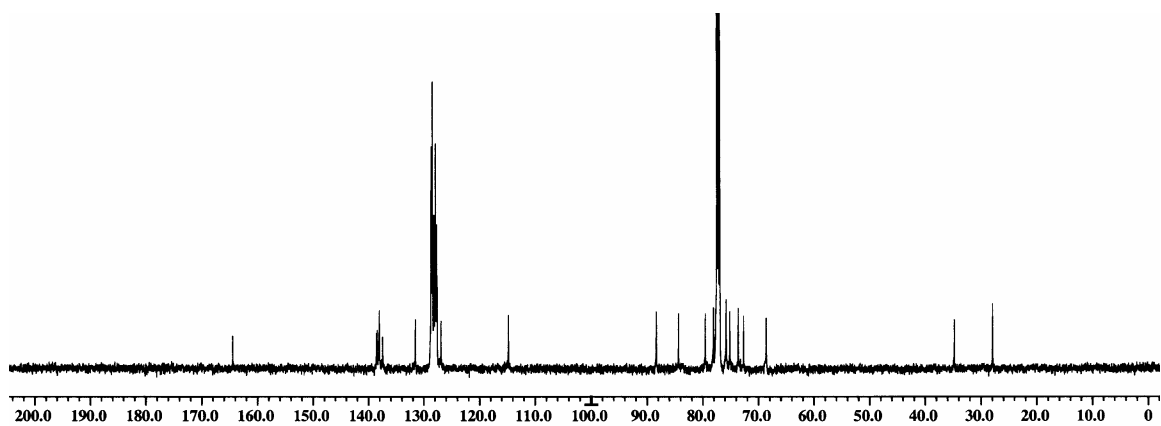

**Figure 65:**  $^{13}\text{C}$  NMR (500 MHz) spectrum of compound 36

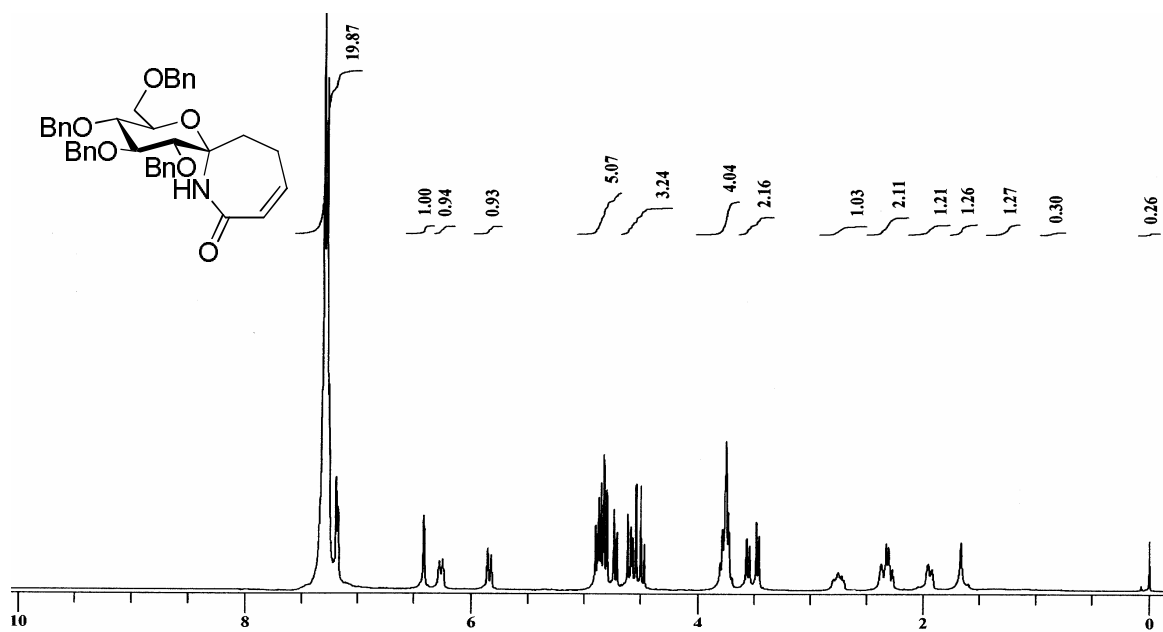

**Figure 66:**  $^1\text{H}$  NMR (400 MHz) spectrum of compound **37a**

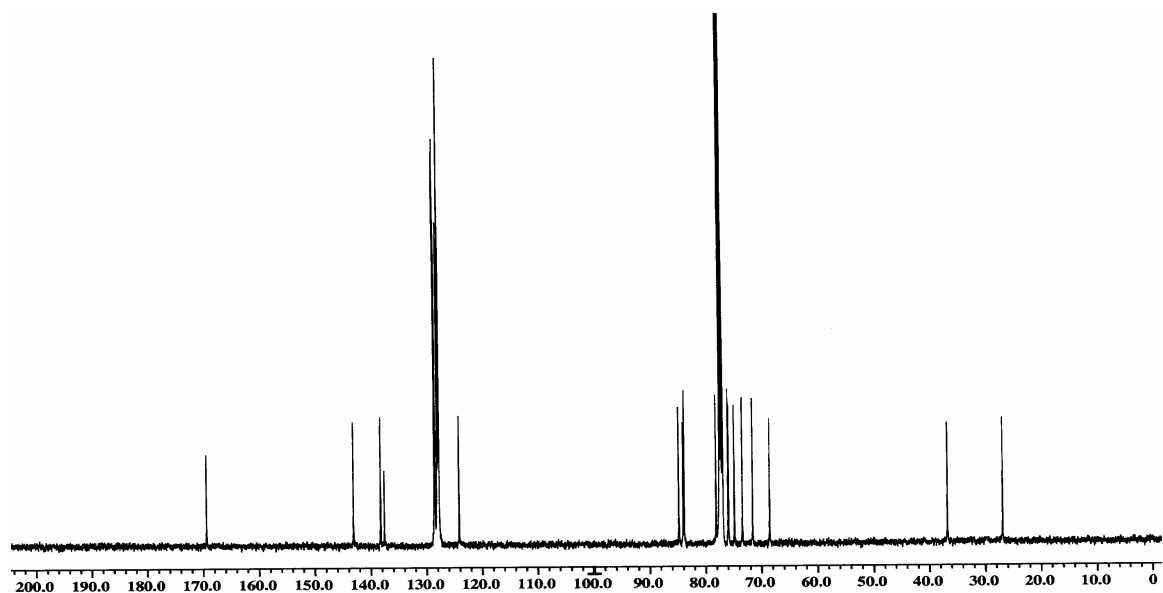

**Figure 67:**  $^{13}\text{C}$  NMR (500 MHz) spectrum of compound **37a**

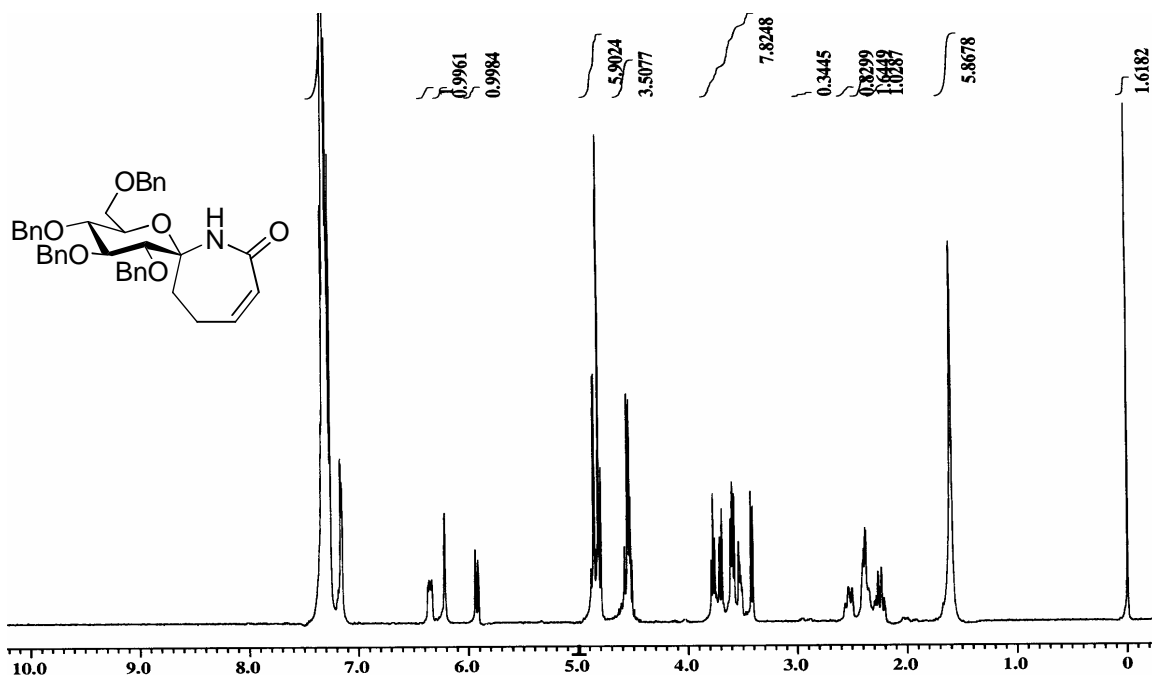

**Figure 68:**  $^1\text{H}$  NMR (400 MHz) spectrum of compound **37b**

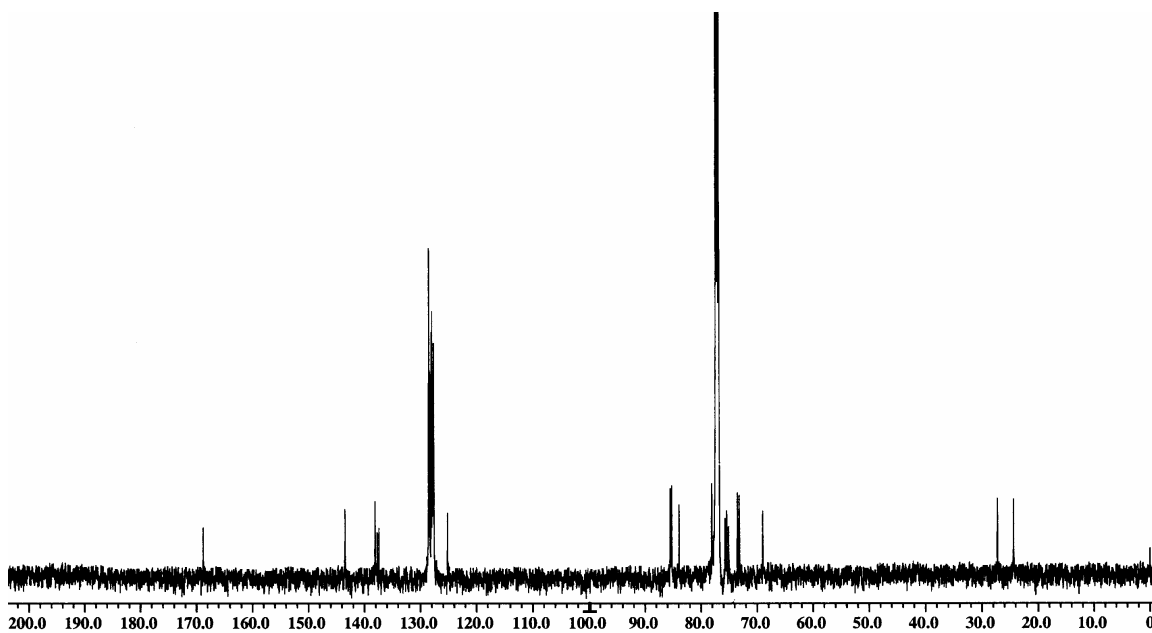

**Figure 69:**  $^{13}\text{C}$  NMR (500 MHz) spectrum of compound **37b**



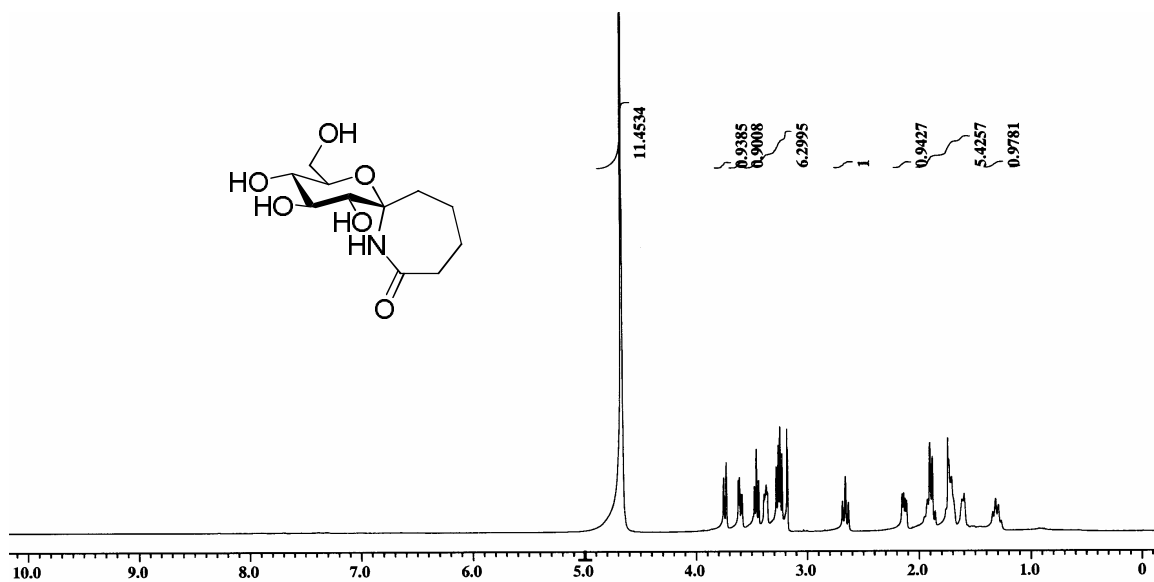

**Figure 70:** <sup>1</sup>H NMR (500 MHz) spectrum of compound 38a

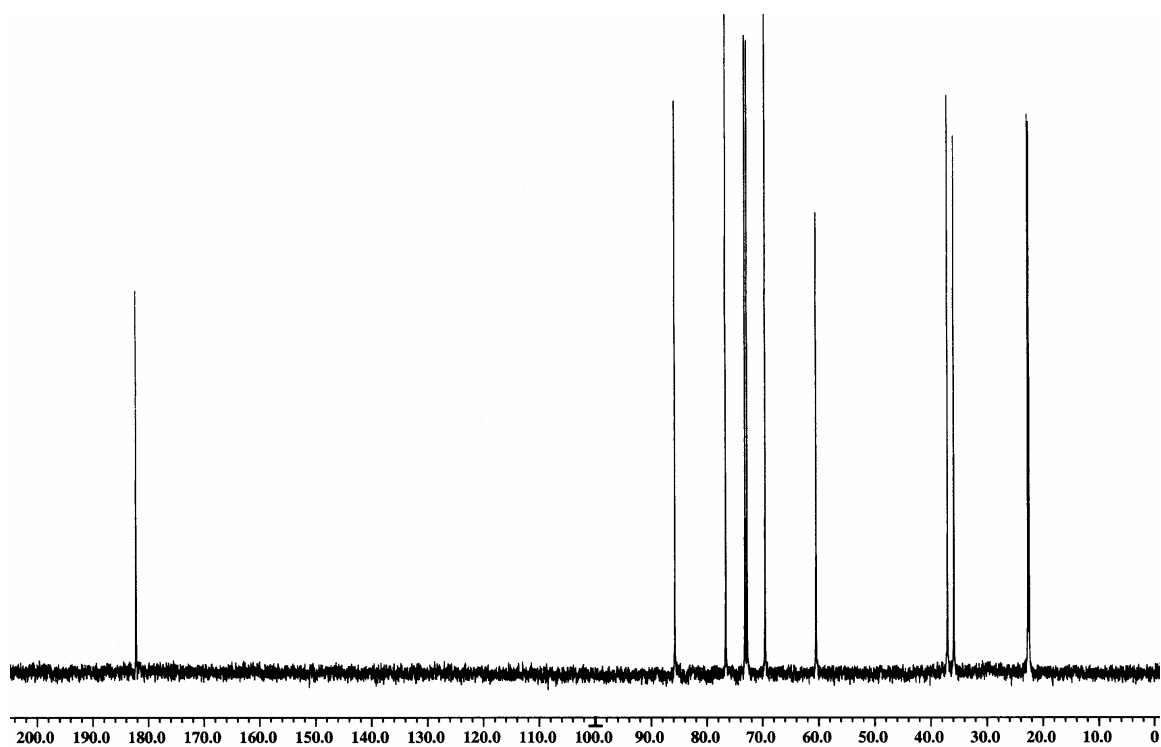

**Figure 71:** <sup>13</sup>C NMR (500 MHz) spectrum of compound 38a

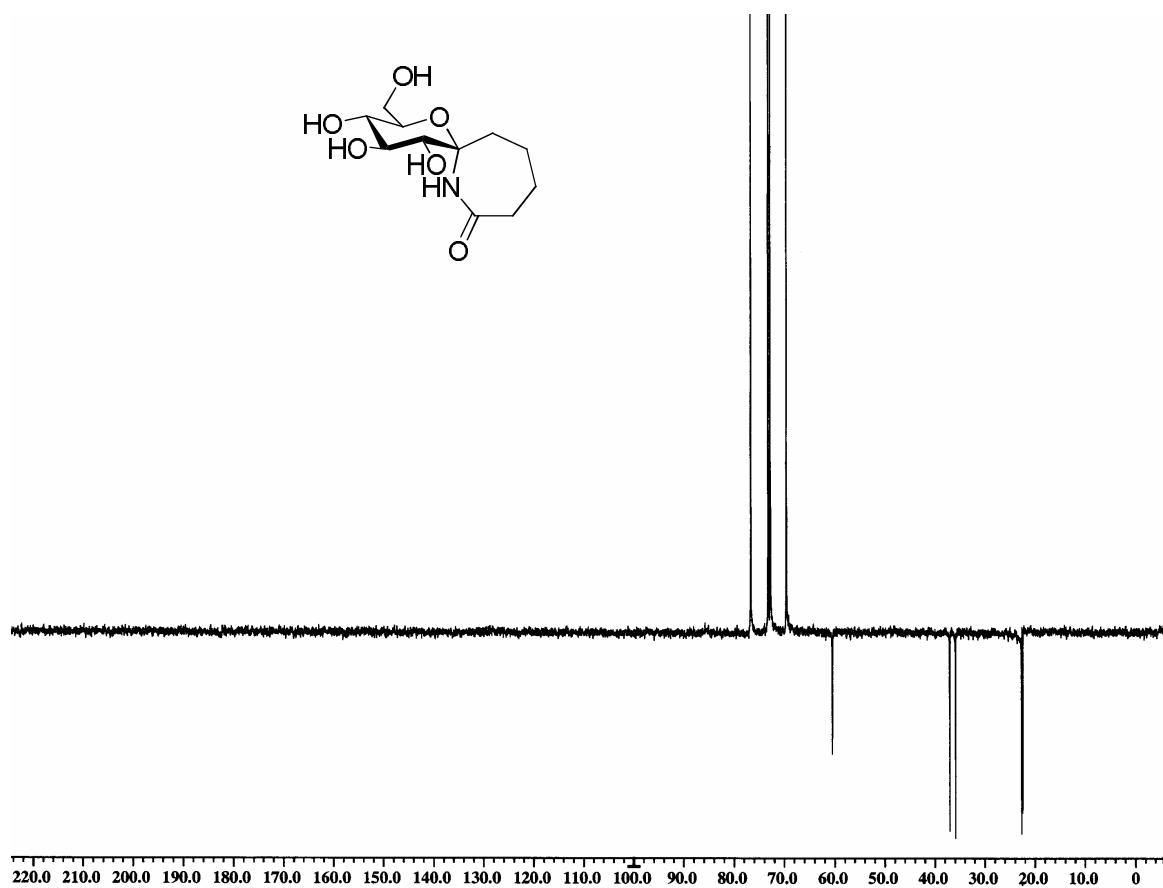

**Figure 72:** DEPT-135 (500 MHz) spectrum of compound **38a**

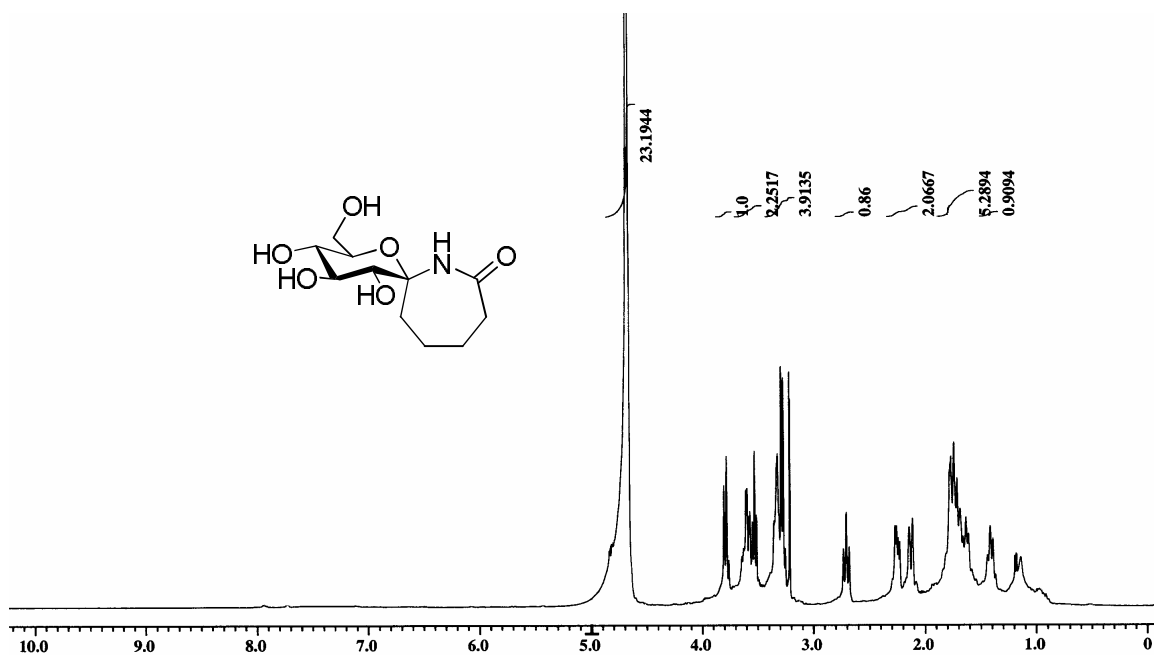

**Figure 73:**  $^1\text{H}$  NMR (500 MHz) spectrum of compound **38b**

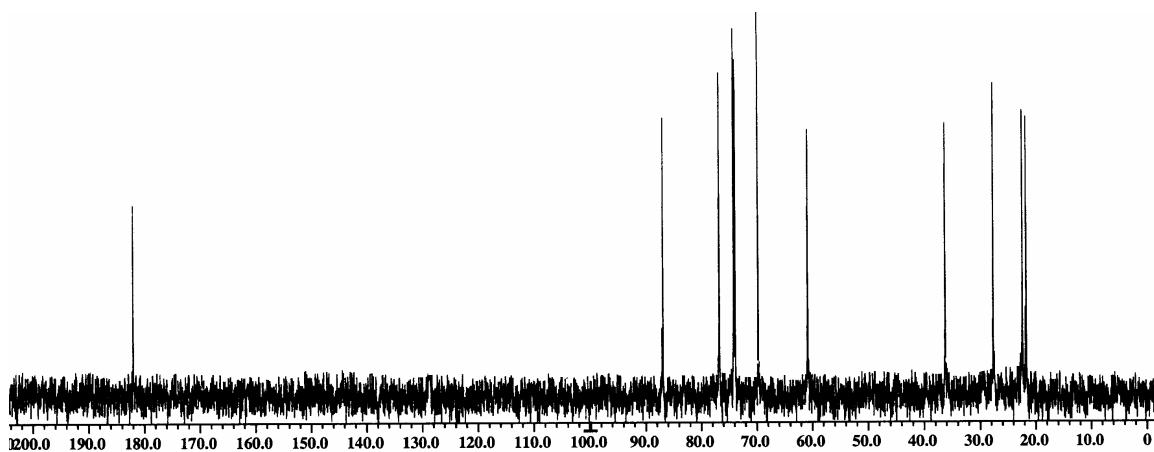

**Figure 74:**  $^{13}\text{C}$  NMR (500 MHz) spectrum of compound **38b**

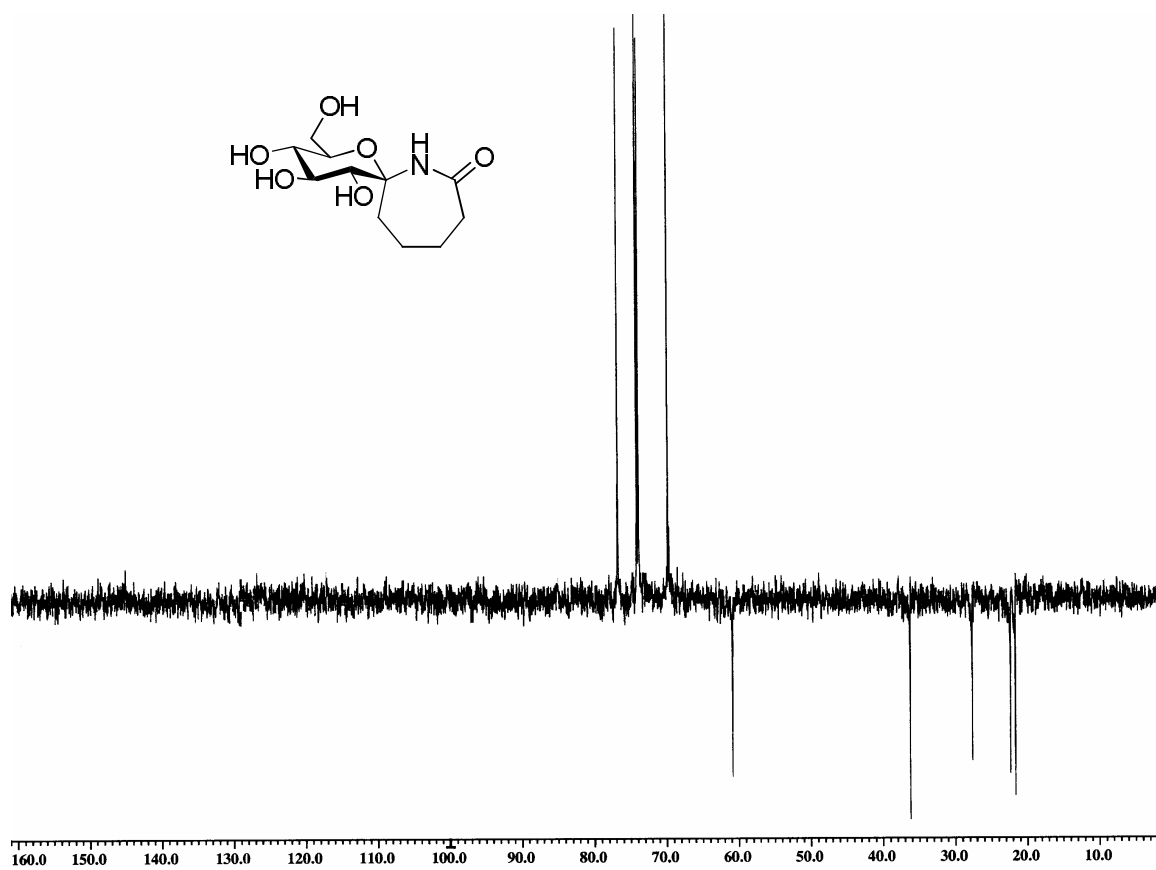

**Figure 75:** DEPT-135 (500 MHz) spectrum of compound **38b**

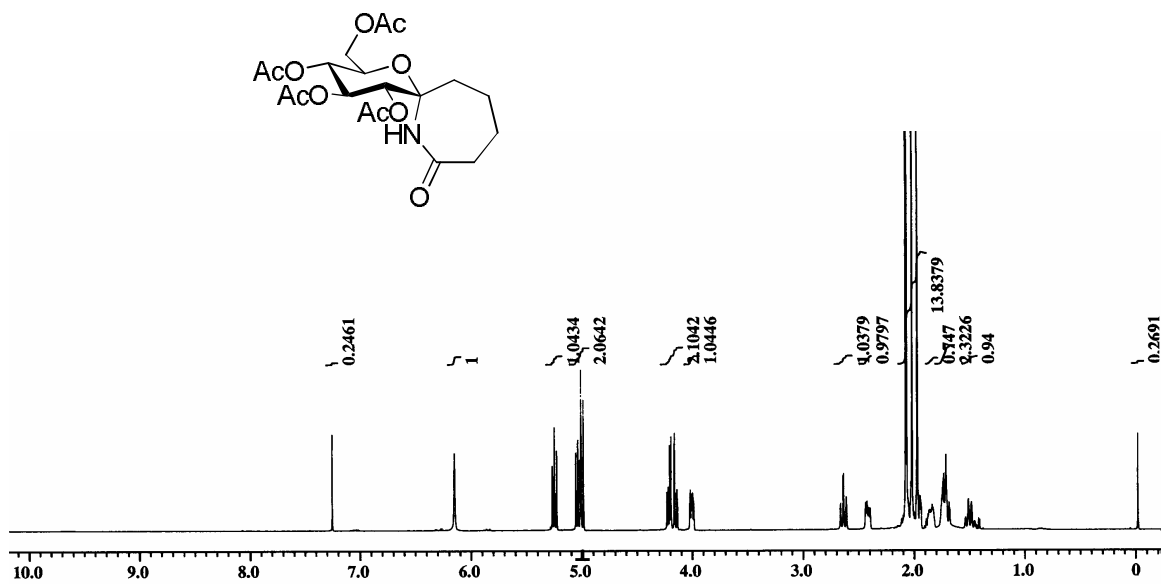

**Figure 76:** <sup>1</sup>H NMR (500 MHz) spectrum of compound 39a

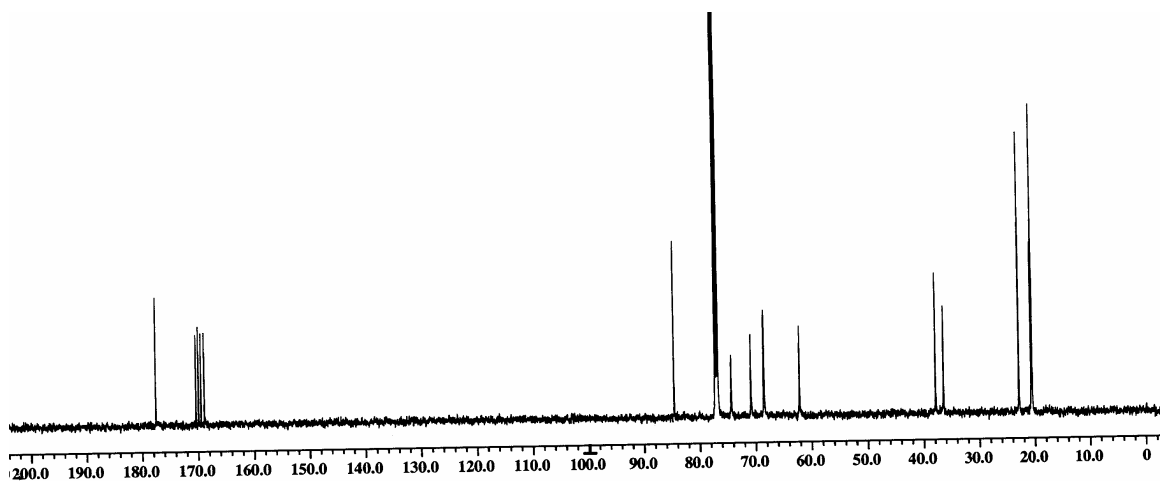

**Figure 77:** <sup>13</sup>C NMR (500 MHz) spectrum of compound 39a

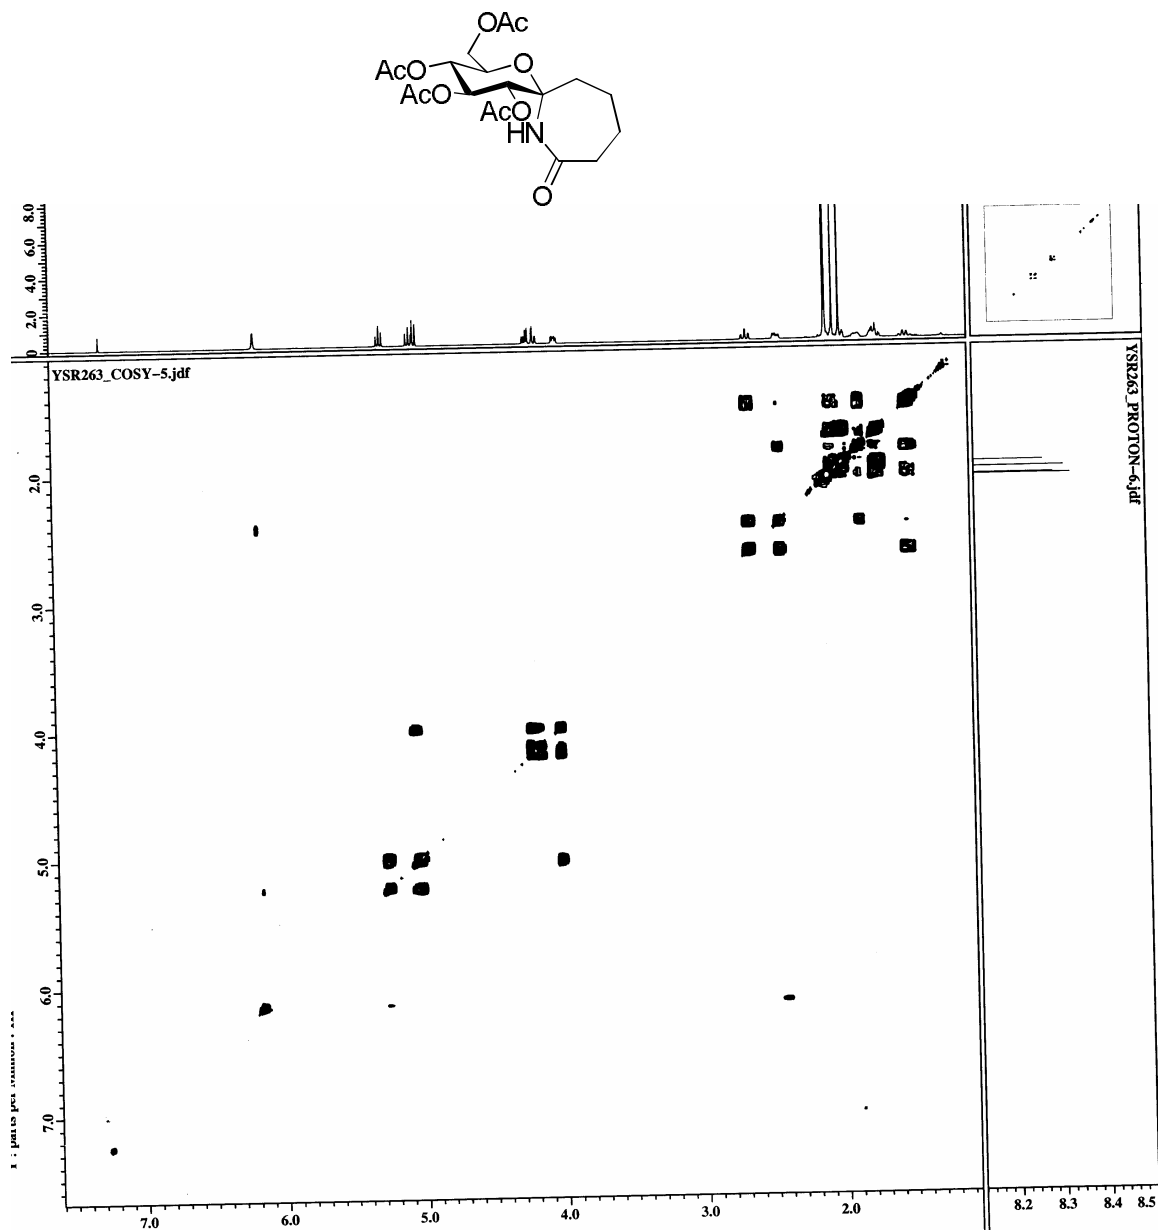

**Figure 78:** <sup>1</sup>H-<sup>1</sup>H COSY (500 MHz) spectrum of compound **39a**

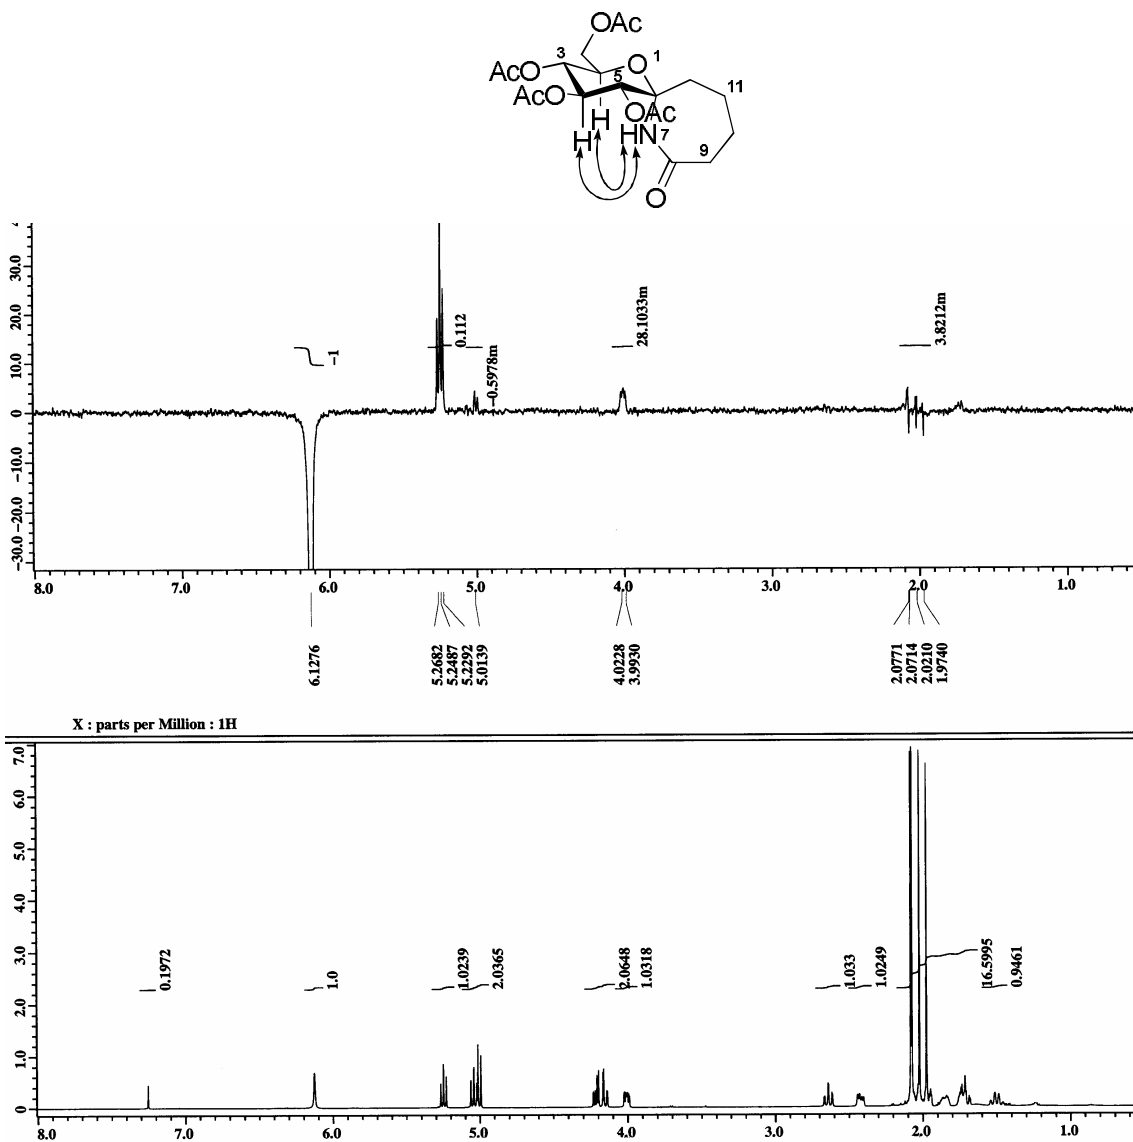

**Figure 79:** nOe (irradiation of -NH) spectrum of compound **39a**

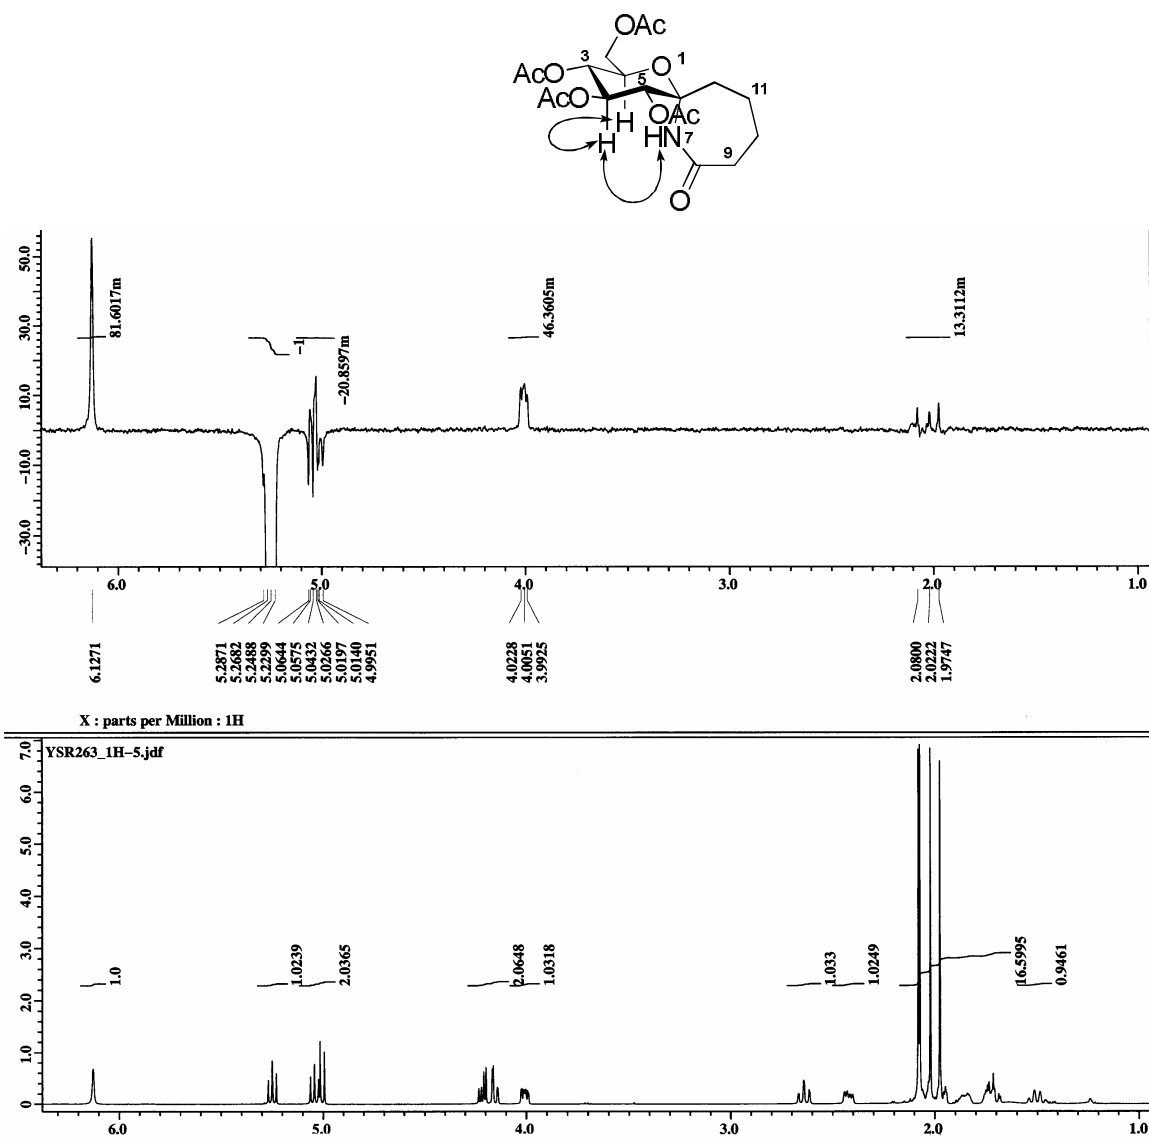

**Figure 80:** nOe (irradiation of H-4) spectrum of compound 39a



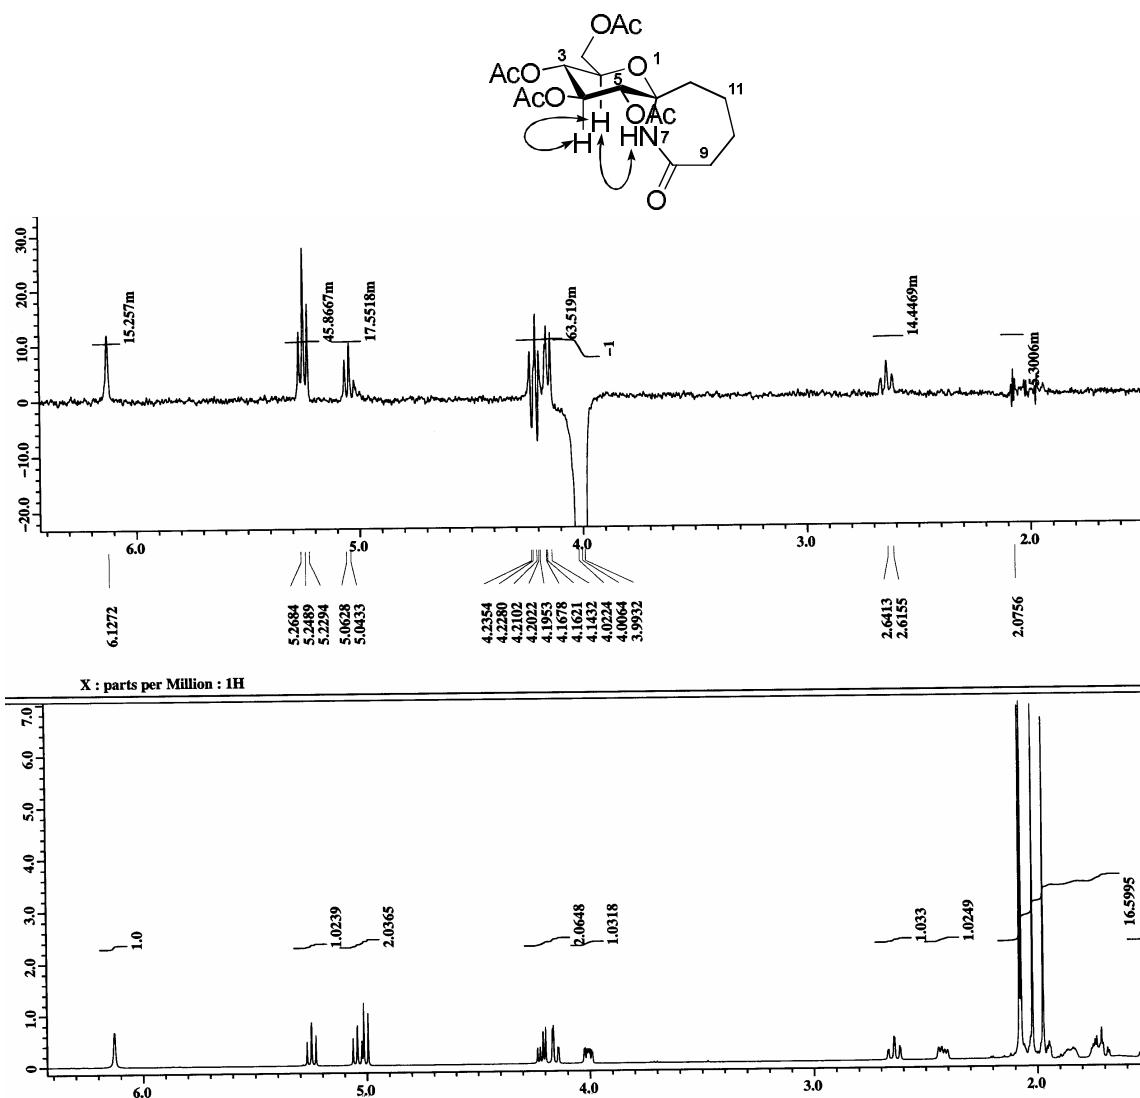

**Figure 81:** nOe (irradiation of H-2) spectrum of compound **39a**  
(Vicinal enhancements were not highlighted in the structure)

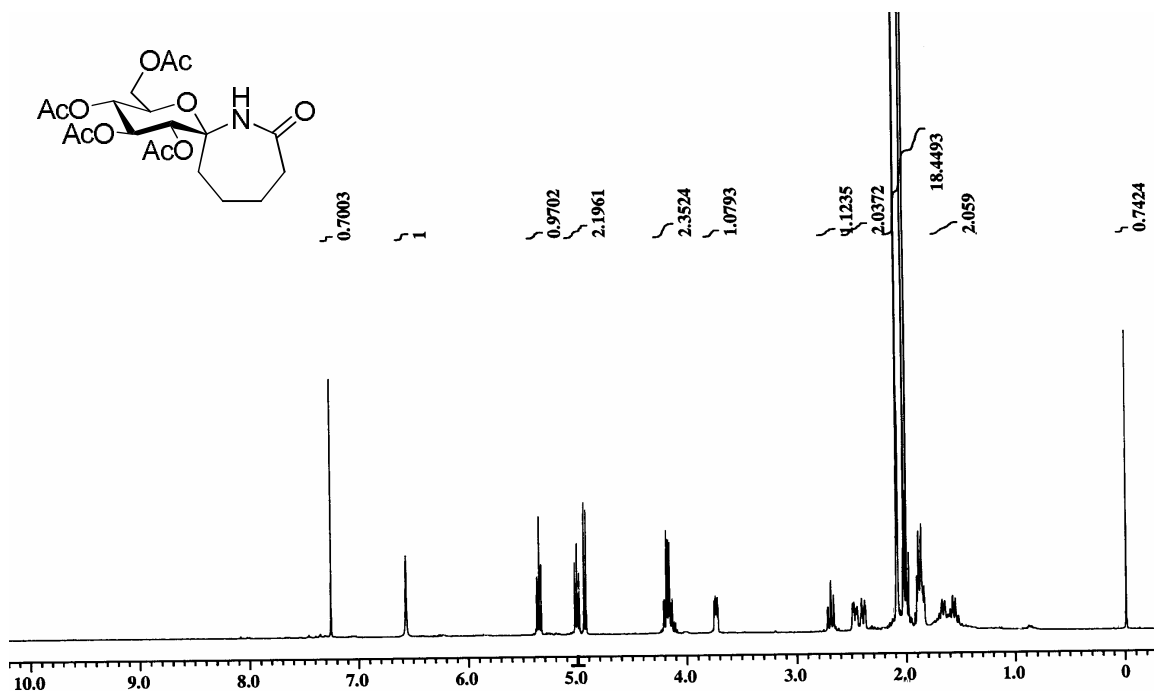

**Figure 82:**  $^1\text{H}$  NMR (500 MHz) spectrum of compound **39b**

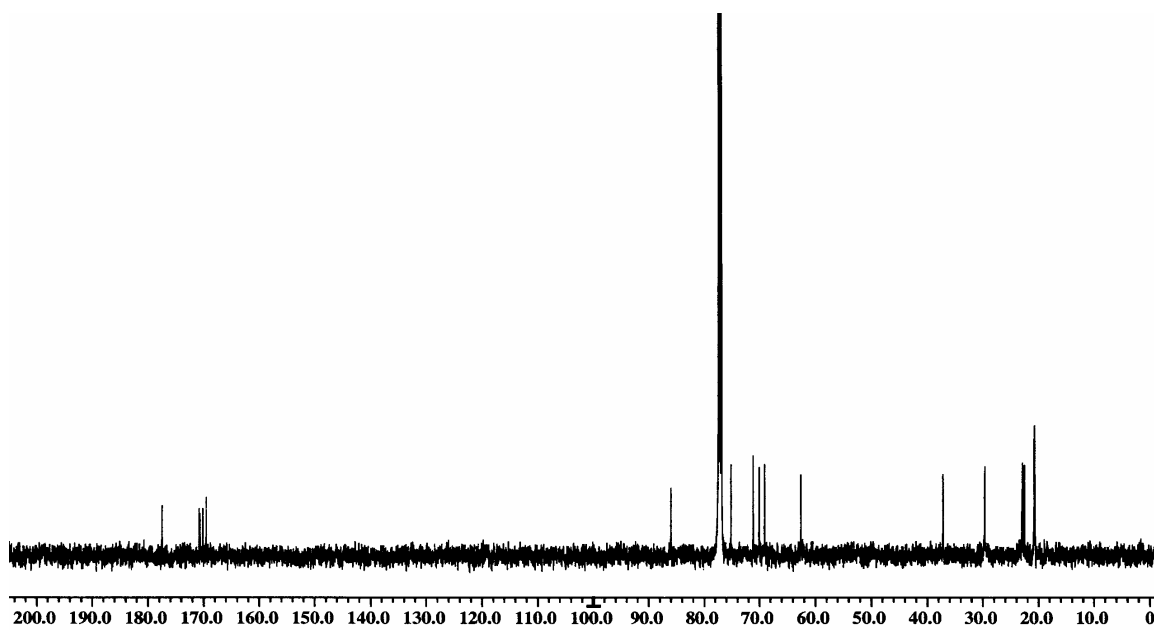

**Figure 83:**  $^{13}\text{C}$  NMR (500 MHz) spectrum of compound **39b**

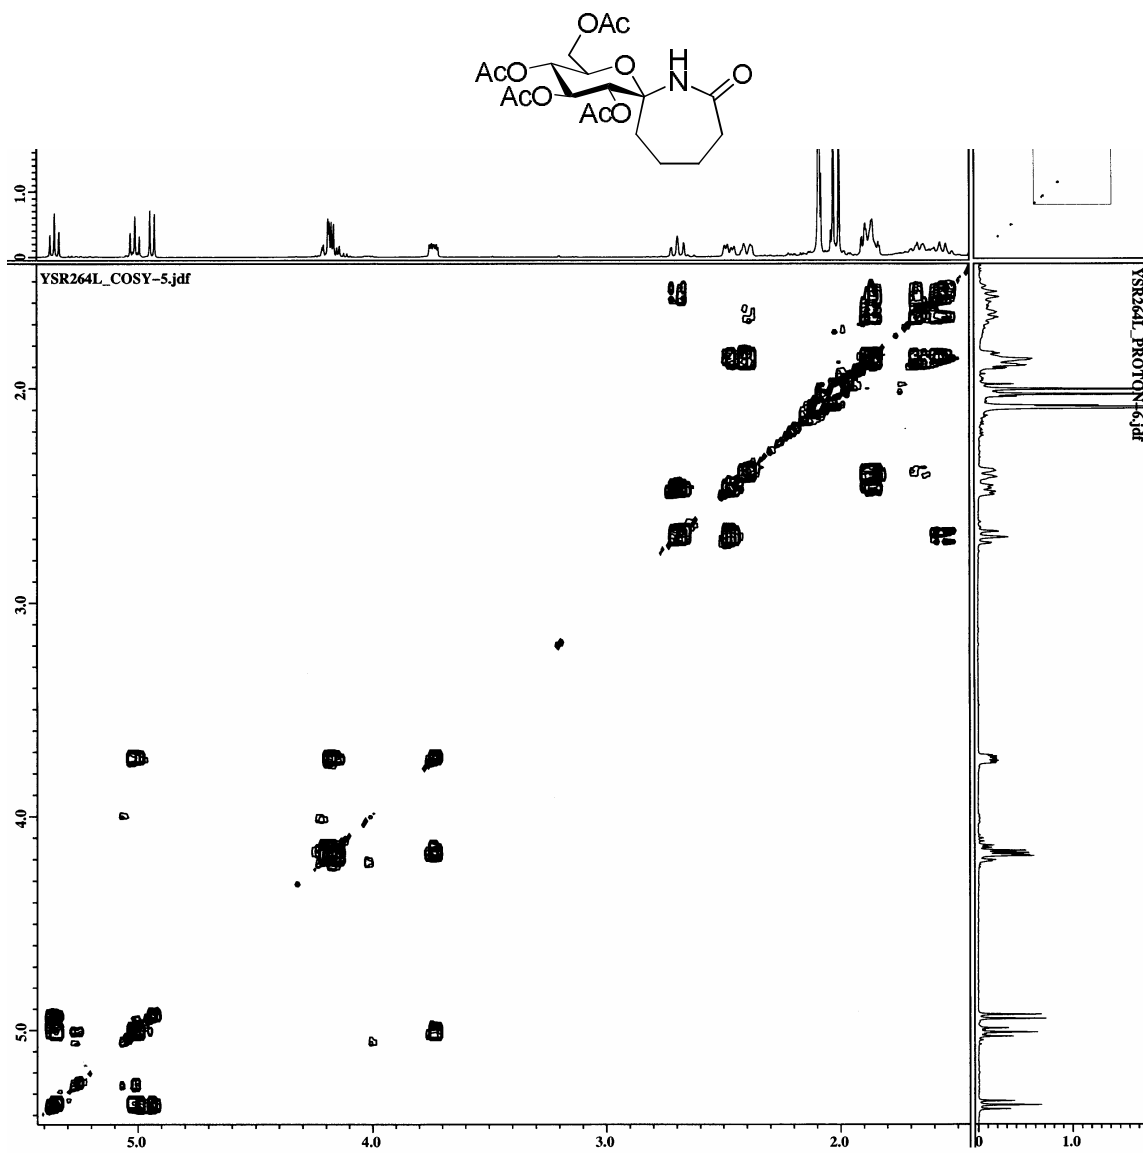

**Figure 84:**  $^1\text{H}$ - $^1\text{H}$  COSY (500 MHz) spectrum of compound **39b**

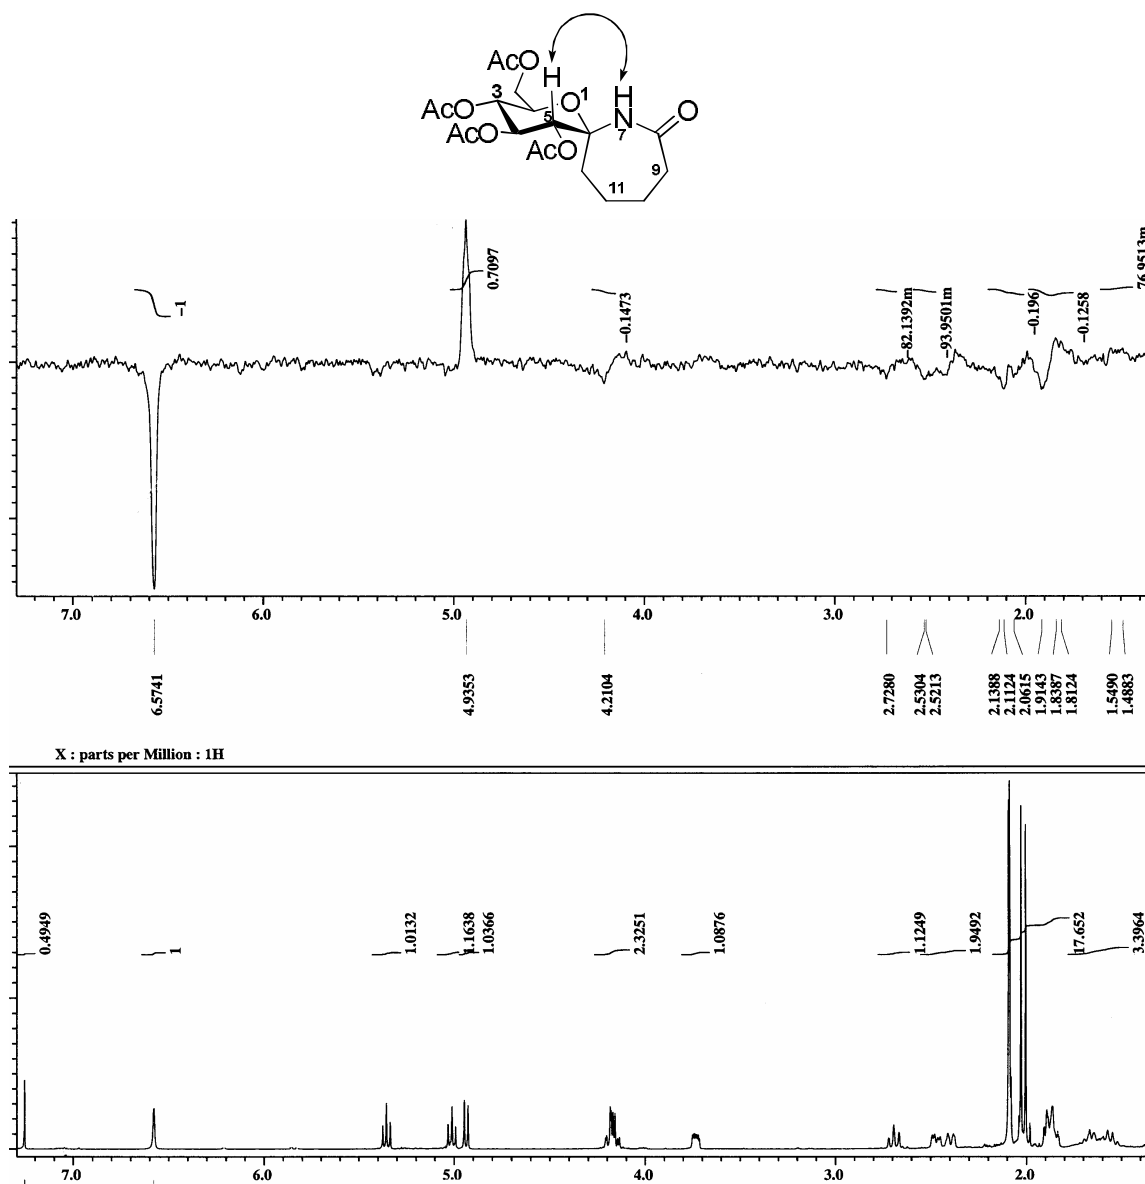

**Figure 85:** nOe (irradiation of -NH) spectrum of compound **39b**

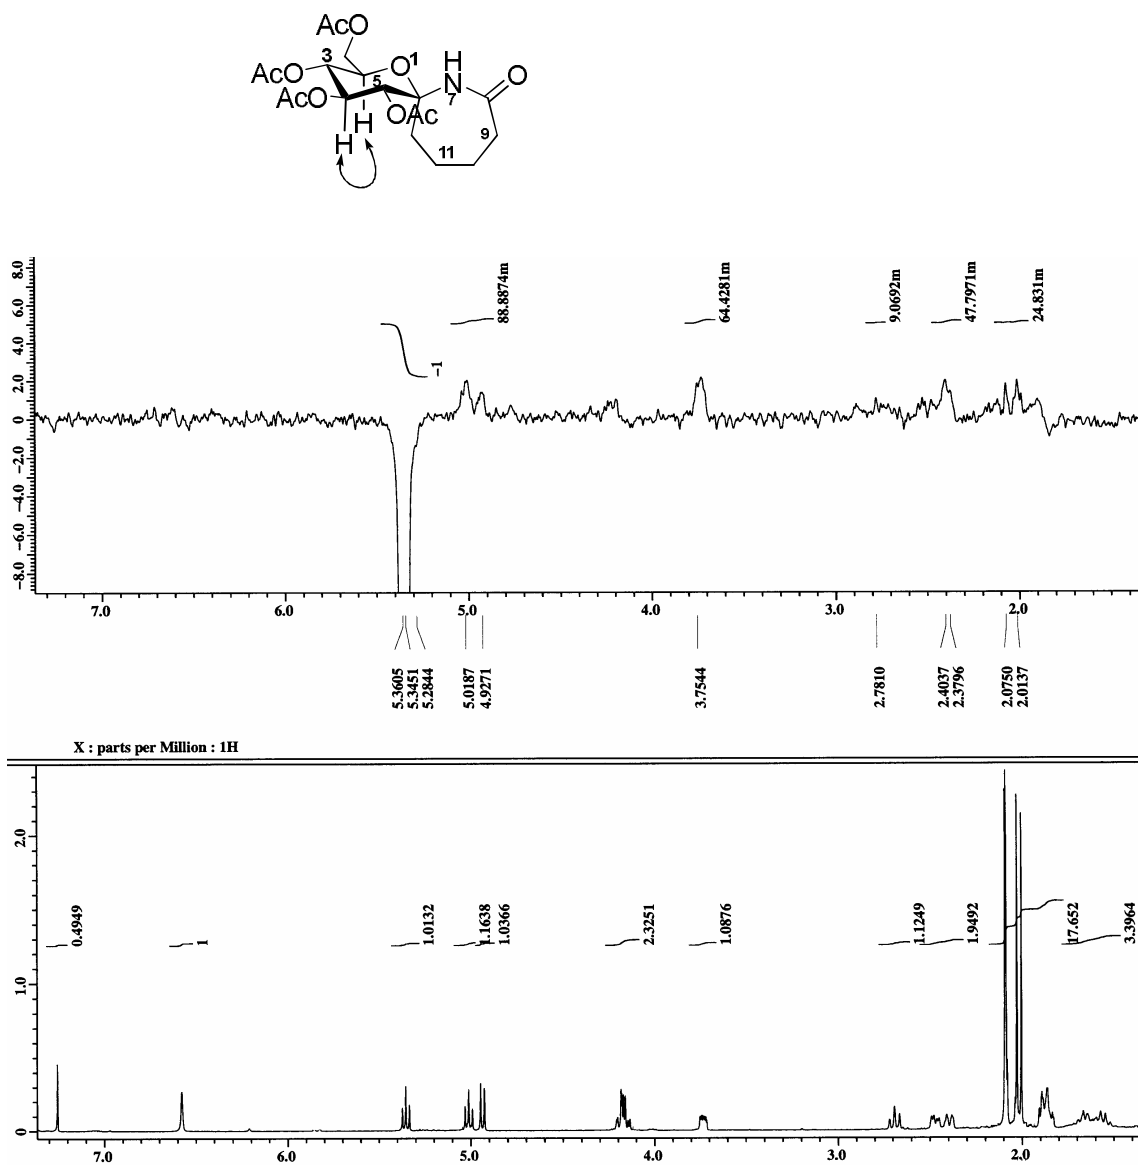

**Figure 85:** nOe (irradiation of H-4) spectrum of compound **39b**

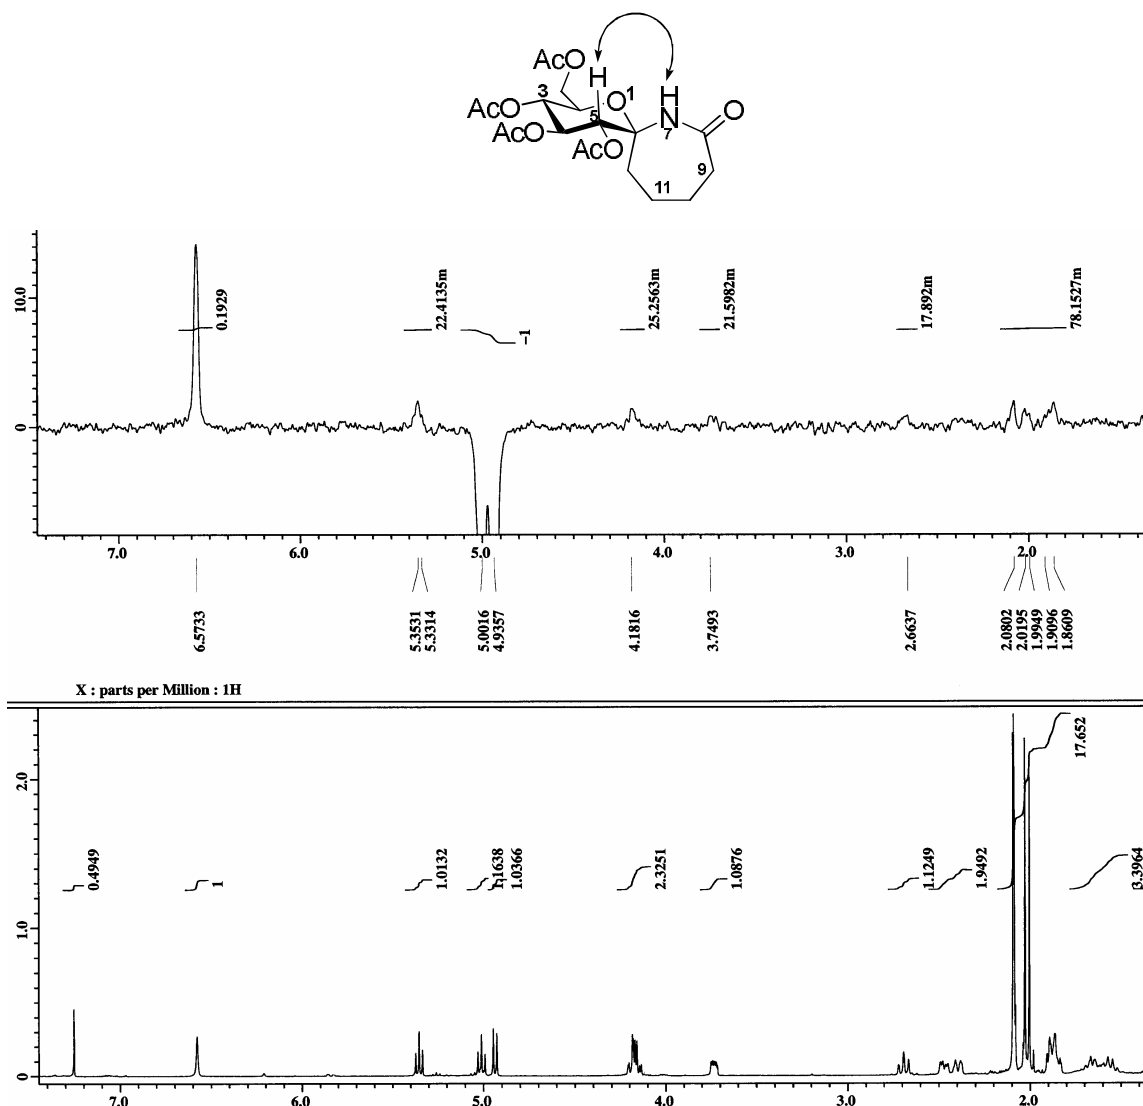

**Figure 85:** nOe (irradiation of H-5) spectrum of compound **39b**

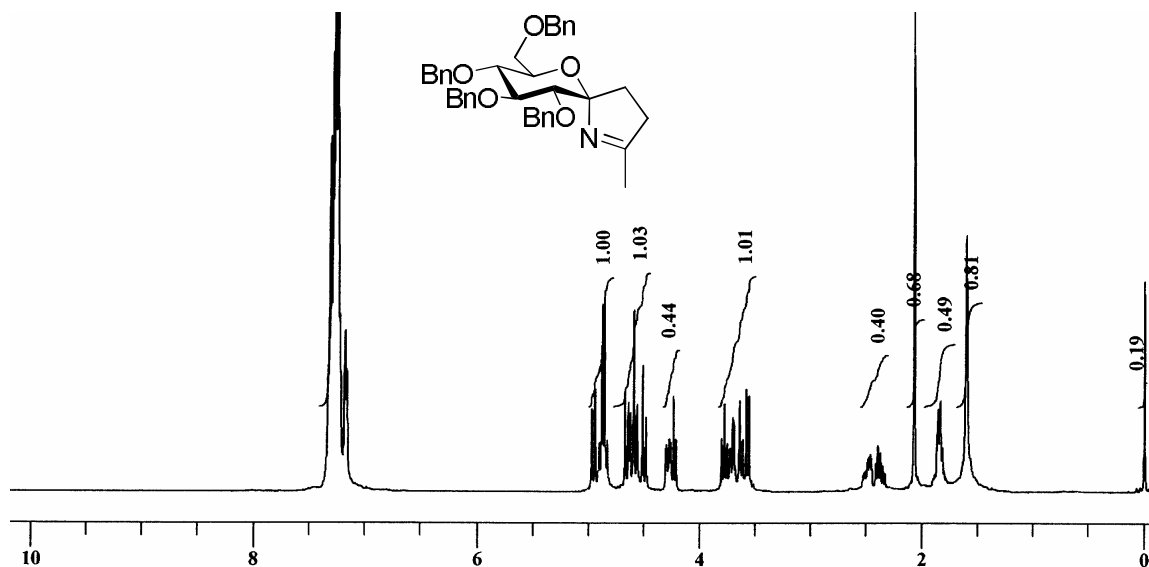

**Figure 86:**  $^1\text{H}$  NMR (400 MHz) spectrum of compound 40

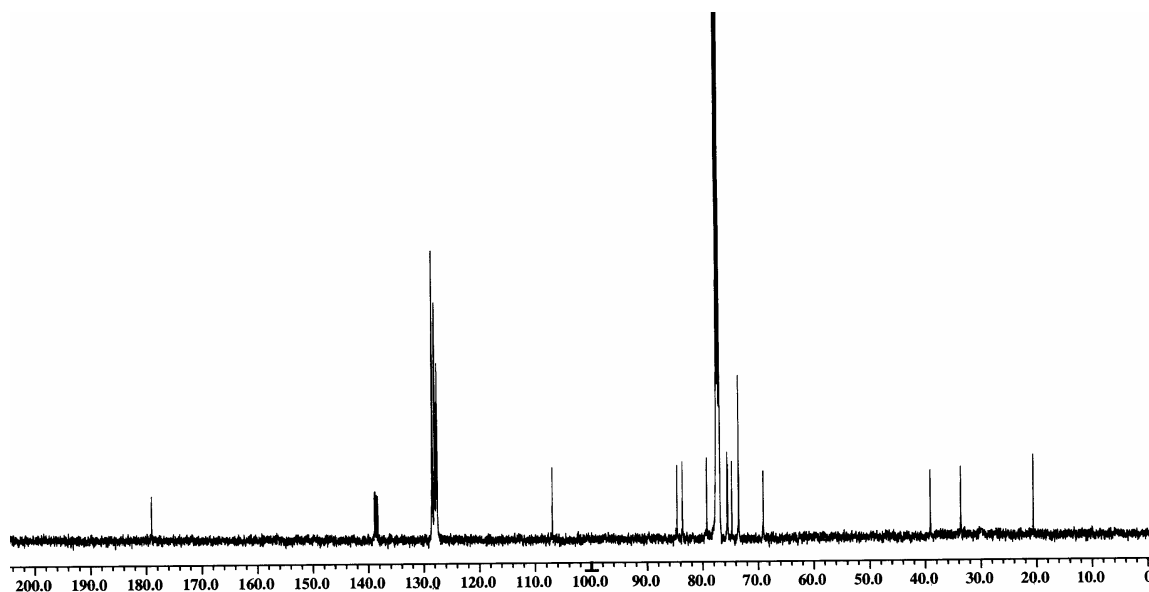

**Figure 87:**  $^{13}\text{C}$  NMR (500 MHz) spectrum of compound 40
